# Supplementary material for: Does moderate alcohol consumption accelerate the progression of liver disease in NAFLD? A systematic review and narrative synthesis
Source: PubMed Central journal article supplement (PMC8728442; doi:10.1136/bmjopen-2021-049767), 2022-01-04
Supplement: bmjopen-2021-049767.draft_revisions.pdf [file bmjopen-2021-049767.draft_revisions.pdf]

# BMJ Open

BMJ Open is committed to open peer review. As part of this commitment we make the peer review history of every article we publish publicly available.

When an article is published we post the peer reviewers' comments and the authors' responses online. We also post the versions of the paper that were used during peer review. These are the versions that the peer review comments apply to.

The versions of the paper that follow are the versions that were submitted during the peer review process. They are not the versions of record or the final published versions. They should not be cited or distributed as the published version of this manuscript.

BMJ Open is an open access journal and the full, final, typeset and author-corrected version of record of the manuscript is available on our site with no access controls, subscription charges or pay-per-view fees (<http://bmjopen.bmj.com>).

If you have any questions on BMJ Open's open peer review process please email [info.bmjopen@bmj.com](mailto:info.bmjopen@bmj.com)

# BMJ Open

## Does moderate alcohol consumption accelerate the progression of liver disease in NAFLD? A systematic review and narrative synthesis

|                               |                                                                                                                                                                                                                                                                                                                                                                                                                                                                                          |
|-------------------------------|------------------------------------------------------------------------------------------------------------------------------------------------------------------------------------------------------------------------------------------------------------------------------------------------------------------------------------------------------------------------------------------------------------------------------------------------------------------------------------------|
| Journal:                      | <i>BMJ Open</i>                                                                                                                                                                                                                                                                                                                                                                                                                                                                          |
| Manuscript ID                 | bmjopen-2021-049767                                                                                                                                                                                                                                                                                                                                                                                                                                                                      |
| Article Type:                 | Original research                                                                                                                                                                                                                                                                                                                                                                                                                                                                        |
| Date Submitted by the Author: | 08-Feb-2021                                                                                                                                                                                                                                                                                                                                                                                                                                                                              |
| Complete List of Authors:     | Jarvis, Helen; Newcastle University, Population Health Sciences Institute<br>O'Keefe, Hannah; Newcastle University, Population Health Sciences Institute<br>Craig, Dawn; Newcastle University, Population Health Sciences Institute<br>Stow, Daniel; Newcastle University, Population Health Sciences Institute<br>Hanratty, Barbara; Newcastle University, Population Health Sciences Institute<br>Anstee, Quentin; Newcastle University, Translational and Clinical Research Institute |
| Keywords:                     | Hepatology < INTERNAL MEDICINE, GENERAL MEDICINE (see Internal Medicine), PRIMARY CARE                                                                                                                                                                                                                                                                                                                                                                                                   |
|                               |                                                                                                                                                                                                                                                                                                                                                                                                                                                                                          |

SCHOLARONE™  
Manuscripts

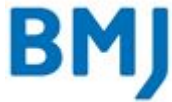

I, the Submitting Author has the right to grant and does grant on behalf of all authors of the Work (as defined in the below author licence), an exclusive licence and/or a non-exclusive licence for contributions from authors who are: i) UK Crown employees; ii) where BMJ has agreed a CC-BY licence shall apply, and/or iii) in accordance with the terms applicable for US Federal Government officers or employees acting as part of their official duties; on a worldwide, perpetual, irrevocable, royalty-free basis to BMJ Publishing Group Ltd ("BMJ") its licensees and where the relevant Journal is co-owned by BMJ to the co-owners of the Journal, to publish the Work in this journal and any other BMJ products and to exploit all rights, as set out in our [licence](#).

The Submitting Author accepts and understands that any supply made under these terms is made by BMJ to the Submitting Author unless you are acting as an employee on behalf of your employer or a postgraduate student of an affiliated institution which is paying any applicable article publishing charge ("APC") for Open Access articles. Where the Submitting Author wishes to make the Work available on an Open Access basis (and intends to pay the relevant APC), the terms of reuse of such Open Access shall be governed by a Creative Commons licence – details of these licences and which [Creative Commons](#) licence will apply to this Work are set out in our licence referred to above.

Other than as permitted in any relevant BMJ Author's Self Archiving Policies, I confirm this Work has not been accepted for publication elsewhere, is not being considered for publication elsewhere and does not duplicate material already published. I confirm all authors consent to publication of this Work and authorise the granting of this licence.

1  
2  
3 **Does moderate alcohol consumption accelerate the progression of liver disease**  
4 **in NAFLD? A systematic review and narrative synthesis**  
5  
6  
7  
8

9 Helen Jarvis<sup>1</sup> (0000-0001-5039-0228) , Hannah O'Keefe<sup>1</sup> (0000-0002-0107-711X), Dawn Craig<sup>1</sup>,  
10 Daniel Stow<sup>1</sup>, \*Barbara Hanratty<sup>1</sup>, \*Quentin M Anstee<sup>2</sup>  
11  
12  
13

- 14 1. Population Health Sciences Institute, Faculty of Medical Sciences, Newcastle  
15 University, Newcastle upon Tyne, UK, NE2 4HH  
16  
17

18  
19 Helen Jarvis [helen.jarvis2@ncl.ac.uk](mailto:helen.jarvis2@ncl.ac.uk)

20 NIHR Doctoral Research Fellow

21 Hannah O'Keefe [hannah.o'keefe@newcastle.ac.uk](mailto:hannah.o'keefe@newcastle.ac.uk)

22 Training Fellow in Evidence Synthesis

23 Dawn Craig ([dawn.craig@newcastle.ac.uk](mailto:dawn.craig@newcastle.ac.uk))

24 Professor of Practice in Evidence Synthesis

25 Daniel Stow ([daniel.stow@newcastle.ac.uk](mailto:daniel.stow@newcastle.ac.uk))

26 Research Associate

27 Barbara Hanratty ([barbara.hanratty@newcastle.ac.uk](mailto:barbara.hanratty@newcastle.ac.uk))

28 Professor of Primary Care and Public Health  
29  
30  
31  
32  
33  
34  
35  
36  
37

- 38 2. Translational and Clinical Research institute, Faculty of Medical Sciences, Newcastle  
39 University, Newcastle upon Tyne, UK, NE2 4HH  
40  
41

42 Quentin M Anstee ([quentin.anstee@newcastle.ac.uk](mailto:quentin.anstee@newcastle.ac.uk))

43 Professor of Experimental Hepatology  
44  
45  
46

47 \* Joint last authorship BH and QMA  
48  
49  
50  
51

- 52 1. Correspondence to: Helen Jarvis, GP and NIHR DRF, Population Health Sciences  
53 Institute, Faculty of Medical Sciences, Newcastle University, Newcastle upon Tyne, UK,  
54 NE2 4HH. Email: [helen.jarvis2@ncl.ac.uk](mailto:helen.jarvis2@ncl.ac.uk)  
55  
56  
57  
58  
59  
60

**Structured abstract:****Objectives:**

Liver disease is a leading cause of premature death, partly driven by the increasing incidence of Non-alcohol related fatty liver disease (NAFLD). Many people with a diagnosis of NAFLD drink moderate amounts of alcohol. There is limited guidance for clinicians looking to advise these patients on the effect this will have on their liver disease progression. This review synthesises the evidence on moderate alcohol consumption and its potential to predict liver disease progression in people with diagnosed NAFLD.

**Methods:**

A systematic review of longitudinal observational cohort studies was conducted. Databases (MEDLINE, EMBASE, The Cochrane Library and ClinicalTrials.gov) were searched up to September 2020. Studies were included that reported progression of liver disease in adults with NAFLD, looking at moderate levels of alcohol consumption as the exposure of interest. Risk of bias was assessed using the QUIPS tool.

**Results:**

Of 4241 unique citations, 6 met the inclusion criteria. Pooling of data was not possible due to heterogeneity and studies were analysed using narrative synthesis. Evidence suggested that any level of alcohol consumption is associated with worsening of liver outcomes in NAFLD, even for drinking within recommended limits. Well conducted population based studies estimated up to a doubling of incident liver disease outcomes in NAFLD patients drinking at moderate levels.

**Conclusions:**

This review found that any level of alcohol intake in NAFLD may be harmful to liver health. Study heterogeneity in definitions of alcohol exposure as well as in outcomes limited quantitative pooling of results. Use of standardised definitions for exposure and outcomes would support future meta-analysis.

Based on this synthesis of the most up to date longitudinal evidence, clinicians seeing patients with NAFLD should currently advise abstinence from alcohol.

**Funding and registration:**

This study was funded by an NIHR DRF (NIHR300716). The protocol was registered with PROSPERO (#CRD42020168022).

### **Strengths and limitations of this study:**

- Up to date synthesis of the best available evidence on the role of moderate alcohol consumption in NAFLD.
- Clear protocol limiting inclusion to longitudinal evidence to study temporal associations.
- Study heterogeneity in definitions of alcohol exposure and outcomes limited quantitative pooling of results.
- Only six studies met the inclusion criteria; further studies using standardized definitions are needed in this area to support meta-analysis

### **Main Text:**

#### **Introduction:**

Liver disease is an increasing health burden across the world, and it is now a major cause of premature (<65) mortality (1,2). As premature mortality rates from many non-communicable diseases have fallen over the last 30 years, the burden of liver disease is increasing (2,3). The commonest causes of chronic liver disease in high income countries are alcohol related liver disease (ARLD) and metabolic-syndrome related liver disease (or non-alcohol related fatty liver disease - NAFLD). Whilst the labelling of liver disease suggests a dichotomy, the clinical reality is that there is significant overlap between ARLD and NAFLD (4). The incidence of obesity and diabetes is rising, and a substantial proportion of the population is drinking alcohol at above recommended limits (5). It is estimated that up to 17% of the adult population may meet criteria for both NAFLD and ARLD (6). Despite this, there is little guidance available for generalist healthcare professionals, on how to advise people with a diagnosis of NAFLD on safer alcohol consumption.

Recommendations on safe alcohol consumption levels vary worldwide. Increasingly, they take into account the effect that alcohol has on the risk of developing many adverse health outcomes, including cancer. International analysis suggests this should be as low as total

1  
2  
3 abstinence to minimize all health risks (7). Recommended limits for safe alcohol consumption in  
4 the UK general population are up to 14 units of alcohol per week in both males and females (8),  
5 which equates to 16 grams of alcohol per day at 8g/unit. Moderate alcohol consumption is  
6 generally defined in the literature as drinking within, or slightly in excess of, these limits versus  
7 complete abstinence (4). There is a significant gap between this recommended 'moderate' limit  
8 and the levels of alcohol consumption that would prompt an assessment for alcohol-related liver  
9 damage. The UK National Institute of Health and Care Excellence (NICE) recommends offering  
10 a liver cirrhosis test to men drinking over 50 units and women drinking over 35 units a week on  
11 an ongoing basis over several months (9), leaving a significant proportion who are drinking at  
12 and above 14 units a week, but below the levels to have liver assessment based on their  
13 alcohol consumption alone.  
14  
15  
16  
17  
18  
19  
20  
21

22 There is still uncertainty, and an absence of guidance, on safe levels of alcohol consumption for  
23 people with established NAFLD. Indeed, it is not clear that any level of alcohol consumption is  
24 safe to minimise progression of the liver disease in this population. It is known that people with  
25 very high levels of alcohol consumption (who would meet criteria for a diagnosis of ARLD), and  
26 who also have metabolic risk factors, are at even greater risk of adverse liver outcomes (10,11).  
27 But there is also some evidence that for people with metabolic risk factors (but who do not have  
28 a NAFLD diagnosis), drinking alcohol at low levels may protect against cardiovascular disease,  
29 prevent fatty liver disease, and lead to better outcomes than with complete abstinence (12,13).  
30  
31  
32  
33  
34  
35

36 The purpose of this systematic review is to synthesise evidence on the role of moderate alcohol  
37 consumption on progression to severe liver disease in people with diagnosed NAFLD. This will  
38 help guide the advice given to NAFLD populations around safe alcohol consumption in primary  
39 care and specialist settings.  
40  
41  
42  
43

#### 44 **Methods:**

45  
46  
47 The protocol for this review was registered in advance with PROSPERO (International  
48 Prospective Register of Systematic Reviews, #CRD42020168022).  
49  
50  
51

#### 52 *Types of studies, inclusion and exclusion criteria*

53  
54  
55  
56  
57  
58  
59  
60

1  
2  
3 Primary studies were included if they were prospective or retrospective cohort studies. The  
4 population of interest was adult patients (>18 years old) with diagnosed NAFLD. The outcome  
5 of interest was progression of liver disease in this population. The exposure of interest was no  
6 vs moderate alcohol consumption. For our inclusion criteria we defined 'moderate consumption'  
7 as up to 35 units per week in females, and 50 units per week in males (levels that would be  
8 considered the threshold for definite risk of ARLD according to NICE guidelines (9)). This  
9 definition included studies that focused on the effects of alcohol within or just above current  
10 weekly recommended limits (the usual definition of 'moderate' alcohol consumption), as well as  
11 those who looked beyond these levels of consumption, up to the NICE ARLD levels.  
12  
13

14  
15  
16  
17  
18  
19 Exclusion criteria were as follows: 1) studies where the population had diagnosed ARLD; 2)  
20 studies where the population was defined according to their alcohol consumption levels rather  
21 than their NAFLD status at baseline; 3) studies where patients already had severe liver disease  
22 at the time of cohort entry; 4) cross sectional studies or studies where exposure was only  
23 measured at the same time as outcome.  
24  
25  
26  
27

28 We performed a systematic review following the Preferred Reporting Items for Systematic  
29 Reviews and Meta-Analyses (PRISMA) guidelines (14).  
30  
31  
32

### 33 *Search strategy and data extraction*

34  
35

36 Potentially relevant studies were identified through systematic literature searches of relevant  
37 databases (MEDLINE, EMBASE, The Cochrane Library and ClinicalTrials.gov, CPCI-S  
38 (Conference Proceedings Citation Index – Science, Web of Knowledge), OpenGrey  
39 (<http://www.opengrey.eu/>)) in January 2020 and updated in September 2020. No language  
40 restrictions were applied, and databases were searched from 1990 onwards. Reference lists  
41 from potentially relevant papers and previous review articles were hand searched. MeSH  
42 (Medical Subject Headings) and free text terms for the NAFLD population, alcohol exposures  
43 and liver outcomes of interest were used. Two researchers (HJ and either HO or DS)  
44 independently screened titles and abstracts. Any disagreement in full text selection was  
45 resolved by consensus. Record screening was also assisted by Rayyan, an online software tool  
46 that assesses similarities between selected records and highlights other potentially relevant  
47 studies based on the screener's previous selection (15). Full texts of potentially relevant papers  
48 were obtained and read by two independent researchers with reference to the predefined set of  
49  
50  
51  
52  
53  
54  
55  
56  
57  
58  
59  
60



1  
2  
3 criteria to identify final study inclusion. Data were extracted into a standardised form, piloted on  
4 3 studies before full extraction. Data extraction was based on the updated checklist for critical  
5 appraisal and data extraction for systematic reviews of prediction studies (CHARMS-PF)  
6 checklist for prognostic studies (16), undertaken by one researcher and checked by a second.  
7 Two authors (HJ, HO) assessed the risk of bias independently. Since the included studies were  
8 observational cohort studies of prognostic factors, the QUIPS (Quality in Prognostic factor  
9 Studies) tool was used (17).  
10  
11  
12  
13  
14  
15

### 16 *Data synthesis*

17  
18  
19 Pooling of data was not possible due to heterogeneity across studies. A narrative synthesis (18)  
20 was undertaken, with data synthesised by alcohol exposure level. Due to the small number of  
21 studies, even those with high risk of bias are included in the synthesis, although this bias  
22 assessment is made clear throughout the narrative.  
23  
24  
25

### 26 *Patient and Public Involvement*

27  
28  
29  
30 Patients and the Public were not involved in the the design or conduct of this review but will be  
31 involved in the dissemination of findings through a funded PPI steering group and close  
32 collaboration with the British Liver Trust.  
33  
34  
35

### 36 **Results:**

37  
38  
39  
40 The searches identified 4241 unique citations. Of the titles and abstracts screened, 34 articles  
41 were selected for full-text screening. Twenty-eight were excluded for reasons reported in the  
42 PRISMA diagram (Figure 1). A total of six unique studies representing data from five cohorts  
43 were eligible for inclusion in the systematic review, and were assessed for quality (Figure 1),  
44 (19-24).  
45  
46  
47  
48  
49  
50

### 51 *Characteristics of included studies*

52  
53  
54  
55 *Further details of included studies are shown in Table 1.*  
56  
57  
58  
59  
60

Table 1: Characteristics of included studies

1  
2  
3  
4  
5  
6  
7  
8  
9  
10  
11  
12  
13  
14  
15  
16  
17  
18  
19  
20  
21  
22  
23  
24  
25  
26  
27  
28  
29  
30  
31  
32  
33  
34  
35  
36  
37  
38  
39  
40  
41  
42  
43  
44  
45  
46  
47

| Author /year     | Country                                    | Study design and population                                                                                 | Yrs f/u | Method of NAFLD diag* | Method of measuring alcohol consumption                           | Definition of moderate consumption studied as RF                     | Study outcomes of interest and event no                         | Adjustments of interest considered                          | Adjusted HRs/OR for liver events with 95% CI and p-values                                                                                                              | Risk of bias |
|------------------|--------------------------------------------|-------------------------------------------------------------------------------------------------------------|---------|-----------------------|-------------------------------------------------------------------|----------------------------------------------------------------------|-----------------------------------------------------------------|-------------------------------------------------------------|------------------------------------------------------------------------------------------------------------------------------------------------------------------------|--------------|
| Aberg 2019 (19)  | Finland                                    | retrospective data linkage cohort analysis NAFLD population 6462, mean age 53 yrs, 60% M                    | 10.9    | FLI >30               | Questionnaire at cohort entry                                     | < 50g/day in 10 g categories with abstinence as reference            | composite non-fatal and fatal liver disease 58 events           | ? unclear other than age, sex                               | per increase in 10g of alcohol per day from abstinence HR 1.43 (1.12 - 1.82) p0.004                                                                                    | high         |
| Aberg 2020 (20)  | Finland (FINRISK Health survey)            | retrospective data linkage cohort analysis NAFLD population 8345, mean age 53.7 yrs, 60% M                  | 11.1    | FLI >60               | Questionnaire at cohort entry (recall for past month)             | < 50g/day in 10 g categories with abstinence as reference            | composite non-fatal and fatal liver disease 152 events          | age, sex, smoking, T2DM                                     | g alcohol/day v abstinence<br>0-9 HR 1.38 (0.74-2.58)<br>10-19 HR 2.18(1.04-4.53)<br>20-29 HR 3.62(1.67-7.76)<br>30-39 HR 3.53(1.53-8.14)<br>40-49 HR8.79(3.95-19.56)  | low          |
| Ajmera 2018 (21) | USA                                        | retrospective analysis of longitudinal cohorts within NASH CRN NAFLD population 285, mean age 47 yrs, 30% M | 3.9     | liver biopsy          | Questionnaire at cohort entry (Skinner lifetime drinking history) | <2 drinks per day and excluded if >6 drinks on 1 occasion >= monthly | histological progress on follow up biopsy                       | age, sex, race, smoking                                     | OR of outcome persistent moderate drinkers v abstinence**<br>resolution of NASH OR 0.32 (0.11-0.92) p0.04<br>fibrosis progression OR 0.00 (-0.29-0.29) p0.99           | mod          |
| Chang 2019 (22)  | South Korea (Kangbuk Samsung Health Study) | prospective population cohort NAFLD population 58927, mean age 37.7, 82% M                                  | 4.9     | US                    | Questionnaire at each study visit (annual or biennial)            | 10 - 19.9 g/day (F)<br>10 - 29.9 g/day (M)<br>(low 1-9.9g/day)       | fibrosis progress as estimated by high indirect serum scores*** | age, sex, BMI, smoking, exercise level, education, T2DM, BP | mod v abstinence\$ (repeat observations)<br>Fib4: HR 1.33(1.13-1.57)<br>NFS: HR 1.37(1.23-1.52)<br>low v abstinence (repeat observations)<br>Fib 4: HR 1.08(0.91-1.27) | low          |

1  
2  
3  
4  
5  
6  
7  
8  
9  
10  
11  
12  
13  
14  
15  
16  
17  
18  
19  
20  
21  
22  
23  
24  
25  
26  
27  
28  
29  
30  
31  
32  
33  
34  
35  
36  
37  
38  
39  
40  
41  
42  
43  
44  
45  
46  
47

|                       |        |                                                                                                                                        |      |                           |                                                           |                                                         |                                                |                                                 |                                                                                                                                             |     |
|-----------------------|--------|----------------------------------------------------------------------------------------------------------------------------------------|------|---------------------------|-----------------------------------------------------------|---------------------------------------------------------|------------------------------------------------|-------------------------------------------------|---------------------------------------------------------------------------------------------------------------------------------------------|-----|
|                       |        |                                                                                                                                        |      |                           |                                                           |                                                         |                                                |                                                 | NFS: HR 1.14(1.02-1.27)                                                                                                                     |     |
| Ekstedt 2009 (23)     | Sweden | retrospective cohort<br>NAFLD population 71,<br>mean age 47.3, 72% M                                                                   | 13.8 | US and<br>liver<br>biopsy | Questionnaire<br>AUDIT-C and<br>interview at<br>follow up | g/day - no<br>upper limit<br>defined as<br>'moderate'   | fibrosis<br>progress on<br>follow up<br>biopsy | age, sex, BMI,<br>T2DM, fibrosis<br>at baseline | increasing alcohol g/week<br>OR 1.012 (1.000-1.025)<br>p0.055                                                                               | low |
| Kawamura<br>2016 (24) | Japan  | prospective cohort<br>NAFLD population<br>9959, mean age 49,<br>87% M<br>(included 18 patients<br>>70g alcohol/day<br>defined as ARLD) | 5.4  | US                        | Questionnaire<br>at baseline and<br>every 6<br>months     | g/day in<br>categories with<br><20g/day as<br>reference | HCC on<br>imaging                              | age, sex, BMI,<br>T2DM, serum<br>markers        | g/day alcohol v <20g/day<br>20-39 HR 0.90(0.11-7.90)<br>p0.919<br>≥40-69 HR 2.48(1.01-6.05)<br>p0.047<br>>70 HR 12.61(5.68-28.00)<br>p0.001 | low |

Abbreviations: NAFLD = non-alcohol related fatty liver disease; NASH = non-alcohol related steatohepatitis; ARLD = alcohol related liver disease; RF= risk factor; CRN= clinical research network; Yrs = years; M = Male; FLI = Fatty Liver Index; US = hepatic ultrasound; g = grams; HCC = hepatocellular carcinoma; BMI = body mass index; T2DM = type 2 diabetes mellitus; BP = blood pressure; HR = Hazard ratio; OR = Odds ratio; CI = confidence interval; NFS = NAFLD fibrosis score.

\*\*Note multiple differences in means and OR presented for different histological and biochemical outcomes between abstainers, persistent moderate drinkers, and changes in alcohol consumption between biopsies. Presented data represent histological outcomes of potential clinical prognostic significance within the remit of this review.

\*\*\* Scores used to estimate fibrosis progression were the Fib4 score, NAFLD fibrosis score (NFS) and APRI score \$ multiple HR presented in paper for different score outcomes for single and repeated outcome measures looking at intermediate/high- or high-risk scores in low and moderate drinkers and different subgroups. Presented data represent outcomes best in keeping with remit of this review using widely used indirect serum markers of liver fibrosis.

Within the studies meeting inclusion criteria, three (21,22,23) looked at the exposure of alcohol consumption up to, or similar to, the accepted international definition of 'moderate consumption'. This is <20g/day in women and <30g/day in men (25). Three of the studies (19,20,24) looked at low alcohol consumption but also extended 'moderate consumption' up to levels of alcohol consumption which would be considered more consistent with ARLD. Table 2 shows international definitions of moderate alcohol consumption, UK recommended limits and levels that would warrant assessment for ARLD, all expressed in grams of alcohol and UK units.

Table 2: alcohol consumption definitions and equivalences

| Definitions:                                                     | grams of alcohol |          | UK Units of alcohol |                   |
|------------------------------------------------------------------|------------------|----------|---------------------|-------------------|
|                                                                  | Daily*           | Weekly*  | Daily*              | Weekly*           |
| Accepted International consensus of moderate alcohol consumption | <b>F: &lt;20</b> | F: <140  | F: < 2.5            | F: <17.5          |
|                                                                  | <b>M: &lt;30</b> | M: <210  | M: < 3.75           | M: < 26.25        |
| UK recommended safe weekly limits                                | </= 16           | </= 112  | </= 2               | <b>&lt;/= 14</b>  |
| NICE thresholds for assessing for liver cirrhosis                | F: > 40          | F :> 280 | F: > 5              | <b>F: &gt; 35</b> |
|                                                                  | M:> 57           | M: >400  | M: > 7.1            | <b>M: &gt; 50</b> |

\* Daily and weekly figures are given for comparison only. The bold numbering for each definition is the standard format in which this definition is expressed

### ***Moderate alcohol consumption (accepted international definitions) and risk of liver disease progression in NAFLD***

Three studies examined the effects of alcohol in NAFLD using definitions in keeping with the accepted international definition of 'moderate consumption' (21,22,23). Although these studies shared a similar aim, they varied in NAFLD population definition, measurement of alcohol consumption and choice of liver outcomes. Two looked at histological progression outcomes and one used non-invasive indirect blood-based markers of liver fibrosis. Two of the studies

1  
2  
3 were rated as having a low risk of bias (22,23) and one was rated as having a moderate risk  
4 (21).  
5  
6  
7

8 Ajmera et al (21) studied a NAFLD population taken retrospectively from the NASH clinical  
9 research network, including populations from an observational study and the placebo arm of two  
10 NASH drug trials, all of whom had biopsy proven NAFLD (285 participants). Alcohol  
11 consumption was measured at cohort entry and at varying time points up to, and including,  
12 follow-up liver biopsy, which occurred, on average, four years later. Multiple histological markers  
13 of disease progression were studied, and the authors looked at the association between  
14 baseline drinking status and disease progression as well as change in drinking status over time  
15 and disease progression. For most of the histological end points studied, there was no  
16 significant difference between moderate drinkers and abstainers in outcomes, with the only  
17 significant results suggesting that abstainers had less progressive or a higher likelihood of  
18 regression of their disease between biopsies, particularly the persistent abstainers. Results  
19 should be interpreted in the knowledge that a large number of related histological outcomes  
20 were reported, increasing the likelihood of a statistically significant result by chance. The  
21 absence of detailed information on which other prognostic factors were taken into account, led  
22 to a rating of moderate on risk of bias assessment.  
23  
24  
25  
26  
27  
28  
29  
30  
31  
32

33 A similar study by Ekstedt et al (23) looked at a smaller group (71 participants) of biopsy proven  
34 NAFLD, with follow up histology an average of 13.8 years after initial biopsy. Alcohol  
35 consumption was assessed at baseline and follow up, with heavy episodic drinking assessed in  
36 addition to weekly consumption. Primary outcome was significant fibrosis progression, defined  
37 as progression by one or more fibrosis stage or the development of end stage liver disease  
38 during follow up. Although higher weekly alcohol consumption showed some tendency to predict  
39 fibrosis progression (OR for increase in grams of alcohol per week 1.012 (1.000 - 1.025)) only  
40 the presence of heavy episodic drinking (defined as >60g/day in men and >48g/day in women  
41 more than once a month) reached statistical significance in predicting fibrosis progression.  
42  
43  
44  
45  
46  
47  
48

49 Of note in both the Ajmera and Ekstedt studies were the very low levels of alcohol consumption  
50 in the 'moderate drinkers', with the majority (78%) of the moderate drinkers drinking less than  
51 monthly in the Ajmera study and the average weekly alcohol consumption in the Ekstedt study  
52 being only 39 g/week. Both studies also included a significant number of patients who already  
53 had liver inflammation (NASH) at baseline (over 50% in both studies), indicating a higher  
54  
55  
56  
57  
58  
59  
60

1  
2  
3 proportion of patients with a tendency to progressive disease as compared to a general NAFLD  
4 population, as would be expected with biopsy-based studies.  
5  
6  
7

8 In contrast to the relatively selective biopsy studies, Chang et al (22) studied a large prospective  
9 population cohort (Kangbuk Samsung Health Study) of whom 58,927 had ultrasound evidence  
10 of fatty liver but without evidence of other liver diagnoses or advanced disease. Alcohol  
11 exposure was weekly units at baseline and follow up was for a median of 8.3 years with  
12 outcome of interest being progression to advanced liver fibrosis using non-invasive blood-based  
13 markers of disease. For moderate drinkers (10 - 30 g/day), the risk of progressing to advanced  
14 fibrosis (using intermediate/high Fib4 score as the outcome) was HR 1.33 (1.13 - 1.57), when  
15 compared to abstainers. Light drinkers (1-10 g/day) showed a tendency towards more advanced  
16 disease when compared to abstainers, but this did not reach statistical significance (HR 1.08 CI  
17 0.91-1.27).  
18  
19  
20  
21  
22  
23

24  
25 ***Moderate alcohol consumption (below the threshold that would be consistent with ARLD)***  
26 ***and risk of liver disease progression in NAFLD***  
27  
28  
29

30 Three studies extended the definition of moderate alcohol consumption beyond the international  
31 consensus definition of 'moderate consumption'. Two of the studies were rated as having a low  
32 risk of bias (20,24), with one rated as high risk of bias (19).  
33  
34  
35

36 The general population longitudinal data presented by Chang et al is supplemented by two  
37 recent related studies by Aberg et al (19,20), using data from the same Finnish National Health  
38 Surveys (FINRISK, Health 2000) cohort. The definition of moderate alcohol consumption was  
39 increased to include anything up to 50 grams per day in these studies. Although the exposures  
40 and outcome measures were the same in the two related studies, the NAFLD population was  
41 defined using different fatty liver index (FLI) cut offs values, generating overlapping but distinct  
42 study populations. For this reason, data are presented from both studies.  
43  
44  
45

46 The first study, only available as a conference abstract, (19) used a FLI>30 to retrospectively  
47 define their NAFLD population. This low FLI would generally be used as a 'rule out' rather than  
48 'rule in' cutoff for NAFLD diagnosis (26) and the limited data presented suggests that using  
49 abstinence as a reference, any increase in alcohol consumption by 10 g/day, increased incident  
50 liver events (combined fatal and non-fatal outcomes) by 43% with a presented HR of 1.43 (1.12  
51 - 1.82) for each 10 g rise in daily alcohol consumption. The data presented contained few details  
52  
53  
54  
55  
56  
57  
58  
59

1  
2  
3 of adjustment factors or analysis plan. This study was graded as having a high risk of bias, and  
4 these results should be interpreted with caution.  
5  
6

7  
8 A larger study (20), based on the same cohort, retrospectively identified a NAFLD population  
9 based on a FLI of >60 (the accepted and validated cut off for making a positive diagnosis of  
10 NAFLD in the literature (26)). Alcohol intake at cohort entry was based on estimated  
11 consumption over the previous year. Lifetime abstainers were used as the reference group.  
12 Fatal and non-fatal liver outcomes were studied in 8345 participants over 92 350 person years  
13 of follow up. The study concluded that incident liver disease is higher at all levels of alcohol  
14 consumption, compared to lifetime abstainers with steadily rising hazard ratios as the level of  
15 alcohol consumption increases. Although drinking up to 10g per day was not statistically  
16 significantly different to abstaining (HR 1.38 CI 0.74 -2.58 in the final model), levels of alcohol  
17 consumption between 10 g and 19 g, which are roughly equivalent to the 14 units per week  
18 recommended limits, prognosticated for over double the number of incident liver events in  
19 NAFLD patients (HR 2.18 CI 1.05-4.53). At higher levels, which would not necessarily trigger a  
20 liver assessment for alcohol related harm in current guidelines, risk of significant liver disease  
21 was nearly nine times higher (for consumption of 40 - 49 g of alcohol a day, HR 8.79 CI 3.95-  
22 19.56).  
23  
24  
25  
26  
27  
28  
29  
30  
31  
32

33 A retrospective Japanese cohort study also looked at stepwise rises in daily alcohol  
34 consumption as a prognostic factor for the more specific outcome of hepatocellular carcinoma  
35 (HCC) in people with fatty liver (identified on ultrasound). The Kawamura study (24) with 9959  
36 participants followed for a median of nearly 2000 days, had a reference group of people drinking  
37 < 20g of alcohol per day, rather than abstainers. This differed from all the other studies  
38 reviewed. Only those drinking at between 40-69 g of alcohol a day had a statistically significant  
39 increase in rates of HCC (HR 2.48 CI 1.01 - 6.05 p 0.047), with no effect in those drinking at  
40 more moderate levels. The population in this retrospective cohort were patients undergoing  
41 ultrasound at two tertiary hepatology centres in Japan rather than a general population cohort,  
42 and as HCC is known to occur in non-cirrhotic NAFLD (27) comparison with outcomes from  
43 other studies should be interpreted with caution.  
44  
45  
46  
47  
48  
49  
50  
51

52 Excluding the only study rated as having a high risk of bias (19), the other good quality  
53 longitudinal studies of varying design, all reported either no association or a negative impact of  
54 moderate amounts of alcohol on future liver disease outcomes. This was seen across the  
55  
56  
57  
58  
59  
60

1  
2  
3 studies looking at levels of alcohol consumption within the international definition of moderate  
4 consumption, and those that extended this definition of moderate consumption.  
5  
6  
7

## 8 **Discussion:**

### 9 10 *Summary of results*

11  
12  
13  
14 In this systematic review of the latest available longitudinal data, we found evidence to suggest  
15 that any amount of alcohol, even at low levels, may be harmful for liver health in people with  
16 diagnosed NAFLD. This evidence comes from both general population-based cohorts using  
17 coded liver outcomes, as well as tertiary centre NAFLD populations defined using histological  
18 end points.  
19  
20  
21

### 22 23 *Comparison with existing literature*

24  
25  
26  
27 Until recently the majority of evidence in this area has come from cross-sectional studies where  
28 alcohol exposure was assessed at the same time as liver outcomes. These data provides  
29 somewhat contradictory results, with several studies indicating that moderate alcohol  
30 consumption is associated with lower levels of liver disease progression (28,29,30,31) although  
31 more recent studies support of our findings, and suggest the opposite (32,33). The design  
32 employed in these studies does not allow the assessment of temporal relationships and is open  
33 to reverse causality (those with liver damage may be newly abstaining from alcohol for example)  
34 in addition to recall and other biases. On the basis of these limitations, cross-sectional studies  
35 were excluded from this current review, although they have been widely cited in previous critical  
36 reviews in this area, before more recent longitudinal data were available.  
37  
38  
39  
40  
41  
42  
43

44 In the historical absence of large prospective cohort studies and the impossibility of conducting  
45 a controlled trial in the area, comparative work has been undertaken using Mendelian  
46 randomisation. This utilises random genetic variations which affects the rate of alcohol  
47 metabolism as a proxy measure for alcohol exposure, with randomisation of NAFLD patients  
48 based on an allele known to confer lower lifetime alcohol consumption by necessity due to the  
49 unpleasant effects of drinking even low levels of alcohol. Findings from this study were  
50 supportive of our review, with the group with higher lifetime alcohol consumption showing  
51  
52  
53  
54  
55  
56  
57  
58  
59  
60



1  
2  
3 markers of more severe disease on biopsy, even though alcohol consumption was at very  
4 modest levels (34).  
5  
6  
7

8 In addition to the evidence on the relationship between modest alcohol consumption in NAFLD  
9 and liver outcomes, other published studies have focused on overall mortality and  
10 cardiovascular outcomes. A study of 4264 participants in an ultrasound diagnosed NAFLD  
11 cohort study showed no significant difference in overall mortality in those with alcohol  
12 consumption in the low/moderate range versus abstinence after 20 years of follow up (35). A  
13 subsequent study with the same US cohort reported a protective effect of low alcohol  
14 consumption on overall survival in NAFLD (36). The evidence for a protective effect of low  
15 alcohol consumption on cardiovascular outcomes in the general population is generally  
16 accepted (37). The evidence for cardiovascular protection in those with NAFLD is more limited,  
17 with some evidence that moderate alcohol may provide some benefit (38) but more recent  
18 studies finding no protective effects (32,39). The comparative evidence on overall mortality and  
19 cardiovascular outcomes highlights the need to assess liver disease risks within these  
20 competing contexts.  
21  
22  
23  
24  
25  
26  
27  
28  
29

### 30 *Strengths and limitations*

31  
32

33 Although there have been several recent critical reviews of the role of moderate alcohol  
34 consumption in NAFLD, the most recent of which reach similar conclusions (4,40,41), these  
35 have been wider in their remit with less well defined inclusion criteria and less systematic  
36 methodology. The predetermined inclusion criteria, robust systematic data collection and  
37 reporting techniques (in line with PRISMA guidelines) and decision to avoid cross-sectional data  
38 are all important in providing the best available evidence to answer the review question of the  
39 temporal relationship between moderate alcohol consumption and liver outcomes in NAFLD.  
40 The challenges of synthesising observational data, including unmeasured confounding and  
41 heterogeneity, were anticipated, but meant that data pooling was not possible.  
42  
43  
44  
45  
46  
47  
48

49 A particular limitation hindering comparison between studies were the methods of defining  
50 moderate alcohol consumption. The consensus for defining a level of alcohol consumption  
51 above which a diagnosis of pure NAFLD cannot be made have been supported by the  
52 European Association for the Study of the Liver (EASL) and the American Association for the  
53 Study of the Liver Diseases (AASLD) and set at 20g/day in women and 30g/day in men (25,42),  
54  
55  
56  
57  
58  
59  
60

1  
2  
3 yet most of the published studies do not use these cut-offs in their data. Until this is  
4 standardised across studies, with an additional consensus defining levels above this 'moderate'  
5 but not high enough to reach levels associated with a definite diagnosis of ARLD, synthesising  
6 the evidence in this area will remain challenging.  
7  
8  
9

### 10 *Implications for research/practice*

11  
12  
13  
14 This review adds weight to individual studies showing that any level of alcohol intake in NAFLD  
15 may be harmful to liver health. Further prospective cohort studies are needed, with detailed  
16 definitions/measures of alcohol exposure, and validated clinical liver outcomes, measured at  
17 appropriate times. Future research should focus on looking at outcomes in relation to accepted  
18 alcohol intake levels used in definitions of NAFLD. It should also take into account that the  
19 clinical reality is a dual-aetiology patient who may currently be excluded from both diagnostic  
20 categories based on their alcohol intake being too high for NAFLD, and too low for ARLD  
21 definitions. This is an ever-expanding patient group seen in many clinical settings.  
22  
23  
24  
25  
26  
27

28 Based on the evidence synthesised in this review, clinicians seeing patients with NAFLD in  
29 primary or secondary care should currently advise abstinence from alcohol to avoid accelerating  
30 liver harm. This is likely to be difficult for patients to accept, and public health messaging will  
31 need careful thought if it is to have any impact on liver health.  
32  
33  
34  
35  
36  
37

### 38 Author contribution statement:

39  
40 HJ: conceptualization, methodology, conduct, analysis, writing of initial draft

41 HO: methodology, conduct, figures/infographic, critical review and comments on drafts

42 DC: supervision of methodology, conduct, critical review and comments on drafts

43 DS: methodology, conduct, critical review and comments on drafts

44 BH: conceptualization, supervision of methodology, conduct, analysis, critical review and  
45 comments on drafts

46 QA: conceptualization, supervision of conduct and analysis, critical review and comments on  
47 drafts  
48  
49

### 50 Competing interest statement:

51  
52  
53 All authors have completed the Unified Competing Interest form and declare that the study was  
54 funded by an NIHR Doctoral Research Fellowship (HJ personal award). There were no financial  
55  
56  
57  
58  
59  
60

relationships with any organisations that might have an interest in the submitted work in the previous three years. All authors report no other relationships or activities that could appear to have influenced the submitted work.

HJ reports grants from National Institute for Health research (NIHR), during the conduct of the study; personal fees from Intercept Pharma, personal fees from Norgine , outside the submitted work;

QMA reports grants from European Commission, during the conduct of the study; other from Acuitas Medical, grants, personal fees and other from Allergan/Tobira, other from E3Bio, other from Eli Lilly & Company Ltd, other from Galmed, grants, personal fees and other from Genfit SA, personal fees and other from Gilead, other from Grunthal, other from Imperial Innovations, grants and other from Intercept Pharma Europe Ltd, other from Inventiva, other from Janssen, personal fees from Kenes, other from MedImmune, other from NewGene, grants and other from Pfizer Ltd, other from Raptor Pharma, grants from GlaxoSmithKline, grants and other from Novartis Pharma AG, grants from Abbvie, personal fees from BMS, grants from GSK, other from NGMBio, other from Madrigal, other from Servier, outside the submitted work;

#### Funding statement:

This work was supported by and NIHR Doctoral Research Fellowship – HJ personal award. Award no: NIHR300716.

#### Data Sharing statement:

All data relevant to the study are included in the article or uploaded as supplementary information

#### References:

1. Williams R, Aspinall R, Bellis M, et al. Addressing liver disease in the UK: a blueprint for attaining excellence in health care and reducing premature mortality from lifestyle issues of excess consumption of alcohol, obesity, and viral hepatitis. *Lancet*. 2014;384(9958):1953–97.
2. GBD 2017 Cirrhosis Collaborators. The global, regional, and national burden of cirrhosis by cause in 195 countries and territories, 1990-2017: a systematic analysis for the Global Burden of Disease Study 2017. *Lancet Gastroenterol Hepatol*. 2020 Mar;5(3):245-266.

- 1
- 2
- 3 3. Martinez R, Lloyd-Sherlock P, Soliz P, et al. Trends in premature avertable mortality
- 4 from non-communicable diseases for 195 countries and territories, 1990-2017: a
- 5 population-based study. *Lancet Glob Health* 2020;8:e511-e523.
- 6
- 7
- 8 4. Boyle M, Masson S, Anstee QM. The bidirectional impacts of alcohol consumption and
- 9 the metabolic syndrome: Cofactors for progressive fatty liver disease. *J Hepatol.*
- 10 2018;68(2):251–67.
- 11
- 12
- 13 5. Williams R, Alexander G, Armstrong I, et al. Disease burden and costs from excess
- 14 alcohol consumption, obesity, and viral hepatitis: fourth report of the Lancet Standing
- 15 Commission on Liver Disease in the UK. *Lancet.* 2017 Nov 28;
- 16
- 17 6. Baumeister SE, Alte D, Meyer C, John U. Health Risk drinking and problematic
- 18 consumption of alcohol in Pomerania: comparative analysis of the Study of Health in
- 19 Pomerania (SHIP) compared with the Federal German Health and Examination Survey
- 20 in 1998. *Gesundheitswesen.* 2005 Jan;67(1):39–47.
- 21
- 22
- 23 7. Collaborators GBDA. Alcohol use and burden for 195 countries and territories, 1990-
- 24 2016: a systematic analysis for the Global Burden of Disease Study 2016. *Lancet*
- 25 2018;392:1015-1035.
- 26
- 27
- 28 8. UK Chief Medical Officers' Low Risk Drinking Guidelines. Available at:
- 29 [https://assets.publishing.service.gov.uk/government/uploads/system/uploads/attachment](https://assets.publishing.service.gov.uk/government/uploads/system/uploads/attachment_data/file/545937/UK_CMOs_report.pdf)
- 30 [\\_data/file/545937/UK\\_CMOs\\_report.pdf](https://assets.publishing.service.gov.uk/government/uploads/system/uploads/attachment_data/file/545937/UK_CMOs_report.pdf)
- 31
- 32
- 33 9. Cirrhosis in over 16s: assessment and management | Guidance and guidelines | NICE.
- 34 Available from: <https://www.nice.org.uk/guidance/ng50>
- 35
- 36 10. Hart CL, Morrison DS, Batty GD, Mitchell RJ, Davey Smith G. Effect of body mass index
- 37 and alcohol consumption on liver disease: analysis of data from two prospective cohort
- 38 studies. *BMJ.* 2010 Mar 11;340:c1240.
- 39
- 40
- 41 11. Liu B, Balkwill A, Reeves G, Beral V, Million Women Study Collaborators. Body mass
- 42 index and risk of liver cirrhosis in middle aged UK women: prospective study. *BMJ.* 2010
- 43 Mar 11;340:c912.
- 44
- 45
- 46 12. Thun MJ, Peto R, Lopez AD, et al. Alcohol consumption and mortality among middle-
- 47 aged and elderly U.S. adults. *N Engl J Med.* 1997 Dec 11;337(24):1705–14.
- 48
- 49 13. Sookoian S, Castaño GO, Pirola CJ. Modest alcohol consumption decreases the risk of
- 50 non-alcoholic fatty liver disease: a meta-analysis of 43 175 individuals. *Gut.* 2014
- 51 Mar;63(3):530–2.
- 52
- 53
- 54
- 55
- 56
- 57
- 58
- 59
- 60

14. Moher D, Liberati A, Tetzlaff J, Altman DG, The PRISMA Group (2009). *Preferred Reporting Items for Systematic Reviews and Meta-Analyses: The PRISMA Statement*. [PLoS Med 6\(7\): e1000097. doi:10.1371/journal.pmed1000097](https://doi.org/10.1371/journal.pmed1000097)
15. Ouzzani M, Hammady H, Fedorowicz Z, Elmagarmid A. Rayyan-a web and mobile app for systematic reviews. *Syst Rev*. 2016 05;5(1):210.
16. Moons KGM, Groot JAH de, Bouwmeester W, et al. Critical Appraisal and Data Extraction for Systematic Reviews of Prediction Modelling Studies: The CHARMS Checklist. *PLOS Medicine*. 2014 Oct 14;11(10):e1001744.
17. Hayden JA, van der Windt DA, Cartwright JL, Côté P, Bombardier C. Assessing bias in studies of prognostic factors. *Ann Intern Med*. 2013 Feb 19;158(4):280–6.
18. Popay J, Roberts H, Sowden A, et al. Guidance on the conduct of narrative synthesis in systematic reviews: a product from the ESRC Methods Programme. Lancaster: Lancaster University. 2006;10(2.1):1018–4643
19. Åberg F, Puukka P, Sahlman P et al. In NAFLD, alcohol drinking habits and genetics predict progression to advanced liver disease: follow-up of population surveys. *Journal of Hepatology*. 2019; 70: e141. (poster abstract)
20. Åberg F, Puukka P, Salomaa V, et al. Risks of Light and Moderate Alcohol Use in Fatty Liver Disease: Follow-Up of Population Cohorts. *Hepatology*. 2020 Mar;71(3):835–48.
21. Ajmera V, Belt P, Wilson LA, et al. Among Patients With Nonalcoholic Fatty Liver Disease, Modest Alcohol Use Is Associated With Less Improvement in Histologic Steatosis and Steatohepatitis. *Clin Gastroenterol Hepatol*. 2018;16(9):1511-1520.e5.
22. Chang Y, Cho YK, Kim Y, et al. Nonheavy Drinking and Worsening of Noninvasive Fibrosis Markers in Nonalcoholic Fatty Liver Disease: A Cohort Study. *Hepatology*. 2019;69(1):64–75.
23. Ekstedt M, Franzén LE, Holmqvist M, et al. Alcohol consumption is associated with progression of hepatic fibrosis in non-alcoholic fatty liver disease. *Scand J Gastroenterol*. 2009;44(3):366–74.
24. Kawamura Y, Arase Y, Ikeda K, et al. Effects of Alcohol Consumption on Hepatocarcinogenesis in Japanese Patients With Fatty Liver Disease. *Clin Gastroenterol Hepatol*. 2016 Apr;14(4):597–605.
25. European Association for the Study of the Liver (EASL), European Association for the Study of Diabetes (EASD), European Association for the Study of Obesity (EASO). EASL-EASD-EASO Clinical Practice Guidelines for the Management of Non-Alcoholic Fatty Liver Disease. *Obes Facts*. 2016;9(2):65–90.

- 1
  - 2
  - 3
  - 4
  - 5
  - 6
  - 7
  - 8
  - 9
  - 10
  - 11
  - 12
  - 13
  - 14
  - 15
  - 16
  - 17
  - 18
  - 19
  - 20
  - 21
  - 22
  - 23
  - 24
  - 25
  - 26
  - 27
  - 28
  - 29
  - 30
  - 31
  - 32
  - 33
  - 34
  - 35
  - 36
  - 37
  - 38
  - 39
  - 40
  - 41
  - 42
  - 43
  - 44
  - 45
  - 46
  - 47
  - 48
  - 49
  - 50
  - 51
  - 52
  - 53
  - 54
  - 55
  - 56
  - 57
  - 58
  - 59
  - 60
26. Bedogni G, Bellentani S, Miglioli L, et al. The Fatty Liver Index: a simple and accurate predictor of hepatic steatosis in the general population. *BMC Gastroenterol*. 2006 Nov 2;6:33.
27. Negro F. Natural history of NASH and HCC. *Liver Int*. 2020;40 Suppl 1:72–6.
28. Dunn W, Sanyal AJ, Brunt EM, et al. Modest alcohol consumption is associated with decreased prevalence of steatohepatitis in patients with non-alcoholic fatty liver disease (NAFLD). *J Hepatol*. 2012 Aug;57(2):384–91.
29. Hagström H, Nasr P, Ekstedt M, et al. Low to moderate lifetime alcohol consumption is associated with less advanced stages of fibrosis in non-alcoholic fatty liver disease. *Scand J Gastroenterol*. 2017 Feb;52(2):159–65.
30. Kwon HK, Greenson JK, Conjeevaram HS. Effect of lifetime alcohol consumption on the histological severity of non-alcoholic fatty liver disease. *Liver Int*. 2014 Jan;34(1):129–35.
31. Mitchell T, Jeffrey GP, MacQuillan GC, et al. The impact of alcohol consumption on hepatic fibrosis in non-alcoholic fatty liver disease. *Hepatology*. 2016. Vol 64 (supp) 548A (poster abstract)
32. Kashiwagi K, Yamaguchi A, Shiba S, et al. Moderate alcohol consumption is not associated with subclinical cardiovascular damage but with hepatic fibrosis in non-alcoholic fatty liver disease. *Alcohol*. 2020 Jul 30;89:1–7.
33. Mulazzani L, Alvisi M, Tovoli F, et al. Moderate alcohol consumption is associated with risk of fibrosis in patients with non-alcoholic fatty liver disease. *Digestive and Liver Disease*. 2020; 52 (0): pp e43-e44.
34. Sookoian S, Flichman D, Castaño GO, Pirola CJ. Mendelian randomisation suggests no beneficial effect of moderate alcohol consumption on the severity of nonalcoholic fatty liver disease. *Aliment Pharmacol Ther*. 2016;44(11–12):1224–34.
35. Younossi ZM, Stepanova M, Ong J, et al. Effects of Alcohol Consumption and Metabolic Syndrome on Mortality in Patients With Nonalcoholic and Alcohol-Related Fatty Liver Disease. *Clin Gastroenterol Hepatol*. 2018 Nov 23;
36. Hajifathalian K, Torabi Sagvand B, McCullough AJ. Effect of Alcohol Consumption on Survival in Nonalcoholic Fatty Liver Disease: A National Prospective Cohort Study. *Hepatology*. 2019;70(2):511–21.
37. Klatsky AL. Alcohol and cardiovascular diseases. *Expert Review of Cardiovascular Therapy [Internet]*. 2009 May 1 [cited 2020 Sep 14];7(5):499–506.

- 1  
2  
3 38. Sinn DH, Gwak G-Y, Cho J, et al. Modest alcohol consumption and carotid plaques or  
4 carotid artery stenosis in men with non-alcoholic fatty liver disease. *Atherosclerosis*.  
5 2014 Jun 1;234(2):270–5.  
6  
7  
8 39. VanWagner LB, Ning H, Allen NB, et al. Alcohol Use and Cardiovascular Disease Risk in  
9 Patients With Nonalcoholic Fatty Liver Disease. *Gastroenterology*. 2017;153(5):1260-  
10 1272.e3.  
11  
12 40. Ajmera VH, Terrault NA, Harrison SA. Is moderate alcohol use in nonalcoholic fatty liver  
13 disease good or bad? A critical review. *Hepatology*. 2017 Jun;65(6):2090–9.  
14  
15 41. Åberg F, Färkkilä M, Männistö V. Interaction Between Alcohol Use and Metabolic Risk  
16 Factors for Liver Disease: A Critical Review of Epidemiological Studies. *Alcohol Clin Exp*  
17 *Res*. 2020;44(2):384–403.  
18  
19 42. Chalasani N, Younossi Z, Lavine JE, et al. The diagnosis and management of non-  
20 alcoholic fatty liver disease: practice guideline by the American Gastroenterological  
21 Association, American Association for the Study of Liver Diseases, and American  
22 College of Gastroenterology. *Gastroenterology*. 2012 Jun;142(7):1592–609.  
23  
24  
25  
26  
27  
28  
29

30 Figure 1: PRISMA diagram of study selection  
31  
32  
33  
34  
35  
36  
37  
38  
39  
40  
41  
42  
43  
44  
45  
46  
47  
48  
49  
50  
51  
52  
53  
54  
55  
56  
57  
58  
59  
60

Fig 1: PRISMA diagram of study selection

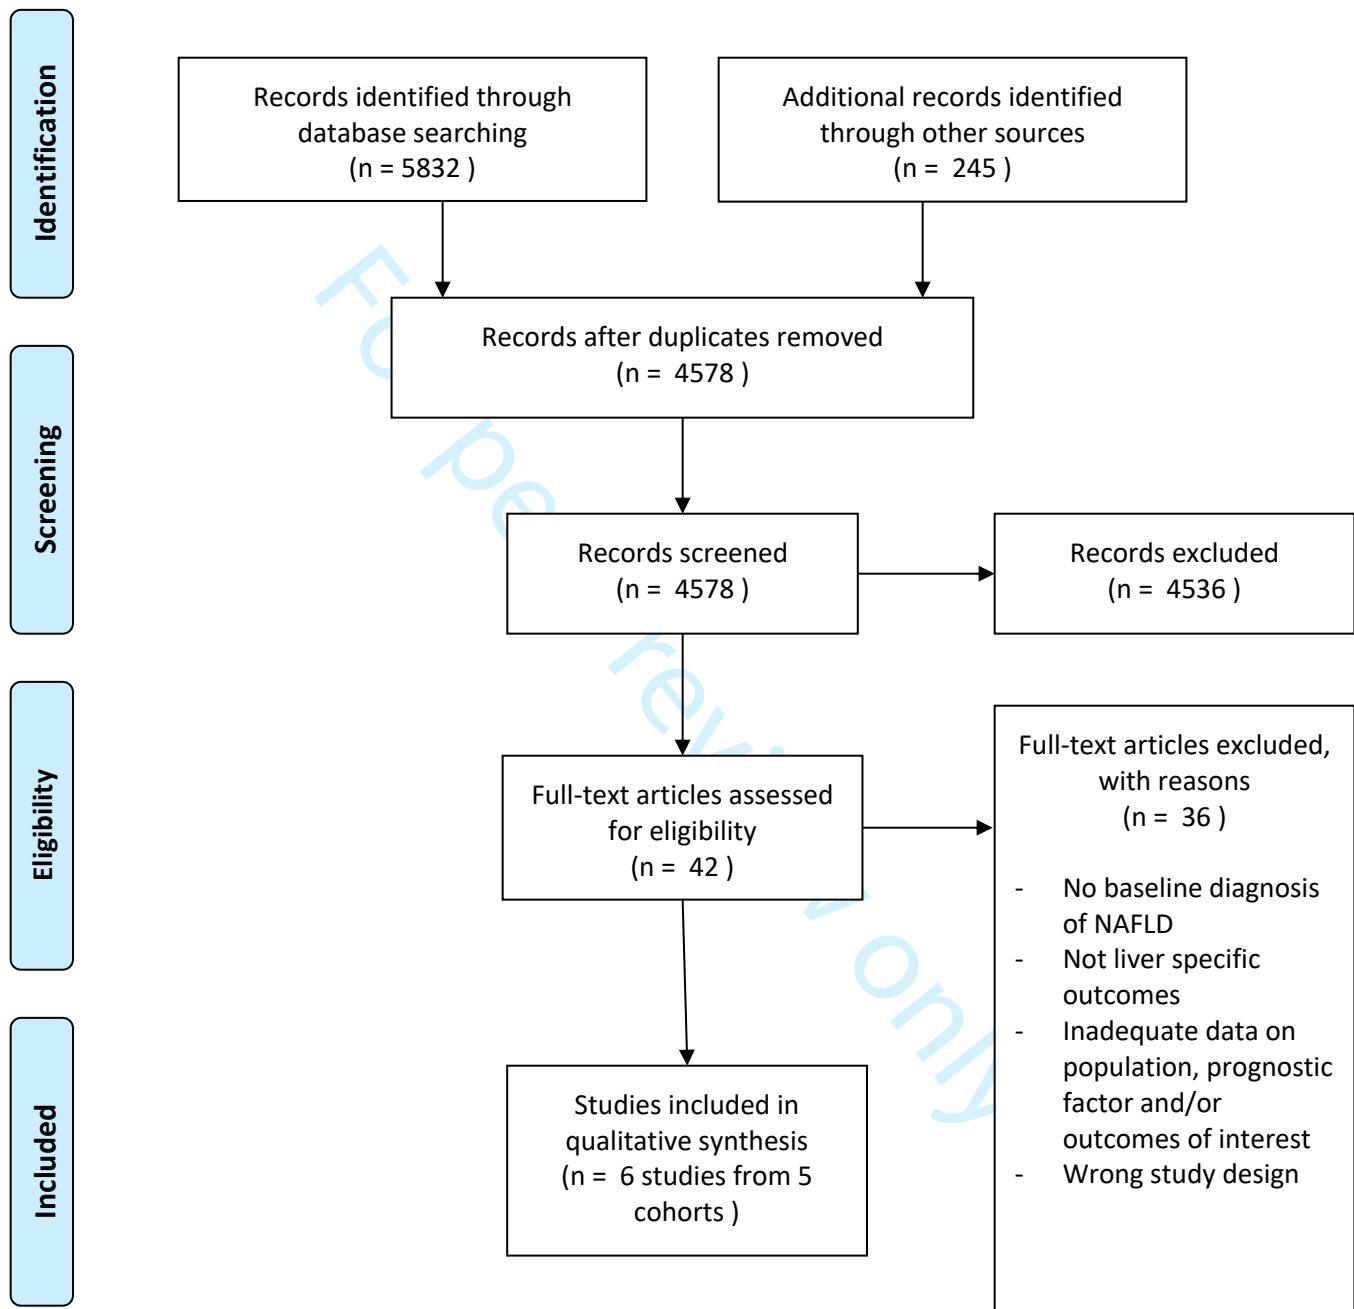



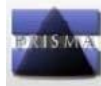

## PRISMA 2009 Checklist

| Section/topic             | #  | Checklist item                                                                                                                                                                                                                                                                                              | Reported on page #               |
|---------------------------|----|-------------------------------------------------------------------------------------------------------------------------------------------------------------------------------------------------------------------------------------------------------------------------------------------------------------|----------------------------------|
| <b>TITLE</b>              |    |                                                                                                                                                                                                                                                                                                             |                                  |
| Title                     | 1  | Identify the report as a systematic review, meta-analysis, or both.                                                                                                                                                                                                                                         | Within title                     |
| <b>ABSTRACT</b>           |    |                                                                                                                                                                                                                                                                                                             |                                  |
| Structured summary        | 2  | Provide a structured summary including, as applicable: background; objectives; data sources; study eligibility criteria, participants, and interventions; study appraisal and synthesis methods; results; limitations; conclusions and implications of key findings; systematic review registration number. | Abstract section para 1-4        |
| <b>INTRODUCTION</b>       |    |                                                                                                                                                                                                                                                                                                             |                                  |
| Rationale                 | 3  | Describe the rationale for the review in the context of what is already known.                                                                                                                                                                                                                              | Introduction Para 1-3            |
| Objectives                | 4  | Provide an explicit statement of questions being addressed with reference to participants, interventions, comparisons, outcomes, and study design (PICOS).                                                                                                                                                  | Introduction Para 4              |
| <b>METHODS</b>            |    |                                                                                                                                                                                                                                                                                                             |                                  |
| Protocol and registration | 5  | Indicate if a review protocol exists, if and where it can be accessed (e.g., Web address), and, if available, provide registration information including registration number.                                                                                                                               | Methods Para 1                   |
| Eligibility criteria      | 6  | Specify study characteristics (e.g., PICOS, length of follow-up) and report characteristics (e.g., years considered, language, publication status) used as criteria for eligibility, giving rationale.                                                                                                      | Methods – para 2-3               |
| Information sources       | 7  | Describe all information sources (e.g., databases with dates of coverage, contact with study authors to identify additional studies) in the search and date last searched.                                                                                                                                  | Methods Para 3-4                 |
| Search                    | 8  | Present full electronic search strategy for at least one database, including any limits used, such that it could be repeated.                                                                                                                                                                               | On request                       |
| Study selection           | 9  | State the process for selecting studies (i.e., screening, eligibility, included in systematic review, and, if applicable, included in the meta-analysis).                                                                                                                                                   | Methods Para 2<br>Results: Fig 1 |
| Data collection process   | 10 | Describe method of data extraction from reports (e.g., piloted forms, independently, in duplicate) and any processes for obtaining and confirming data from investigators.                                                                                                                                  | Methods Para 3,4                 |
| Data items                | 11 | List and define all variables for which data were sought (e.g., PICOS, funding sources) and any assumptions and simplifications made.                                                                                                                                                                       | Methods Para 2-3                 |


**BMJ Open 2009 Checklist**

|                                    |    |                                                                                                                                                                                                                        |                  |
|------------------------------------|----|------------------------------------------------------------------------------------------------------------------------------------------------------------------------------------------------------------------------|------------------|
| Risk of bias in individual studies | 12 | Describe methods used for assessing risk of bias of individual studies (including specification of whether this was done at the study or outcome level), and how this information is to be used in any data synthesis. | Methods para 4-5 |
| Summary measures                   | 13 | State the principal summary measures (e.g., risk ratio, difference in means).                                                                                                                                          | N/A              |
| Synthesis of results               | 14 | Describe the methods of handling data and combining results of studies, if done, including measures of consistency (e.g., $I^2$ ) for each meta-analysis.                                                              | N/A              |

Page 1 of 2

| Section/topic                 | #  | Checklist item                                                                                                                                                                                           | Reported on page #           |
|-------------------------------|----|----------------------------------------------------------------------------------------------------------------------------------------------------------------------------------------------------------|------------------------------|
| Risk of bias across studies   | 15 | Specify any assessment of risk of bias that may affect the cumulative evidence (e.g., publication bias, selective reporting within studies).                                                             | N/A                          |
| Additional analyses           | 16 | Describe methods of additional analyses (e.g., sensitivity or subgroup analyses, meta-regression), if done, indicating which were pre-specified.                                                         | N/A                          |
| <b>RESULTS</b>                |    |                                                                                                                                                                                                          |                              |
| Study selection               | 17 | Give numbers of studies screened, assessed for eligibility, and included in the review, with reasons for exclusions at each stage, ideally with a flow diagram.                                          | Results Fig 1                |
| Study characteristics         | 18 | For each study, present characteristics for which data were extracted (e.g., study size, PICOS, follow-up period) and provide the citations.                                                             | Results Table 1              |
| Risk of bias within studies   | 19 | Present data on risk of bias of each study and, if available, any outcome level assessment (see item 12).                                                                                                | Results Table 1              |
| Results of individual studies | 20 | For all outcomes considered (benefits or harms), present, for each study: (a) simple summary data for each intervention group (b) effect estimates and confidence intervals, ideally with a forest plot. | a) Table 1<br>b) N/A         |
| Synthesis of results          | 21 | Present results of each meta-analysis done, including confidence intervals and measures of consistency.                                                                                                  | N/A                          |
| Risk of bias across studies   | 22 | Present results of any assessment of risk of bias across studies (see Item 15).                                                                                                                          | N/A                          |
| Additional analysis           | 23 | Give results of additional analyses, if done (e.g., sensitivity or subgroup analyses, meta-regression [see Item 16]).                                                                                    | N/A                          |
| <b>DISCUSSION</b>             |    |                                                                                                                                                                                                          |                              |
| Summary of evidence           | 24 | Summarize the main findings including the strength of evidence for each main outcome; consider their relevance to key groups (e.g., healthcare providers, users, and policy makers).                     | Discussion Para 1-3          |
| Limitations                   | 25 | Discuss limitations at study and outcome level (e.g., risk of bias), and at review-level (e.g., incomplete retrieval of identified research, reporting bias).                                            | Discussion para 5-6          |
| Conclusions                   | 26 | Provide a general interpretation of the results in the context of other evidence, and implications for future research.                                                                                  | Discussion para 2,3,4<br>7,8 |

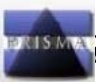

# PRISMA 2009 Checklist

1  
2  
3  
4  
5  
6  
7  
8  
9  
10  
11  
12  
13  
14  
15  
16  
17  
18  
19  
20  
21  
22  
23  
24  
25  
26  
27  
28  
29  
30  
31  
32  
33  
34  
35  
36  
37  
38  
39  
40  
41  
42  
43  
44  
45  
46  
47

| FUNDING |    |                                                                                                                                            |            |
|---------|----|--------------------------------------------------------------------------------------------------------------------------------------------|------------|
| Funding | 27 | Describe sources of funding for the systematic review and other support (e.g., supply of data); role of funders for the systematic review. | Title page |

From: Moher D, Liberati A, Tetzlaff J, Altman DG, The PRISMA Group (2009). Preferred Reporting Items for Systematic Reviews and Meta-Analyses: The PRISMA Statement. PLoS Med 6(7): e1000097. doi:10.1371/journal.pmed1000097

For more information, visit: [www.prisma-statement.org](http://www.prisma-statement.org).

Page 2 of 2

For peer review only

# BMJ Open

## Does moderate alcohol consumption accelerate the progression of liver disease in NAFLD? A systematic review and narrative synthesis

|                                 |                                                                                                                                                                                                                                                                                                                                                                                                                                                                                          |
|---------------------------------|------------------------------------------------------------------------------------------------------------------------------------------------------------------------------------------------------------------------------------------------------------------------------------------------------------------------------------------------------------------------------------------------------------------------------------------------------------------------------------------|
| Journal:                        | <i>BMJ Open</i>                                                                                                                                                                                                                                                                                                                                                                                                                                                                          |
| Manuscript ID                   | bmjopen-2021-049767.R1                                                                                                                                                                                                                                                                                                                                                                                                                                                                   |
| Article Type:                   | Original research                                                                                                                                                                                                                                                                                                                                                                                                                                                                        |
| Date Submitted by the Author:   | 27-Oct-2021                                                                                                                                                                                                                                                                                                                                                                                                                                                                              |
| Complete List of Authors:       | Jarvis, Helen; Newcastle University, Population Health Sciences Institute<br>O'Keefe, Hannah; Newcastle University, Population Health Sciences Institute<br>Craig, Dawn; Newcastle University, Population Health Sciences Institute<br>Stow, Daniel; Newcastle University, Population Health Sciences Institute<br>Hanratty, Barbara; Newcastle University, Population Health Sciences Institute<br>Anstee, Quentin; Newcastle University, Translational and Clinical Research Institute |
| <b>Primary Subject Heading</b>: | Gastroenterology and hepatology                                                                                                                                                                                                                                                                                                                                                                                                                                                          |
| Secondary Subject Heading:      | Epidemiology, General practice / Family practice                                                                                                                                                                                                                                                                                                                                                                                                                                         |
| Keywords:                       | Hepatology < INTERNAL MEDICINE, GENERAL MEDICINE (see Internal Medicine), PRIMARY CARE                                                                                                                                                                                                                                                                                                                                                                                                   |
|                                 |                                                                                                                                                                                                                                                                                                                                                                                                                                                                                          |

SCHOLARONE™  
Manuscripts

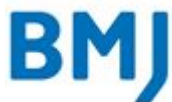

I, the Submitting Author has the right to grant and does grant on behalf of all authors of the Work (as defined in the below author licence), an exclusive licence and/or a non-exclusive licence for contributions from authors who are: i) UK Crown employees; ii) where BMJ has agreed a CC-BY licence shall apply, and/or iii) in accordance with the terms applicable for US Federal Government officers or employees acting as part of their official duties; on a worldwide, perpetual, irrevocable, royalty-free basis to BMJ Publishing Group Ltd ("BMJ") its licensees and where the relevant Journal is co-owned by BMJ to the co-owners of the Journal, to publish the Work in this journal and any other BMJ products and to exploit all rights, as set out in our [licence](#).

The Submitting Author accepts and understands that any supply made under these terms is made by BMJ to the Submitting Author unless you are acting as an employee on behalf of your employer or a postgraduate student of an affiliated institution which is paying any applicable article publishing charge ("APC") for Open Access articles. Where the Submitting Author wishes to make the Work available on an Open Access basis (and intends to pay the relevant APC), the terms of reuse of such Open Access shall be governed by a Creative Commons licence – details of these licences and which [Creative Commons](#) licence will apply to this Work are set out in our licence referred to above.

Other than as permitted in any relevant BMJ Author's Self Archiving Policies, I confirm this Work has not been accepted for publication elsewhere, is not being considered for publication elsewhere and does not duplicate material already published. I confirm all authors consent to publication of this Work and authorise the granting of this licence.

1  
2  
3 **Does moderate alcohol consumption accelerate the progression of liver disease**  
4 **in NAFLD? A systematic review and narrative synthesis**  
5  
6  
7  
8

9 Helen Jarvis<sup>1</sup> (0000-0001-5039-0228) , Hannah O'Keefe<sup>1</sup> (0000-0002-0107-711X), Dawn Craig<sup>1</sup>,  
10 Daniel Stow<sup>1</sup>, \*Barbara Hanratty<sup>1</sup>, \*Quentin M Anstee<sup>2</sup>  
11  
12  
13

- 14 1. Population Health Sciences Institute, Faculty of Medical Sciences, Newcastle  
15 University, Newcastle upon Tyne, UK, NE2 4HH  
16  
17

18  
19 Helen Jarvis [helen.jarvis2@ncl.ac.uk](mailto:helen.jarvis2@ncl.ac.uk)

20 NIHR Doctoral Research Fellow

21 Hannah O'Keefe [hannah.o'keefe@newcastle.ac.uk](mailto:hannah.o'keefe@newcastle.ac.uk)

22 Training Fellow in Evidence Synthesis  
23

24 Dawn Craig ([dawn.craig@newcastle.ac.uk](mailto:dawn.craig@newcastle.ac.uk))

25 Professor of Practice in Evidence Synthesis

26 Daniel Stow ([daniel.stow@newcastle.ac.uk](mailto:daniel.stow@newcastle.ac.uk))

27 Research Associate

28 Barbara Hanratty ([barbara.hanratty@newcastle.ac.uk](mailto:barbara.hanratty@newcastle.ac.uk))

29 Professor of Primary Care and Public Health  
30  
31  
32  
33  
34  
35  
36  
37

- 38 2. Translational and Clinical Research institute, Faculty of Medical Sciences, Newcastle  
39 University, Newcastle upon Tyne, UK, NE2 4HH  
40  
41

42 Quentin M Anstee ([quentin.anstee@newcastle.ac.uk](mailto:quentin.anstee@newcastle.ac.uk))

43 Professor of Experimental Hepatology  
44  
45  
46

47 \* Joint last authorship BH and QMA  
48  
49  
50  
51

- 52 1. Correspondence to: Helen Jarvis, GP and NIHR DRF, Population Health Sciences  
53 Institute, Faculty of Medical Sciences, Newcastle University, Newcastle upon Tyne, UK,  
54 NE2 4HH. Email: [helen.jarvis2@ncl.ac.uk](mailto:helen.jarvis2@ncl.ac.uk)  
55  
56  
57  
58  
59  
60

**Structured abstract:****Objectives:**

Liver disease is a leading cause of premature death, partly driven by the increasing incidence of Non-alcohol related fatty liver disease (NAFLD). Many people with a diagnosis of NAFLD drink moderate amounts of alcohol. There is limited guidance for clinicians looking to advise these patients on the effect this will have on their liver disease progression. This review synthesises the evidence on moderate alcohol consumption and its potential to predict liver disease progression in people with diagnosed NAFLD.

**Methods:**

A systematic review of longitudinal observational cohort studies was conducted. Databases (MEDLINE, EMBASE, The Cochrane Library and ClinicalTrials.gov) were searched up to September 2020. Studies were included that reported progression of liver disease in adults with NAFLD, looking at moderate levels of alcohol consumption as the exposure of interest. Risk of bias was assessed using the QUIPS tool.

**Results:**

Of 4241 unique citations, 6 met the inclusion criteria. Pooling of data was not possible due to heterogeneity and studies were analysed using narrative synthesis. Evidence suggested that any level of alcohol consumption is associated with worsening of liver outcomes in NAFLD, even for drinking within recommended limits. Well conducted population based studies estimated up to a doubling of incident liver disease outcomes in NAFLD patients drinking at moderate levels.

**Conclusions:**

This review found that any level of alcohol intake in NAFLD may be harmful to liver health. Study heterogeneity in definitions of alcohol exposure as well as in outcomes limited quantitative pooling of results. Use of standardised definitions for exposure and outcomes would support future meta-analysis.

Based on this synthesis of the most up to date longitudinal evidence, clinicians seeing patients with NAFLD should currently advise abstinence from alcohol.

**Funding and registration:**

This study was funded by an NIHR DRF (NIHR300716). The protocol was registered with PROSPERO (#CRD42020168022).

### **Strengths and limitations of this study:**

- This is a timely synthesis of the best available evidence on the role of moderate alcohol consumption in NAFLD
- We used systematic searches to identify literature and prospectively registered our protocol on PROSPERO
- We restricted our inclusion criteria to studies that used longitudinal data to provide evidence of temporal associations
- Due to heterogeneity in definitions of alcohol exposure and outcomes, it was not possible to carry out a meta-analysis
- The existing literature base is limited and only six studies were sufficiently robust to meet our pre-defined inclusion criteria

### **Main Text:**

#### **Introduction:**

Liver disease is an increasing health burden across the world, and it is now a major cause of premature (<65 yrs) mortality (1,2). As premature mortality rates from many non-communicable diseases have fallen over the last 30 years, the burden of liver disease is increasing (2,3). The commonest causes of chronic liver disease in high income countries are alcohol related liver disease (ARLD) and metabolic-syndrome related liver disease (or non-alcohol related fatty liver disease - NAFLD). Chronic liver disease is often diagnosed as a result of abnormal liver blood tests or liver imaging, with a fatty liver (steatosis) progressing in some through inflammation (steatohepatitis) and stiffening (fibrosis) to scarring (cirrhosis) increasing the risk of decompensated liver disease or liver cancer. This process of progressive damage to the liver is common to both aetiologies.

Whilst the labelling of liver disease suggests a dichotomy, the clinical reality is that there is significant overlap between ARLD and NAFLD (4). The incidence of obesity and diabetes is rising, and a substantial proportion of the population is drinking alcohol at above recommended



limits (5). It is estimated that up to 17% of the adult population may meet criteria for both NAFLD and ARLD (6). Despite this, there is little guidance available for generalist healthcare professionals, on how to advise people with a diagnosis of NAFLD on safer alcohol consumption.

Recommendations on safe alcohol consumption levels vary worldwide. Increasingly, they take into account the effect that alcohol has on the risk of developing many adverse health outcomes, including cancer. International analysis suggests this should be as low as total abstinence to minimize all health risks (7). Recommended limits for safe alcohol consumption in the UK general population are up to 14 units of alcohol per week in both males and females (8), which equates to 16 grams of alcohol per day at 8g/unit. Moderate alcohol consumption is generally defined in the literature as drinking within, or slightly in excess of, these limits versus complete abstinence (4). There is a significant gap between this recommended 'moderate' limit and the levels of alcohol consumption that would prompt an assessment for alcohol-related liver damage. The UK National Institute of Health and Care Excellence (NICE) recommends offering a liver cirrhosis test to men drinking over 50 units and women drinking over 35 units a week on an ongoing basis over several months (9), leaving a significant proportion who are drinking at and above 14 units a week, but below the levels to have liver assessment based on their alcohol consumption alone. The international differences in definition of how many grams of alcohol a 'unit' contains can create confusion and the reader is directed to table 1 to help in interpreting the study results in the context of UK Government and NICE recommended limits.

Table 1: International definitions of moderate alcohol consumption, UK recommended limits and levels that would warrant assessment for ARLD, all expressed in grams of alcohol and UK units.

| Definitions:                                                     | grams of alcohol |          | UK Units of alcohol |            |
|------------------------------------------------------------------|------------------|----------|---------------------|------------|
|                                                                  | Daily*           | Weekly*  | Daily*              | Weekly*    |
| Accepted International consensus of moderate alcohol consumption | F: <20           | F: <140  | F: < 2.5            | F: <17.5   |
|                                                                  | M: <30           | M: <210  | M: < 3.75           | M: < 26.25 |
| UK recommended safe weekly limits                                | </= 16           | </= 112  | </= 2               | </= 14     |
| NICE thresholds for assessing for liver                          | F: > 40          | F :> 280 | F: > 5              | F: > 35    |

|           |        |         |          |         |
|-----------|--------|---------|----------|---------|
| cirrhosis | M:> 57 | M: >400 | M: > 7.1 | M: > 50 |
|-----------|--------|---------|----------|---------|

\* Daily and weekly figures are given for comparison only. The bold numbering for each definition is the standard format in which this definition is expressed

There is still uncertainty, and an absence of guidance, on safe levels of alcohol consumption for people with established NAFLD. Indeed, it is not clear that any level of alcohol consumption is safe to minimise progression of the liver disease in this population. It is known that people with very high levels of alcohol consumption (who would meet criteria for a diagnosis of ARLD), and who also have metabolic risk factors, are at even greater risk of adverse liver outcomes (10,11). But there is also some evidence that for people with metabolic risk factors (but who do not have a NAFLD diagnosis), drinking alcohol at low levels may protect against cardiovascular disease, prevent fatty liver disease, and lead to better outcomes than with complete abstinence (12,13). Elucidating the role of alcohol in NAFLD progression is a small part of understanding the interplay of genetic and environmental factors and their effects on the liver; an area of ongoing research and debate (14).

The purpose of this systematic review is to synthesise evidence on the role of moderate alcohol consumption on progression to severe liver disease in people with diagnosed NAFLD. This will help guide the advice given to NAFLD populations around safe alcohol consumption in primary care and specialist settings.

## Methods:

The protocol for this review was registered in advance with PROSPERO (International Prospective Register of Systematic Reviews, #CRD42020168022).

### *Types of studies, inclusion and exclusion criteria*

Primary studies were included if they were prospective or retrospective cohort studies. The population of interest was adult patients (>18 years old) with diagnosed NAFLD. The outcome of interest was progression of liver disease in this population. The exposure of interest was no

1  
2  
3 vs moderate alcohol consumption. For our inclusion criteria we defined 'moderate consumption'  
4 as up to 35 units per week in females, and 50 units per week in males (levels that would be  
5 considered the threshold for definite risk of ARLD according to NICE guidelines (9)). This  
6 definition included studies that focused on the effects of alcohol within or just above current  
7 weekly recommended limits (the usual definition of 'moderate' alcohol consumption), as well as  
8 those who looked beyond these levels of consumption, up to the NICE ARLD levels.  
9  
10  
11  
12  
13

14 Exclusion criteria were as follows: 1) studies where the population had diagnosed ARLD; 2)  
15 studies where the population was defined according to their alcohol consumption levels rather  
16 than their NAFLD status at baseline; 3) studies where patients already had severe liver disease  
17 at the time of cohort entry; 4) cross sectional studies or studies where exposure was only  
18 measured at the same time as outcome.  
19  
20  
21  
22  
23

24 We performed a systematic review following the Preferred Reporting Items for Systematic  
25 Reviews and Meta-Analyses (PRISMA) guidelines (15).  
26  
27

### 28 *Search strategy and data extraction*

29  
30

31 Potentially relevant studies were identified through systematic literature searches of relevant  
32 databases (MEDLINE, EMBASE, The Cochrane Library and ClinicalTrials.gov, CPCI-S  
33 (Conference Proceedings Citation Index – Science, Web of Knowledge), OpenGrey  
34 (<http://www.opengrey.eu/>) in January 2020 and updated in September 2020. No language  
35 restrictions were applied, and databases searched documents published from 1990 onwards.  
36 Reference lists from potentially relevant papers and previous review articles were hand  
37 searched. MeSH (Medical Subject Headings) and free text terms for the NAFLD population,  
38 alcohol exposures and liver outcomes of interest were used. Two researchers (HJ and either  
39 HO or DS) independently screened titles and abstracts. Any disagreement in full text selection  
40 was resolved by consensus. Record screening was also assisted by Rayyan, an online software  
41 tool that assesses similarities between selected records and highlights other potentially relevant  
42 studies based on the screener's previous selection (16). Full texts of potentially relevant papers  
43 were obtained and read by two independent researchers with reference to the predefined set of  
44 criteria to identify final study inclusion. Data were extracted into a standardised form, piloted on  
45 3 studies before full extraction. Data extraction was based on the updated checklist for critical  
46 appraisal and data extraction for systematic reviews of prediction studies (CHARMS-PF)  
47  
48  
49  
50  
51  
52  
53  
54  
55  
56  
57  
58  
59  
60

1  
2  
3 checklist for prognostic studies (17), undertaken by one researcher and checked by a second.  
4 Two authors (HJ, HO) assessed the risk of bias independently. Since the included studies were  
5 observational cohort studies of prognostic factors, the QUIPS (Quality in Prognostic factor  
6 Studies) tool was used (18).  
7  
8  
9

### 10 11 *Data synthesis*

12  
13  
14 Pooling of data was not possible due to exposure and outcome heterogeneity across studies. A  
15 narrative synthesis (19) was undertaken, with data synthesised by alcohol exposure level. Due  
16 to the small number of studies, even those with high risk of bias are included in the synthesis,  
17 although this bias assessment is made clear throughout the narrative.  
18  
19  
20

### 21 22 *Patient and Public Involvement*

23  
24  
25 Patients and the Public were not involved in the design or conduct of this review but will be  
26 involved in the dissemination of findings through a funded PPI steering group and close  
27 collaboration with the British Liver Trust.  
28  
29  
30

### 31 32 33 34 35 **Results:**

36  
37  
38 The searches identified 4241 unique citations. Of the titles and abstracts screened, 34 articles  
39 were selected for full-text screening. Twenty-eight were excluded for reasons reported in the  
40 PRISMA diagram (Figure 1). A total of six unique studies representing data from five cohorts  
41 were eligible for inclusion in the systematic review, and were assessed for quality (Figure 1),  
42 (20-25).  
43  
44  
45

### 46 47 *Characteristics of included studies*

48  
49  
50 *Further details of included studies are shown in Table 2.*  
51  
52  
53  
54  
55  
56  
57  
58  
59  
60

Table 2: Characteristics of included studies

| Author /year     | Country                                    | Study design and population                                                                                 | Yrs f/u | Method of NAFLD diag* | Method of measuring alcohol consumption                           | Definition of moderate consumption studied as RF                     | Study outcomes of interest and event no                         | Adjustments of interest considered                          | Adjusted HRs/OR for liver events with 95% CI and p-values                                                                                                              | Risk of bias |
|------------------|--------------------------------------------|-------------------------------------------------------------------------------------------------------------|---------|-----------------------|-------------------------------------------------------------------|----------------------------------------------------------------------|-----------------------------------------------------------------|-------------------------------------------------------------|------------------------------------------------------------------------------------------------------------------------------------------------------------------------|--------------|
| Aberg 2019 (20)  | Finland                                    | retrospective data linkage cohort analysis NAFLD population 6462, mean age 53 yrs, 60% M                    | 10.9    | FLI >30               | Questionnaire at cohort entry                                     | < 50g/day in 10 g categories with abstinence as reference            | composite non-fatal and fatal liver disease 58 events           | ? unclear other than age, sex                               | per increase in 10g of alcohol per day from abstinence HR 1.43 (1.12 - 1.82) p0.004                                                                                    | high         |
| Aberg 2020 (21)  | Finland (FINRISK Health survey)            | retrospective data linkage cohort analysis NAFLD population 8345, mean age 53.7 yrs, 60% M                  | 11.1    | FLI >60               | Questionnaire at cohort entry (recall for past month)             | < 50g/day in 10 g categories with abstinence as reference            | composite non-fatal and fatal liver disease 152 events          | age, sex, smoking, T2DM                                     | g alcohol/day v abstinence<br>0-9 HR 1.38 (0.74-2.58)<br>10-19 HR 2.18(1.04-4.53)<br>20-29 HR 3.62(1.67-7.76)<br>30-39 HR 3.53(1.53-8.14)<br>40-49 HR8.79(3.95-19.56)  | low          |
| Ajmera 2018 (22) | USA                                        | retrospective analysis of longitudinal cohorts within NASH CRN NAFLD population 285, mean age 47 yrs, 30% M | 3.9     | liver biopsy          | Questionnaire at cohort entry (Skinner lifetime drinking history) | <2 drinks per day and excluded if >6 drinks on 1 occasion >= monthly | histological progress on follow up biopsy                       | age, sex, race, smoking                                     | OR of outcome persistent moderate drinkers v abstinence**<br>resolution of NASH OR 0.32 (0.11-0.92) p0.04<br>fibrosis progression OR 0.00 (-0.29-0.29) p0.99           | mod          |
| Chang 2019 (23)  | South Korea (Kangbuk Samsung Health Study) | prospective population cohort NAFLD population 58927, mean age 37.7, 82% M                                  | 4.9     | US                    | Questionnaire at each study visit (annual or biennial)            | 10 - 19.9 g/day (F)<br>10 - 29.9 g/day (M)<br>(low 1-9.9g/day)       | fibrosis progress as estimated by high indirect serum scores*** | age, sex, BMI, smoking, exercise level, education, T2DM, BP | mod v abstinence\$ (repeat observations)<br>Fib4: HR 1.33(1.13-1.57)<br>NFS: HR 1.37(1.23-1.52)<br>low v abstinence (repeat observations)<br>Fib 4: HR 1.08(0.91-1.27) | low          |

1  
2  
3  
4  
5  
6  
7  
8  
9  
10  
11  
12  
13  
14  
15  
16  
17  
18  
19  
20  
21  
22  
23  
24  
25  
26  
27  
28  
29  
30  
31  
32  
33  
34  
35  
36  
37  
38  
39  
40  
41  
42  
43  
44  
45  
46  
47

|                       |        |                                                                                                                                        |      |                           |                                                           |                                                         |                                                |                                                 |                                                                                                                                             |     |
|-----------------------|--------|----------------------------------------------------------------------------------------------------------------------------------------|------|---------------------------|-----------------------------------------------------------|---------------------------------------------------------|------------------------------------------------|-------------------------------------------------|---------------------------------------------------------------------------------------------------------------------------------------------|-----|
|                       |        |                                                                                                                                        |      |                           |                                                           |                                                         |                                                |                                                 | NFS: HR 1.14(1.02-1.27)                                                                                                                     |     |
| Ekstedt 2009 (24)     | Sweden | retrospective cohort<br>NAFLD population 71,<br>mean age 47.3, 72% M                                                                   | 13.8 | US and<br>liver<br>biopsy | Questionnaire<br>AUDIT-C and<br>interview at<br>follow up | g/day - no<br>upper limit<br>defined as<br>'moderate'   | fibrosis<br>progress on<br>follow up<br>biopsy | age, sex, BMI,<br>T2DM, fibrosis<br>at baseline | increasing alcohol g/week<br>OR 1.012 (1.000-1.025)<br>p0.055                                                                               | low |
| Kawamura<br>2016 (25) | Japan  | prospective cohort<br>NAFLD population<br>9959, mean age 49,<br>87% M<br>(included 18 patients<br>>70g alcohol/day<br>defined as ARLD) | 5.4  | US                        | Questionnaire<br>at baseline and<br>every 6<br>months     | g/day in<br>categories with<br><20g/day as<br>reference | HCC on<br>imaging                              | age, sex, BMI,<br>T2DM, serum<br>markers        | g/day alcohol v <20g/day<br>20-39 HR 0.90(0.11-7.90)<br>p0.919<br>≥40-69 HR 2.48(1.01-6.05)<br>p0.047<br>>70 HR 12.61(5.68-28.00)<br>p0.001 | low |

Abbreviations: NAFLD = non-alcohol related fatty liver disease; NASH = non-alcohol related steatohepatitis; ARLD = alcohol related liver disease; RF= risk factor; CRN= clinical research network; Yrs = years; M = Male; FLI = Fatty Liver Index; US = hepatic ultrasound; g = grams; HCC = hepatocellular carcinoma; BMI = body mass index; T2DM = type 2 diabetes mellitus; BP = blood pressure; HR = Hazard ratio; OR = Odds ratio; CI = confidence interval; NFS = NAFLD fibrosis score.

\*\*Note multiple differences in means and OR presented for different histological and biochemical outcomes between abstainers, persistent moderate drinkers, and changes in alcohol consumption between biopsies. Presented data represent histological outcomes of potential clinical prognostic significance within the remit of this review.

\*\*\* Scores used to estimate fibrosis progression were the Fib4 score, NAFLD fibrosis score (NFS) and APRI score  
\$ multiple HR presented in paper for different score outcomes for single and repeated outcome measures looking at intermediate/high- or high-risk scores in low and moderate drinkers and different subgroups. Presented data represent outcomes best in keeping with remit of this review using widely used indirect serum markers of liver fibrosis.

1  
2  
3  
4 Within the studies meeting inclusion criteria, three (22,23,24) looked at the exposure of alcohol  
5 consumption up to, or similar to, the accepted international definition of 'moderate consumption'.  
6 This is <20g/day in women and <30g/day in men (26). Three of the studies (20,21,25) looked at  
7 low alcohol consumption but also extended 'moderate consumption' up to levels of alcohol  
8 consumption which would be considered more consistent with ARLD.  
9  
10  
11  
12  
13  
14  
15

### 16 ***Moderate alcohol consumption (accepted international definitions) and risk of liver*** 17 ***disease progression in NAFLD*** 18 19 20

21 Three studies examined the effects of alcohol in NAFLD using definitions in keeping with the  
22 accepted international definition of 'moderate consumption' (22,23,24). Although these studies  
23 shared a similar aim, they varied in NAFLD population definition, measurement of alcohol  
24 consumption and choice of liver outcomes. Two looked at histological progression outcomes  
25 and one used non-invasive indirect blood-based markers of liver fibrosis. Two of the studies  
26 were rated as having a low risk of bias (23,24) and one was rated as having a moderate risk  
27 (22).  
28  
29  
30  
31  
32  
33

34 Ajmera et al (22) studied a NAFLD population taken retrospectively from the NASH clinical  
35 research network, including populations from an observational study and the placebo arm of two  
36 NASH drug trials, all of whom had biopsy proven NAFLD (285 participants). Alcohol  
37 consumption was measured at cohort entry and at varying time points up to, and including,  
38 follow-up liver biopsy, which occurred, on average, four years later. Multiple histological markers  
39 of disease progression were studied, and the authors looked at the association between  
40 baseline drinking status and disease progression as well as change in drinking status over time  
41 and disease progression. For most of the histological end points studied, there was no  
42 significant difference between moderate drinkers and abstainers in outcomes, with the only  
43 significant results suggesting that abstainers had less progressive or a higher likelihood of  
44 regression of their disease between biopsies, particularly the persistent abstainers. Results  
45 should be interpreted in the knowledge that a large number of related histological outcomes  
46 were reported, increasing the likelihood of a statistically significant result by chance. The  
47  
48  
49  
50  
51  
52  
53  
54  
55  
56  
57  
58  
59  
60

1  
2  
3 absence of detailed information on which other prognostic factors were taken into account, led  
4 to a rating of moderate on risk of bias assessment.  
5  
6  
7

8 A similar study by Ekstedt et al (24) looked at a smaller group (71 participants) of biopsy proven  
9 NAFLD, with follow up histology an average of 13.8 years after initial biopsy. Alcohol  
10 consumption was assessed at baseline and follow up, with heavy episodic drinking assessed in  
11 addition to weekly consumption. Primary outcome was significant fibrosis progression, defined  
12 as progression by one or more fibrosis stage or the development of end stage liver disease  
13 during follow up. Although higher weekly alcohol consumption showed some tendency to predict  
14 fibrosis progression (OR for increase in grams of alcohol per week 1.012 (1.000 - 1.025)) only  
15 the presence of heavy episodic drinking (defined as >60g/day in men and >48g/day in women  
16 more than once a month) reached statistical significance in predicting fibrosis progression.  
17  
18  
19  
20  
21  
22

23 Of note in both the Ajmera and Ekstedt studies were the very low levels of alcohol consumption  
24 in the 'moderate drinkers', with the majority (78%) of the moderate drinkers drinking less than  
25 monthly in the Ajmera study and the average weekly alcohol consumption in the Ekstedt study  
26 being only 39 g/week. Both studies also included a significant number of patients who already  
27 had liver inflammation (NASH) at baseline (over 50% in both studies), indicating a higher  
28 proportion of patients with a tendency to progressive disease as compared to a general NAFLD  
29 population, as would be expected with biopsy-based studies.  
30  
31  
32  
33  
34  
35

36 In contrast to the relatively selective biopsy studies, Chang et al (23) studied a large prospective  
37 population cohort (Kangbuk Samsung Health Study) of whom 58,927 had ultrasound evidence  
38 of fatty liver but without evidence of other liver diagnoses or advanced disease. Alcohol  
39 exposure was weekly units at baseline and follow up was for a median of 8.3 years with  
40 outcome of interest being progression to advanced liver fibrosis using non-invasive blood-based  
41 markers of disease. For moderate drinkers (10 - 30 g/day), the risk of progressing to advanced  
42 fibrosis (using intermediate/high Fib4 score as the outcome) was HR 1.33 (1.13 - 1.57), when  
43 compared to abstainers. Light drinkers (1-10 g/day) showed a tendency towards more advanced  
44 disease when compared to abstainers, but this did not reach statistical significance (HR 1.08 CI  
45 0.91-1.27).  
46  
47  
48  
49  
50  
51  
52

53  
54 ***Moderate alcohol consumption (below the threshold that would be consistent with ARLD)***  
55 ***and risk of liver disease progression in NAFLD***  
56  
57  
58  
59



1  
2  
3  
4  
5 Three studies extended the definition of moderate alcohol consumption beyond the international  
6 consensus definition of 'moderate consumption'. Two of the studies were rated as having a low  
7 risk of bias (21,25), with one rated as high risk of bias (20).  
8  
9

10  
11 The general population longitudinal data presented by Chang et al (23) is supplemented by two  
12 recent related studies by Aberg et al (20,21), using data from the same Finnish National Health  
13 Surveys (FINRISK, Health 2000) cohort. The definition of moderate alcohol consumption was  
14 increased to include anything up to 50 grams per day in these studies. Although the exposures  
15 and outcome measures were the same in the two related studies, the NAFLD population was  
16 defined using different fatty liver index (FLI) cut offs values, generating overlapping but distinct  
17 study populations. For this reason, data are presented from both studies.  
18  
19

20  
21 The first study, only available as a conference abstract, (20) used a FLI>30 to retrospectively  
22 define their NAFLD population. This low FLI would generally be used as a 'rule out' rather than  
23 'rule in' cutoff for NAFLD diagnosis (27) and the limited data presented suggests that using  
24 abstinence as a reference, any increase in alcohol consumption by 10 g/day, increased incident  
25 liver events (combined fatal and non-fatal outcomes) by 43% with a presented HR of 1.43 (1.12  
26 - 1.82) for each 10 g rise in daily alcohol consumption. The data presented contained few details  
27 of adjustment factors or analysis plan. This study was graded as having a high risk of bias, and  
28 these results should be interpreted with caution.  
29  
30  
31  
32  
33  
34  
35

36  
37 A larger study (21), based on the same cohort, retrospectively identified a NAFLD population  
38 based on a FLI of >60 (the accepted and validated cut off for making a positive diagnosis of  
39 NAFLD in the literature (27)). Alcohol intake at cohort entry was based on estimated  
40 consumption over the previous year. Lifetime abstainers were used as the reference group.  
41 Fatal and non-fatal liver outcomes were studied in 8345 participants over 92 350 person years  
42 of follow up. The study concluded that incident liver disease is higher at all levels of alcohol  
43 consumption, compared to lifetime abstainers with steadily rising hazard ratios as the level of  
44 alcohol consumption increases. Although drinking up to 10g per day was not statistically  
45 significantly different to abstaining (HR 1.38 CI 0.74 -2.58 in the final model), levels of alcohol  
46 consumption between 10 g and 19 g, which are roughly equivalent to the 14 units per week  
47 recommended limits, prognosticated for over double the number of incident liver events in  
48 NAFLD patients (HR 2.18 CI 1.05-4.53). At higher levels, which would not necessarily trigger a  
49 liver assessment for alcohol related harm in current guidelines, risk of significant liver disease  
50  
51  
52  
53  
54  
55  
56  
57  
58  
59  
60

1  
2  
3 was nearly nine times higher (for consumption of 40 - 49 g of alcohol a day, HR 8.79 CI 3.95-  
4 19.56).  
5  
6

7  
8 A retrospective Japanese cohort study (25) also looked at stepwise rises in daily alcohol  
9 consumption as a prognostic factor for the more specific outcome of hepatocellular carcinoma  
10 (HCC) in people with fatty liver (identified on ultrasound). The Kawamura study with 9959  
11 participants followed for a median of nearly 2000 days, had a reference group of people drinking  
12 < 20g of alcohol per day, rather than abstainers. This differed from all the other studies  
13 reviewed. Only those drinking at between 40-69 g of alcohol a day had a statistically significant  
14 increase in rates of HCC (HR 2.48 CI 1.01 - 6.05 p 0.047), with no effect in those drinking at  
15 more moderate levels. The population in this retrospective cohort were patients undergoing  
16 ultrasound at two tertiary hepatology centres in Japan rather than a general population cohort,  
17 and as HCC is known to occur in non-cirrhotic NAFLD (28) comparison with outcomes from  
18 other studies should be interpreted with caution.  
19  
20  
21  
22  
23  
24  
25

26  
27 Excluding the only study rated as having a high risk of bias (20), the other good quality  
28 longitudinal studies of varying design, all reported either no association or a negative impact of  
29 moderate amounts of alcohol on future liver disease outcomes. This was seen across the  
30 studies looking at levels of alcohol consumption within the international definition of moderate  
31 consumption, and those that extended this definition of moderate consumption.  
32  
33  
34  
35

## 36 **Discussion:**

### 37 *Summary of results*

38  
39  
40  
41  
42 In this systematic review of the latest available longitudinal data, we found evidence to suggest  
43 that any amount of alcohol, even at low levels, may be harmful for liver health in people with  
44 diagnosed NAFLD. This evidence comes from both general population-based cohorts using  
45 coded liver outcomes, as well as tertiary centre NAFLD populations defined using histological  
46 end points.  
47  
48  
49  
50

### 51 *Comparison with existing literature*

1  
2  
3 Until recently the majority of evidence in this area has come from cross-sectional studies where  
4 alcohol exposure was assessed at the same time as liver outcomes. These data provide  
5 somewhat contradictory results, with several studies indicating that moderate alcohol  
6 consumption is associated with lower levels of liver disease progression (29,30,31,32) although  
7 more recent studies support of our findings, and suggest the opposite (33,34). The design  
8 employed in these studies does not allow the assessment of temporal relationships and is open  
9 to reverse causality (those with liver damage may be newly abstaining from alcohol for example)  
10 in addition to recall and other biases. On the basis of these limitations, cross-sectional studies  
11 were excluded from this current review, although they have been widely cited in previous critical  
12 reviews in this area, before more recent longitudinal data were available.  
13  
14  
15  
16  
17  
18  
19

20  
21 In the historical absence of large prospective cohort studies and the impossibility of conducting  
22 a controlled trial in the area, comparative work has been undertaken using Mendelian  
23 randomisation. This utilises random genetic variations which affects the rate of alcohol  
24 metabolism as a proxy measure for alcohol exposure, with randomisation of NAFLD patients  
25 based on an allele known to confer lower lifetime alcohol consumption by necessity due to the  
26 unpleasant effects of drinking even low levels of alcohol. Findings from this study were  
27 supportive of our review, with the group with higher lifetime alcohol consumption showing  
28 markers of more severe disease on biopsy, even though alcohol consumption was at very  
29 modest levels (35).  
30  
31  
32  
33  
34  
35

36  
37 In addition to the evidence on the relationship between modest alcohol consumption in NAFLD  
38 and liver outcomes, other published studies have focused on overall mortality and  
39 cardiovascular outcomes. A study of 4264 participants in an ultrasound diagnosed NAFLD  
40 cohort study showed no significant difference in overall mortality in those with alcohol  
41 consumption in the low/moderate range versus abstinence after 20 years of follow up (36). A  
42 subsequent study with the same US cohort reported a protective effect of low alcohol  
43 consumption on overall survival in NAFLD (37). The evidence for a protective effect of low  
44 alcohol consumption on overall survival in NAFLD (37). The evidence for a protective effect of low  
45 alcohol consumption on cardiovascular outcomes in the general population is generally  
46 accepted (38). The evidence for cardiovascular protection in those with NAFLD is more limited,  
47 with some evidence that moderate alcohol may provide some benefit (39) but more recent  
48 studies finding no protective effects (33,40). The comparative evidence on overall mortality and  
49 cardiovascular outcomes highlights the need to assess liver disease risks within these  
50 competing contexts.  
51  
52  
53  
54  
55  
56  
57  
58  
59  
60

### *Strengths and limitations*

Although there have been several recent critical reviews of the role of moderate alcohol consumption in NAFLD, the most recent of which reach similar conclusions (4,41,42), these have been wider in their remit with less well-defined inclusion criteria and less systematic methodology. The predetermined inclusion criteria, robust systematic data collection and reporting techniques (in line with PRISMA guidelines) and decision to avoid cross-sectional data are all important in providing the best available evidence to answer the review question of the temporal relationship between moderate alcohol consumption and liver outcomes in NAFLD. The challenges of synthesising observational data, including unmeasured confounding and heterogeneity, were anticipated, but meant that data pooling was not possible.

A particular limitation hindering comparison between studies were the methods of defining moderate alcohol consumption. The consensus for defining a level of alcohol consumption above which a diagnosis of pure NAFLD cannot be made have been supported by the European Association for the Study of the Liver (EASL) and the American Association for the Study of the Liver Diseases (AASLD) and set at 20g/day in women and 30g/day in men (26,43), yet most of the published studies do not use these cut-offs in their data. Until this is standardised across studies, with an additional consensus defining levels above this 'moderate' but not high enough to reach levels associated with a definite diagnosis of ARLD, synthesising the evidence in this area will remain challenging.

### *Implications for research/practice*

This review adds weight to individual studies showing that any level of alcohol intake in NAFLD may be harmful to liver health. Further prospective cohort studies are needed, with detailed definitions/measures of alcohol exposure, and validated clinical liver outcomes, measured at appropriate times. Future research should focus on looking at outcomes in relation to accepted alcohol intake levels used in definitions of NAFLD. It should also take into account that the clinical reality is a dual-aetiology patient who may currently be excluded from both diagnostic categories based on their alcohol intake being too high for NAFLD, and too low for ARLD definitions. This is an ever-expanding patient group seen in many clinical settings.

1  
2  
3 Based on the evidence synthesised in this review, clinicians seeing patients with NAFLD in  
4 primary or secondary care should currently advise abstinence from alcohol to avoid accelerating  
5 liver harm. This is likely to be difficult for patients to accept, and public health messaging will  
6 need careful thought if it is to have any impact on liver health.  
7  
8  
9

10  
11  
12 Author contribution statement:

13  
14  
15 HJ: conceptualization, methodology, conduct, analysis, writing of initial draft

16 HO: methodology, conduct, figures/infographic, critical review and comments on drafts

17 DC: supervision of methodology, conduct, critical review and comments on drafts

18 DS: methodology, conduct, critical review and comments on drafts

19 BH: conceptualization, supervision of methodology, conduct, analysis, critical review and  
20 comments on drafts

21 QA: conceptualization, supervision of conduct and analysis, critical review and comments on  
22 drafts  
23  
24  
25

26 Competing interest statement:

27  
28 All authors have completed the Unified Competing Interest form and declare that the study was  
29 funded by an NIHR Doctoral Research Fellowship (HJ personal award). There were no financial  
30 relationships with any organisations that might have an interest in the submitted work in the  
31 previous three years. All authors report no other relationships or activities that could appear to  
32 have influenced the submitted work.  
33  
34  
35

36 HJ reports grants from National Institute for Health research (NIHR), during the conduct of the  
37 study; personal fees from Intercept Pharma, personal fees from Norgine, outside the submitted  
38 work;

39 QMA reports grants from European Commission, during the conduct of the study; other from  
40 Acuitas Medical, grants, personal fees and other from Allergan/Tobira, other from E3Bio, other  
41 from Eli Lilly & Company Ltd, other from Galmed, grants, personal fees and other from Genfit  
42 SA, personal fees and other from Gilead, other from Grunthal, other from Imperial Innovations,  
43 grants and other from Intercept Pharma Europe Ltd, other from Inventiva, other from Janssen,  
44 personal fees from Kenes, other from MedImmune, other from NewGene, grants and other from  
45 Pfizer Ltd, other from Raptor Pharma, grants from GlaxoSmithKline, grants and other from  
46 Novartis Pharma AG, grants from Abbvie, personal fees from BMS, grants from GSK, other from  
47 NGMBio, other from Madrigal, other from Servier, outside the submitted work;  
48  
49  
50

51 Funding statement:

52  
53 This work was supported by and NIHR Doctoral Research Fellowship – HJ personal award.  
54 Award no: NIHR300716.  
55  
56  
57  
58  
59  
60

1  
2  
3 Data Sharing statement:  
4

5 All data relevant to the study are included in the article or uploaded as supplementary  
6 information  
7

8  
9 Ethics approval statement:  
10

11 Ethical approval was not required for this study as it involved synthesising existing data and did  
12 not involve any human or animal participants.  
13  
14

15  
16  
17  
18  
19  
20  
21  
22  
23  
24  
25  
26  
27  
28  
29  
30  
31  
32  
33  
34  
35  
36  
37  
38  
39  
40  
41  
42  
43  
44  
45  
46  
47  
48  
49  
50  
51  
52  
53  
54  
55  
56  
57  
58  
59  
60  
References:

1. Williams R, Aspinall R, Bellis M, et al. Addressing liver disease in the UK: a blueprint for attaining excellence in health care and reducing premature mortality from lifestyle issues of excess consumption of alcohol, obesity, and viral hepatitis. *Lancet*. 2014;384(9958):1953–97.
2. GBD 2017 Cirrhosis Collaborators. The global, regional, and national burden of cirrhosis by cause in 195 countries and territories, 1990-2017: a systematic analysis for the Global Burden of Disease Study 2017. *Lancet Gastroenterol Hepatol*. 2020 Mar;5(3):245-266.
3. Martinez R, Lloyd-Sherlock P, Soliz P, et al. Trends in premature avertable mortality from non-communicable diseases for 195 countries and territories, 1990-2017: a population-based study. *Lancet Glob Health* 2020;8:e511-e523.
4. Boyle M, Masson S, Anstee QM. The bidirectional impacts of alcohol consumption and the metabolic syndrome: Cofactors for progressive fatty liver disease. *J Hepatol*. 2018;68(2):251–67.
5. Williams R, Alexander G, Armstrong I, et al. Disease burden and costs from excess alcohol consumption, obesity, and viral hepatitis: fourth report of the Lancet Standing Commission on Liver Disease in the UK. *Lancet*. 2017 Nov 28;
6. Baumeister SE, Alte D, Meyer C, John U. Health Risk drinking and problematic consumption of alcohol in Pomerania: comparative analysis of the Study of Health in Pomerania (SHIP) compared with the Federal German Health and Examination Survey in 1998. *Gesundheitswesen*. 2005 Jan;67(1):39–47.

- 1
  - 2
  - 3
  - 4
  - 5
  - 6
  - 7
  - 8
  - 9
  - 10
  - 11
  - 12
  - 13
  - 14
  - 15
  - 16
  - 17
  - 18
  - 19
  - 20
  - 21
  - 22
  - 23
  - 24
  - 25
  - 26
  - 27
  - 28
  - 29
  - 30
  - 31
  - 32
  - 33
  - 34
  - 35
  - 36
  - 37
  - 38
  - 39
  - 40
  - 41
  - 42
  - 43
  - 44
  - 45
  - 46
  - 47
  - 48
  - 49
  - 50
  - 51
  - 52
  - 53
  - 54
  - 55
  - 56
  - 57
  - 58
  - 59
  - 60
7. Collaborators GBDA. Alcohol use and burden for 195 countries and territories, 1990-2016: a systematic analysis for the Global Burden of Disease Study 2016. *Lancet* 2018;392:1015-1035.
8. UK Chief Medical Officers' Low Risk Drinking Guidelines. Available at: [https://assets.publishing.service.gov.uk/government/uploads/system/uploads/attachment\\_data/file/545937/UK\\_CMOs\\_report.pdf](https://assets.publishing.service.gov.uk/government/uploads/system/uploads/attachment_data/file/545937/UK_CMOs_report.pdf)
9. Cirrhosis in over 16s: assessment and management | Guidance and guidelines | NICE. Available from: <https://www.nice.org.uk/guidance/ng50>
10. Hart CL, Morrison DS, Batty GD, Mitchell RJ, Davey Smith G. Effect of body mass index and alcohol consumption on liver disease: analysis of data from two prospective cohort studies. *BMJ*. 2010 Mar 11;340:c1240.
11. Liu B, Balkwill A, Reeves G, Beral V, Million Women Study Collaborators. Body mass index and risk of liver cirrhosis in middle aged UK women: prospective study. *BMJ*. 2010 Mar 11;340:c912.
12. Thun MJ, Peto R, Lopez AD, et al. Alcohol consumption and mortality among middle-aged and elderly U.S. adults. *N Engl J Med*. 1997 Dec 11;337(24):1705–14.
13. Sookoian S, Castaño GO, Pirola CJ. Modest alcohol consumption decreases the risk of non-alcoholic fatty liver disease: a meta-analysis of 43 175 individuals. *Gut*. 2014 Mar;63(3):530–2.
14. Tarantino G, Citro V, Capone D. Nonalcoholic Fatty Liver Disease: A Challenge from Mechanisms to Therapy. *Journal of Clinical Medicine*. 2020 Jan;9(1):15. Available from: <https://www.mdpi.com/2077-0383/9/1/15>
15. Moher D, Liberati A, Tetzlaff J, Altman DG, The PRISMA Group (2009). *Preferred Reporting Items for Systematic Reviews and Meta-Analyses: The PRISMA Statement*. *PLoS Med* 6(7): e1000097. doi:10.1371/journal.pmed1000097
16. Ouzzani M, Hammady H, Fedorowicz Z, Elmagarmid A. Rayyan-a web and mobile app for systematic reviews. *Syst Rev*. 2016 05;5(1):210.
17. Moons KGM, Groot JAH de, Bouwmeester W, et al. Critical Appraisal and Data Extraction for Systematic Reviews of Prediction Modelling Studies: The CHARMS Checklist. *PLOS Medicine*. 2014 Oct 14;11(10):e1001744.
18. Hayden JA, van der Windt DA, Cartwright JL, Côté P, Bombardier C. Assessing bias in studies of prognostic factors. *Ann Intern Med*. 2013 Feb 19;158(4):280–6.

19. Popay J, Roberts H, Sowden A, et al. Guidance on the conduct of narrative synthesis in systematic reviews: a product from the ESRC Methods Programme. Lancaster: Lancaster University. 2006;10(2.1):1018–4643
20. Åberg F, Puukka P, Sahlman P et al. In NAFLD, alcohol drinking habits and genetics predict progression to advanced liver disease: follow-up of population surveys. *Journal of Hepatology*. 2019; 70: e141. (poster abstract)
21. Åberg F, Puukka P, Salomaa V, et al. Risks of Light and Moderate Alcohol Use in Fatty Liver Disease: Follow-Up of Population Cohorts. *Hepatology*. 2020 Mar;71(3):835–48.
22. Ajmera V, Belt P, Wilson LA, et al. Among Patients With Nonalcoholic Fatty Liver Disease, Modest Alcohol Use Is Associated With Less Improvement in Histologic Steatosis and Steatohepatitis. *Clin Gastroenterol Hepatol*. 2018;16(9):1511-1520.e5.
23. Chang Y, Cho YK, Kim Y, et al. Nonheavy Drinking and Worsening of Noninvasive Fibrosis Markers in Nonalcoholic Fatty Liver Disease: A Cohort Study. *Hepatology*. 2019;69(1):64–75.
24. Ekstedt M, Franzén LE, Holmqvist M, et al. Alcohol consumption is associated with progression of hepatic fibrosis in non-alcoholic fatty liver disease. *Scand J Gastroenterol*. 2009;44(3):366–74.
25. Kawamura Y, Arase Y, Ikeda K, et al. Effects of Alcohol Consumption on Hepatocarcinogenesis in Japanese Patients With Fatty Liver Disease. *Clin Gastroenterol Hepatol*. 2016 Apr;14(4):597–605.
26. European Association for the Study of the Liver (EASL), European Association for the Study of Diabetes (EASD), European Association for the Study of Obesity (EASO). EASL-EASD-EASO Clinical Practice Guidelines for the Management of Non-Alcoholic Fatty Liver Disease. *Obes Facts*. 2016;9(2):65–90.
27. Bedogni G, Bellentani S, Miglioli L, et al. The Fatty Liver Index: a simple and accurate predictor of hepatic steatosis in the general population. *BMC Gastroenterol*. 2006 Nov 2;6:33.
28. Negro F. Natural history of NASH and HCC. *Liver Int*. 2020;40 Suppl 1:72–6.
29. Dunn W, Sanyal AJ, Brunt EM, et al. Modest alcohol consumption is associated with decreased prevalence of steatohepatitis in patients with non-alcoholic fatty liver disease (NAFLD). *J Hepatol*. 2012 Aug;57(2):384–91.
30. Hagström H, Nasr P, Ekstedt M, et al. Low to moderate lifetime alcohol consumption is associated with less advanced stages of fibrosis in non-alcoholic fatty liver disease. *Scand J Gastroenterol*. 2017 Feb;52(2):159–65.



- 1
- 2
- 3 31. Kwon HK, Greenson JK, Conjeevaram HS. Effect of lifetime alcohol consumption on the
- 4 histological severity of non-alcoholic fatty liver disease. *Liver Int.* 2014 Jan;34(1):129–35.
- 5
- 6 32. Mitchell T, Jeffrey GP, MacQuillan GC, et al. The impact of alcohol consumption on
- 7 hepatic fibrosis in non-alcoholic fatty liver disease. *Hepatology.* 2016. Vol 64 (supp)
- 8 548A (poster abstract)
- 9
- 10
- 11 33. Kashiwagi K, Yamaguchi A, Shiba S, et al. Moderate alcohol consumption is not
- 12 associated with subclinical cardiovascular damage but with hepatic fibrosis in non-
- 13 alcoholic fatty liver disease. *Alcohol.* 2020 Jul 30;89:1–7.
- 14
- 15 34. Mulazzani L, Alvisi M, Tovoli F, et al. Moderate alcohol consumption is associated with
- 16 risk of fibrosis in patients with non-alcoholic fatty liver disease. *Digestive and Liver*
- 17 *Disease.* 2020; 52 (0): pp e43-e44.
- 18
- 19 35. Sookoian S, Flichman D, Castaño GO, Pirola CJ. Mendelian randomisation suggests no
- 20 beneficial effect of moderate alcohol consumption on the severity of nonalcoholic fatty
- 21 liver disease. *Aliment Pharmacol Ther.* 2016;44(11–12):1224–34.
- 22
- 23 36. Younossi ZM, Stepanova M, Ong J, et al. Effects of Alcohol Consumption and Metabolic
- 24 Syndrome on Mortality in Patients With Nonalcoholic and Alcohol-Related Fatty Liver
- 25 *Disease.* *Clin Gastroenterol Hepatol.* 2018 Nov 23;
- 26
- 27 37. Hajifathalian K, Torabi Sagvand B, McCullough AJ. Effect of Alcohol Consumption on
- 28 Survival in Nonalcoholic Fatty Liver Disease: A National Prospective Cohort Study.
- 29 *Hepatology.* 2019;70(2):511–21.
- 30
- 31 38. Klatsky AL. Alcohol and cardiovascular diseases. *Expert Review of Cardiovascular*
- 32 *Therapy [Internet].* 2009 May 1 [cited 2020 Sep 14];7(5):499–506.
- 33
- 34 39. Sinn DH, Gwak G-Y, Cho J, et al. Modest alcohol consumption and carotid plaques or
- 35 carotid artery stenosis in men with non-alcoholic fatty liver disease. *Atherosclerosis.*
- 36 2014 Jun 1;234(2):270–5.
- 37
- 38 40. VanWagner LB, Ning H, Allen NB, et al. Alcohol Use and Cardiovascular Disease Risk in
- 39 Patients With Nonalcoholic Fatty Liver Disease. *Gastroenterology.* 2017;153(5):1260-
- 40 1272.e3.
- 41
- 42 41. Ajmera VH, Terrault NA, Harrison SA. Is moderate alcohol use in nonalcoholic fatty liver
- 43 disease good or bad? A critical review. *Hepatology.* 2017 Jun;65(6):2090–9.
- 44
- 45 42. Åberg F, Färkkilä M, Männistö V. Interaction Between Alcohol Use and Metabolic Risk
- 46 Factors for Liver Disease: A Critical Review of Epidemiological Studies. *Alcohol Clin Exp*
- 47 *Res.* 2020;44(2):384–403.
- 48
- 49
- 50
- 51
- 52
- 53
- 54
- 55
- 56
- 57
- 58
- 59
- 60

- 1  
2  
3 43. Chalasani N, Younossi Z, Lavine JE, et al. The diagnosis and management of non-  
4 alcoholic fatty liver disease: practice guideline by the American Gastroenterological  
5 Association, American Association for the Study of Liver Diseases, and American  
6 College of Gastroenterology. *Gastroenterology*. 2012 Jun;142(7):1592–609.  
7  
8  
9  
10  
11  
12

13 Figure 1: PRISMA diagram of study selection  
14  
15  
16  
17  
18  
19  
20  
21  
22  
23  
24  
25  
26  
27  
28  
29  
30  
31  
32  
33  
34  
35  
36  
37  
38  
39  
40  
41  
42  
43  
44  
45  
46  
47  
48  
49  
50  
51  
52  
53  
54  
55  
56  
57  
58  
59  
60

Fig 1: PRISMA diagram of study selection

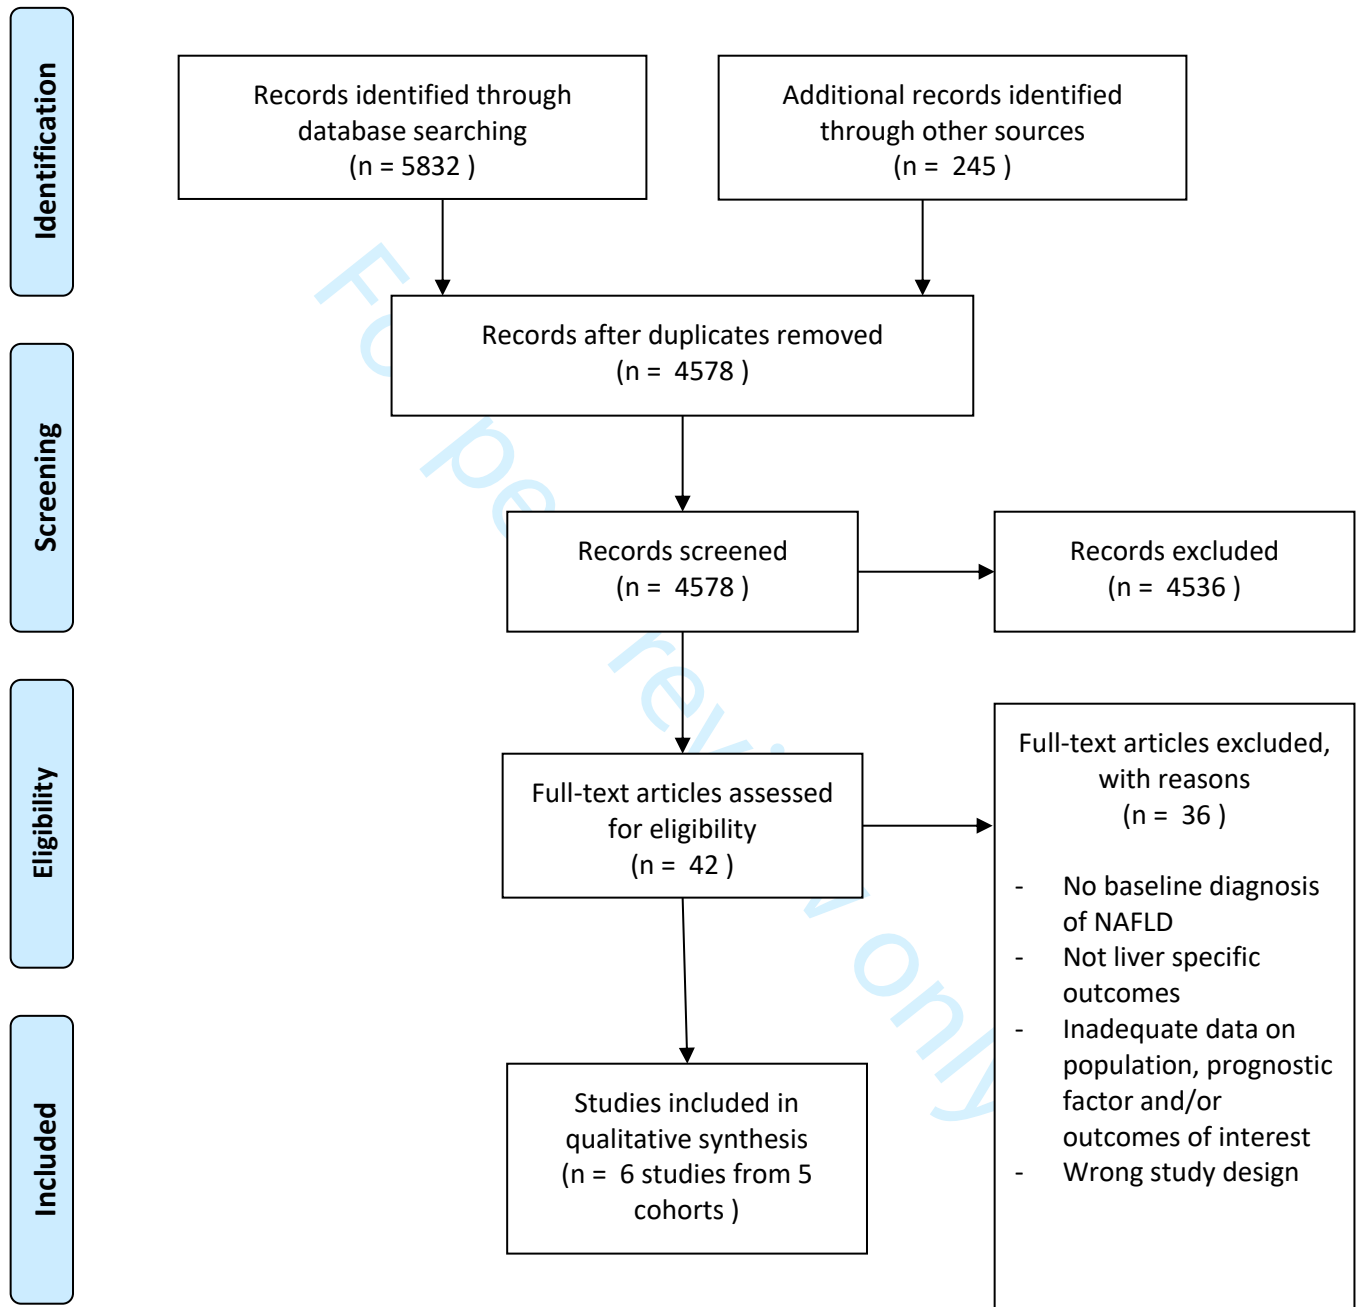

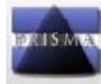

# PRISMA 2009 Checklist

| Section/topic             | #  | Checklist item                                                                                                                                                                                                                                                                                              | Reported on page #               |
|---------------------------|----|-------------------------------------------------------------------------------------------------------------------------------------------------------------------------------------------------------------------------------------------------------------------------------------------------------------|----------------------------------|
| <b>TITLE</b>              |    |                                                                                                                                                                                                                                                                                                             |                                  |
| Title                     | 1  | Identify the report as a systematic review, meta-analysis, or both.                                                                                                                                                                                                                                         | Within title                     |
| <b>ABSTRACT</b>           |    |                                                                                                                                                                                                                                                                                                             |                                  |
| Structured summary        | 2  | Provide a structured summary including, as applicable: background; objectives; data sources; study eligibility criteria, participants, and interventions; study appraisal and synthesis methods; results; limitations; conclusions and implications of key findings; systematic review registration number. | Abstract section para 1-4        |
| <b>INTRODUCTION</b>       |    |                                                                                                                                                                                                                                                                                                             |                                  |
| Rationale                 | 3  | Describe the rationale for the review in the context of what is already known.                                                                                                                                                                                                                              | Introduction Para 1-3            |
| Objectives                | 4  | Provide an explicit statement of questions being addressed with reference to participants, interventions, comparisons, outcomes, and study design (PICOS).                                                                                                                                                  | Introduction Para 4              |
| <b>METHODS</b>            |    |                                                                                                                                                                                                                                                                                                             |                                  |
| Protocol and registration | 5  | Indicate if a review protocol exists, if and where it can be accessed (e.g., Web address), and, if available, provide registration information including registration number.                                                                                                                               | Methods Para 1                   |
| Eligibility criteria      | 6  | Specify study characteristics (e.g., PICOS, length of follow-up) and report characteristics (e.g., years considered, language, publication status) used as criteria for eligibility, giving rationale.                                                                                                      | Methods – para 2-3               |
| Information sources       | 7  | Describe all information sources (e.g., databases with dates of coverage, contact with study authors to identify additional studies) in the search and date last searched.                                                                                                                                  | Methods Para 3-4                 |
| Search                    | 8  | Present full electronic search strategy for at least one database, including any limits used, such that it could be repeated.                                                                                                                                                                               | On request                       |
| Study selection           | 9  | State the process for selecting studies (i.e., screening, eligibility, included in systematic review, and, if applicable, included in the meta-analysis).                                                                                                                                                   | Methods Para 2<br>Results: Fig 1 |
| Data collection process   | 10 | Describe method of data extraction from reports (e.g., piloted forms, independently, in duplicate) and any processes for obtaining and confirming data from investigators.                                                                                                                                  | Methods Para 3,4                 |
| Data items                | 11 | List and define all variables for which data were sought (e.g., PICOS, funding sources) and any assumptions and simplifications made.                                                                                                                                                                       | Methods Para 2-3                 |

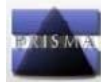

## PRISMA 2009 Checklist

|                                    |    |                                                                                                                                                                                                                        |                  |
|------------------------------------|----|------------------------------------------------------------------------------------------------------------------------------------------------------------------------------------------------------------------------|------------------|
| Risk of bias in individual studies | 12 | Describe methods used for assessing risk of bias of individual studies (including specification of whether this was done at the study or outcome level), and how this information is to be used in any data synthesis. | Methods para 4-5 |
| Summary measures                   | 13 | State the principal summary measures (e.g., risk ratio, difference in means).                                                                                                                                          | N/A              |
| Synthesis of results               | 14 | Describe the methods of handling data and combining results of studies, if done, including measures of consistency (e.g., $I^2$ ) for each meta-analysis.                                                              | N/A              |

Page 1 of 2

| Section/topic                 | #  | Checklist item                                                                                                                                                                                           | Reported on page #           |
|-------------------------------|----|----------------------------------------------------------------------------------------------------------------------------------------------------------------------------------------------------------|------------------------------|
| Risk of bias across studies   | 15 | Specify any assessment of risk of bias that may affect the cumulative evidence (e.g., publication bias, selective reporting within studies).                                                             | N/A                          |
| Additional analyses           | 16 | Describe methods of additional analyses (e.g., sensitivity or subgroup analyses, meta-regression), if done, indicating which were pre-specified.                                                         | N/A                          |
| <b>RESULTS</b>                |    |                                                                                                                                                                                                          |                              |
| Study selection               | 17 | Give numbers of studies screened, assessed for eligibility, and included in the review, with reasons for exclusions at each stage, ideally with a flow diagram.                                          | Results Fig 1                |
| Study characteristics         | 18 | For each study, present characteristics for which data were extracted (e.g., study size, PICOS, follow-up period) and provide the citations.                                                             | Results Table 1              |
| Risk of bias within studies   | 19 | Present data on risk of bias of each study and, if available, any outcome level assessment (see item 12).                                                                                                | Results Table 1              |
| Results of individual studies | 20 | For all outcomes considered (benefits or harms), present, for each study: (a) simple summary data for each intervention group (b) effect estimates and confidence intervals, ideally with a forest plot. | a) Table 1<br>b) N/A         |
| Synthesis of results          | 21 | Present results of each meta-analysis done, including confidence intervals and measures of consistency.                                                                                                  | N/A                          |
| Risk of bias across studies   | 22 | Present results of any assessment of risk of bias across studies (see Item 15).                                                                                                                          | N/A                          |
| Additional analysis           | 23 | Give results of additional analyses, if done (e.g., sensitivity or subgroup analyses, meta-regression [see Item 16]).                                                                                    | N/A                          |
| <b>DISCUSSION</b>             |    |                                                                                                                                                                                                          |                              |
| Summary of evidence           | 24 | Summarize the main findings including the strength of evidence for each main outcome; consider their relevance to key groups (e.g., healthcare providers, users, and policy makers).                     | Discussion Para 1-3          |
| Limitations                   | 25 | Discuss limitations at study and outcome level (e.g., risk of bias), and at review-level (e.g., incomplete retrieval of identified research, reporting bias).                                            | Discussion para 5-6          |
| Conclusions                   | 26 | Provide a general interpretation of the results in the context of other evidence, and implications for future research.                                                                                  | Discussion para 2,3,4<br>7,8 |

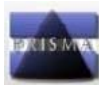

# PRISMA 2009 Checklist

## FUNDING

|         |    |                                                                                                                                            |            |
|---------|----|--------------------------------------------------------------------------------------------------------------------------------------------|------------|
| Funding | 27 | Describe sources of funding for the systematic review and other support (e.g., supply of data); role of funders for the systematic review. | Title page |
|---------|----|--------------------------------------------------------------------------------------------------------------------------------------------|------------|

From: Moher D, Liberati A, Tetzlaff J, Altman DG, The PRISMA Group (2009). Preferred Reporting Items for Systematic Reviews and Meta-Analyses: The PRISMA Statement. PLoS Med 6(7): e1000097. doi:10.1371/journal.pmed1000097

For more information, visit: [www.prisma-statement.org](http://www.prisma-statement.org).

For peer review only

# BMJ Open

## Does moderate alcohol consumption accelerate the progression of liver disease in NAFLD? A systematic review and narrative synthesis

|                                 |                                                                                                                                                                                                                                                                                                                                                                                                                                                                                          |
|---------------------------------|------------------------------------------------------------------------------------------------------------------------------------------------------------------------------------------------------------------------------------------------------------------------------------------------------------------------------------------------------------------------------------------------------------------------------------------------------------------------------------------|
| Journal:                        | <i>BMJ Open</i>                                                                                                                                                                                                                                                                                                                                                                                                                                                                          |
| Manuscript ID                   | bmjopen-2021-049767.R2                                                                                                                                                                                                                                                                                                                                                                                                                                                                   |
| Article Type:                   | Original research                                                                                                                                                                                                                                                                                                                                                                                                                                                                        |
| Date Submitted by the Author:   | 18-Nov-2021                                                                                                                                                                                                                                                                                                                                                                                                                                                                              |
| Complete List of Authors:       | Jarvis, Helen; Newcastle University, Population Health Sciences Institute<br>O'Keefe, Hannah; Newcastle University, Population Health Sciences Institute<br>Craig, Dawn; Newcastle University, Population Health Sciences Institute<br>Stow, Daniel; Newcastle University, Population Health Sciences Institute<br>Hanratty, Barbara; Newcastle University, Population Health Sciences Institute<br>Anstee, Quentin; Newcastle University, Translational and Clinical Research Institute |
| <b>Primary Subject Heading</b>: | Gastroenterology and hepatology                                                                                                                                                                                                                                                                                                                                                                                                                                                          |
| Secondary Subject Heading:      | Epidemiology, General practice / Family practice                                                                                                                                                                                                                                                                                                                                                                                                                                         |
| Keywords:                       | Hepatology < INTERNAL MEDICINE, GENERAL MEDICINE (see Internal Medicine), PRIMARY CARE                                                                                                                                                                                                                                                                                                                                                                                                   |
|                                 |                                                                                                                                                                                                                                                                                                                                                                                                                                                                                          |

SCHOLARONE™  
Manuscripts



I, the Submitting Author has the right to grant and does grant on behalf of all authors of the Work (as defined in the below author licence), an exclusive licence and/or a non-exclusive licence for contributions from authors who are: i) UK Crown employees; ii) where BMJ has agreed a CC-BY licence shall apply, and/or iii) in accordance with the terms applicable for US Federal Government officers or employees acting as part of their official duties; on a worldwide, perpetual, irrevocable, royalty-free basis to BMJ Publishing Group Ltd ("BMJ") its licensees and where the relevant Journal is co-owned by BMJ to the co-owners of the Journal, to publish the Work in this journal and any other BMJ products and to exploit all rights, as set out in our [licence](#).

The Submitting Author accepts and understands that any supply made under these terms is made by BMJ to the Submitting Author unless you are acting as an employee on behalf of your employer or a postgraduate student of an affiliated institution which is paying any applicable article publishing charge ("APC") for Open Access articles. Where the Submitting Author wishes to make the Work available on an Open Access basis (and intends to pay the relevant APC), the terms of reuse of such Open Access shall be governed by a Creative Commons licence – details of these licences and which [Creative Commons](#) licence will apply to this Work are set out in our licence referred to above.

Other than as permitted in any relevant BMJ Author's Self Archiving Policies, I confirm this Work has not been accepted for publication elsewhere, is not being considered for publication elsewhere and does not duplicate material already published. I confirm all authors consent to publication of this Work and authorise the granting of this licence.



1  
2  
3 **Does moderate alcohol consumption accelerate the progression of liver disease**  
4 **in NAFLD? A systematic review and narrative synthesis**  
5  
6  
7  
8

9 Helen Jarvis<sup>1</sup> (0000-0001-5039-0228) , Hannah O'Keefe<sup>1</sup> (0000-0002-0107-711X), Dawn Craig<sup>1</sup>,  
10 Daniel Stow<sup>1</sup>, \*Barbara Hanratty<sup>1</sup>, \*Quentin M Anstee<sup>2</sup>  
11  
12  
13

- 14 1. Population Health Sciences Institute, Faculty of Medical Sciences, Newcastle  
15 University, Newcastle upon Tyne, UK, NE2 4HH  
16  
17

18  
19 Helen Jarvis [helen.jarvis2@ncl.ac.uk](mailto:helen.jarvis2@ncl.ac.uk)

20 NIHR Doctoral Research Fellow

21 Hannah O'Keefe [hannah.o'keefe@newcastle.ac.uk](mailto:hannah.o'keefe@newcastle.ac.uk)

22 Training Fellow in Evidence Synthesis

23 Dawn Craig ([dawn.craig@newcastle.ac.uk](mailto:dawn.craig@newcastle.ac.uk))

24 Professor of Practice in Evidence Synthesis

25 Daniel Stow ([daniel.stow@newcastle.ac.uk](mailto:daniel.stow@newcastle.ac.uk))

26 Research Associate

27 Barbara Hanratty ([barbara.hanratty@newcastle.ac.uk](mailto:barbara.hanratty@newcastle.ac.uk))

28 Professor of Primary Care and Public Health  
29  
30  
31  
32  
33  
34  
35  
36  
37

- 38 2. Translational and Clinical Research institute, Faculty of Medical Sciences, Newcastle  
39 University, Newcastle upon Tyne, UK, NE2 4HH  
40  
41

42 Quentin M Anstee ([quentin.anstee@newcastle.ac.uk](mailto:quentin.anstee@newcastle.ac.uk))

43 Professor of Experimental Hepatology  
44  
45  
46

47 \* Joint last authorship BH and QMA  
48  
49  
50  
51

- 52 1. Correspondence to: Helen Jarvis, GP and NIHR DRF, Population Health Sciences  
53 Institute, Faculty of Medical Sciences, Newcastle University, Newcastle upon Tyne, UK,  
54 NE2 4HH. Email: [helen.jarvis2@ncl.ac.uk](mailto:helen.jarvis2@ncl.ac.uk)  
55  
56  
57  
58  
59  
60

**Structured abstract:****Objectives:**

Liver disease is a leading cause of premature death, partly driven by the increasing incidence of Non-alcohol related fatty liver disease (NAFLD). Many people with a diagnosis of NAFLD drink moderate amounts of alcohol. There is limited guidance for clinicians looking to advise these patients on the effect this will have on their liver disease progression. This review synthesises the evidence on moderate alcohol consumption and its potential to predict liver disease progression in people with diagnosed NAFLD.

**Methods:**

A systematic review of longitudinal observational cohort studies was conducted. Databases (MEDLINE, EMBASE, The Cochrane Library and ClinicalTrials.gov) were searched up to September 2020. Studies were included that reported progression of liver disease in adults with NAFLD, looking at moderate levels of alcohol consumption as the exposure of interest. Risk of bias was assessed using the QUIPS tool.

**Results:**

Of 4578 unique citations, 6 met the inclusion criteria. Pooling of data was not possible due to heterogeneity and studies were analysed using narrative synthesis. Evidence suggested that any level of alcohol consumption is associated with worsening of liver outcomes in NAFLD, even for drinking within recommended limits. Well conducted population based studies estimated up to a doubling of incident liver disease outcomes in NAFLD patients drinking at moderate levels.

**Conclusions:**

This review found that any level of alcohol intake in NAFLD may be harmful to liver health. Study heterogeneity in definitions of alcohol exposure as well as in outcomes limited quantitative pooling of results. Use of standardised definitions for exposure and outcomes would support future meta-analysis.

Based on this synthesis of the most up to date longitudinal evidence, clinicians seeing patients with NAFLD should currently advise abstinence from alcohol.

**Funding and registration:**

1  
2  
3 This study was funded by an NIHR DRF (NIHR300716). The protocol was registered with  
4 PROSPERO (#CRD42020168022).  
5  
6  
7  
8  
9

### Strengths and limitations of this study:

- This is a timely synthesis of the best available evidence on the role of moderate alcohol consumption in NAFLD
- We used systematic searches to identify literature and prospectively registered our protocol on PROSPERO
- We restricted our inclusion criteria to studies that used longitudinal data to provide evidence of temporal associations
- Due to heterogeneity in definitions of alcohol exposure and outcomes, it was not possible to carry out a meta-analysis
- The existing literature base is limited and only six studies were sufficiently robust to meet our pre-defined inclusion criteria

### Main Text:

#### Introduction:

Liver disease is an increasing health burden across the world, and it is now a major cause of premature (<65 yrs) mortality (1,2). As premature mortality rates from many non-communicable diseases have fallen over the last 30 years, the burden of liver disease is increasing (2,3). The commonest causes of chronic liver disease in high income countries are alcohol related liver disease (ARLD) and metabolic-syndrome related liver disease (or non-alcohol related fatty liver disease - NAFLD). Chronic liver disease is often diagnosed as a result of abnormal liver blood tests or liver imaging, with a fatty liver (steatosis) progressing in some through inflammation (steatohepatitis) and stiffening (fibrosis) to scarring (cirrhosis) increasing the risk of decompensated liver disease or liver cancer. This process of progressive damage to the liver is common to both aetiologies.

Whilst the labelling of liver disease suggests a dichotomy, the clinical reality is that there is significant overlap between ARLD and NAFLD (4). The incidence of obesity and diabetes is rising, and a substantial proportion of the population is drinking alcohol at above recommended

limits (5). It is estimated that up to 17% of the adult population may meet criteria for both NAFLD and ARLD (6). Despite this, there is little guidance available for generalist healthcare professionals, on how to advise people with a diagnosis of NAFLD on safer alcohol consumption.

Recommendations on safe alcohol consumption levels vary worldwide. Increasingly, they take into account the effect that alcohol has on the risk of developing many adverse health outcomes, including cancer. International analysis suggests this should be as low as total abstinence to minimize all health risks (7). Recommended limits for safe alcohol consumption in the UK general population are up to 14 units of alcohol per week in both males and females (8), which equates to 16 grams of alcohol per day at 8g/unit. Moderate alcohol consumption is generally defined in the literature as drinking within, or slightly in excess of, these limits versus complete abstinence (4). There is a significant gap between this recommended 'moderate' limit and the levels of alcohol consumption that would prompt an assessment for alcohol-related liver damage. The UK National Institute of Health and Care Excellence (NICE) recommends offering a liver cirrhosis test to men drinking over 50 units and women drinking over 35 units a week on an ongoing basis over several months (9), leaving a significant proportion who are drinking at and above 14 units a week, but below the levels to have liver assessment based on their alcohol consumption alone. The international differences in definition of how many grams of alcohol a 'unit' contains can create confusion and the reader is directed to table 1 to help in interpreting the study results in the context of UK Government and NICE recommended limits.

Table 1: International definitions of moderate alcohol consumption, UK recommended limits and levels that would warrant assessment for ARLD, all expressed in grams of alcohol and UK units.

| Definitions:                                                     | grams of alcohol |          | UK Units of alcohol |            |
|------------------------------------------------------------------|------------------|----------|---------------------|------------|
|                                                                  | Daily*           | Weekly*  | Daily*              | Weekly*    |
| Accepted International consensus of moderate alcohol consumption | F: <20           | F: <140  | F: < 2.5            | F: <17.5   |
|                                                                  | M: <30           | M: <210  | M: < 3.75           | M: < 26.25 |
| UK recommended safe weekly limits                                | </= 16           | </= 112  | </= 2               | </= 14     |
| NICE thresholds for assessing for liver                          | F: > 40          | F :> 280 | F: > 5              | F: > 35    |

|           |        |         |          |         |
|-----------|--------|---------|----------|---------|
| cirrhosis | M:> 57 | M: >400 | M: > 7.1 | M: > 50 |
|-----------|--------|---------|----------|---------|

\* Daily and weekly figures are given for comparison only. The bold numbering for each definition is the standard format in which this definition is expressed

There is still uncertainty, and an absence of guidance, on safe levels of alcohol consumption for people with established NAFLD. Indeed, it is not clear that any level of alcohol consumption is safe to minimise progression of the liver disease in this population. It is known that people with very high levels of alcohol consumption (who would meet criteria for a diagnosis of ARLD), and who also have metabolic risk factors, are at even greater risk of adverse liver outcomes (10,11). But there is also some evidence that for people with metabolic risk factors (but who do not have a NAFLD diagnosis), drinking alcohol at low levels may protect against cardiovascular disease, prevent fatty liver disease, and lead to better outcomes than with complete abstinence (12,13). Elucidating the role of alcohol in NAFLD progression is a small part of understanding the interplay of genetic and environmental factors and their effects on the liver; an area of ongoing research and debate (14).

The purpose of this systematic review is to synthesise evidence on the role of moderate alcohol consumption on progression to severe liver disease in people with diagnosed NAFLD. This will help guide the advice given to NAFLD populations around safe alcohol consumption in primary care and specialist settings.

## Methods:

The protocol for this review was registered in advance with PROSPERO (International Prospective Register of Systematic Reviews, #CRD42020168022).

### *Types of studies, inclusion and exclusion criteria*

Primary studies were included if they were prospective or retrospective cohort studies. The population of interest was adult patients (>18 years old) with diagnosed NAFLD. The outcome of interest was progression of liver disease in this population. The exposure of interest was no

1  
2  
3 vs moderate alcohol consumption. For our inclusion criteria we defined 'moderate consumption'  
4 as up to 35 units per week in females, and 50 units per week in males (levels that would be  
5 considered the threshold for definite risk of ARLD according to NICE guidelines (9)). This  
6 definition included studies that focused on the effects of alcohol within or just above current  
7 weekly recommended limits (the usual definition of 'moderate' alcohol consumption), as well as  
8 those who looked beyond these levels of consumption, up to the NICE ARLD levels.  
9  
10  
11  
12  
13

14 Exclusion criteria were as follows: 1) studies where the population had diagnosed ARLD; 2)  
15 studies where the population was defined according to their alcohol consumption levels rather  
16 than their NAFLD status at baseline; 3) studies where patients already had severe liver disease  
17 at the time of cohort entry; 4) cross sectional studies or studies where exposure was only  
18 measured at the same time as outcome.  
19  
20  
21  
22  
23

24 We performed a systematic review following the Preferred Reporting Items for Systematic  
25 Reviews and Meta-Analyses (PRISMA) guidelines (15).  
26  
27

### 28 *Search strategy and data extraction*

29  
30

31 Potentially relevant studies were identified through systematic literature searches of relevant  
32 databases (MEDLINE, EMBASE, The Cochrane Library and ClinicalTrials.gov, CPCI-S  
33 (Conference Proceedings Citation Index – Science, Web of Knowledge), CINAHL(EBSCO)) in  
34 January 2020 and updated in September 2020. No language restrictions were applied, and  
35 databases searched documents published from 1990 onwards. Reference lists from potentially  
36 relevant papers and previous review articles were hand searched. MeSH (Medical Subject  
37 Headings) and free text terms for the NAFLD population, alcohol exposures and liver outcomes  
38 of interest were used. Two researchers (HJ and either HO or DS) independently screened titles  
39 and abstracts. Any disagreement in full text selection was resolved by consensus. Record  
40 screening was also assisted by Rayyan, an online software tool that assesses similarities  
41 between selected records and highlights other potentially relevant studies based on the  
42 screener's previous selection (16). Full texts of potentially relevant papers were obtained and  
43 read by two independent researchers with reference to the predefined set of criteria to identify  
44 final study inclusion. Data were extracted into a standardised form, piloted on 3 studies before  
45 full extraction. Data extraction was based on the updated checklist for critical appraisal and data  
46 extraction for systematic reviews of prediction studies (CHARMS-PF) checklist for prognostic  
47  
48  
49  
50  
51  
52  
53  
54  
55  
56  
57  
58  
59  
60

1  
2  
3 studies (17), undertaken by one researcher and checked by a second. Two authors (HJ, HO)  
4 assessed the risk of bias independently. Since the included studies were observational cohort  
5 studies of prognostic factors, the QUIPS (Quality in Prognostic factor Studies) tool was used  
6 (18).  
7  
8  
9

### 10 11 *Data synthesis*

12  
13  
14 Pooling of data was not possible due to exposure and outcome heterogeneity across studies. A  
15 narrative synthesis (19) was undertaken, with data synthesised by alcohol exposure level. Due  
16 to the small number of studies, even those with high risk of bias are included in the synthesis,  
17 although this bias assessment is made clear throughout the narrative.  
18  
19  
20

### 21 22 *Patient and Public Involvement*

23  
24  
25 Patients and the Public were not involved in the design or conduct of this review but will be  
26 involved in the dissemination of findings through a funded PPI steering group and close  
27 collaboration with the British Liver Trust.  
28  
29  
30

### 31 32 33 34 **Results:**

35  
36  
37  
38 The searches identified 4578 unique citations. Of the titles and abstracts screened, 42 articles  
39 were selected for full-text screening. Thirty six were excluded at this stage for reasons  
40 summarised in the PRISMA diagram (Figure 1). In seven of the excluded studies the population  
41 did not have a baseline diagnosis of NAFLD (20,21,22,23,24,25,26) and in five studies the  
42 population already had advanced liver disease at baseline (27,28,29,30,31). Five of the  
43 excluded studies focused on non liver specific outcomes such as overall mortality  
44 (32,33,34,35,36), while eleven were conference abstracts or short papers which held  
45 inadequate data on either population, exposure or outcomes  
46 (20,21,23,25,29,32,33,37,38,39,40). The commonest reason for exclusion at full text stage was  
47 study design, mainly cross sectional studies looking at a single time point to assess exposure  
48 and outcome (24,30,31,37,38,39,41,42,43,44,45,46,47). There were also eight studies which on  
49 full text reading were review articles or editorials (48,49,50,51,52,53,54,55). A total of six  
50  
51  
52  
53  
54  
55  
56  
57  
58  
59  
60

1  
2  
3 unique studies representing data from five cohorts were eligible for inclusion in the systematic  
4 review, and were assessed for quality (Figure 1), (56-61).  
5  
6  
7

8 *Characteristics of included studies*  
9

10  
11 *Further details of included studies are shown in Table 2.*  
12  
13  
14  
15  
16  
17  
18  
19  
20  
21  
22  
23  
24  
25  
26  
27  
28  
29  
30  
31  
32  
33  
34  
35  
36  
37  
38  
39  
40  
41  
42  
43  
44  
45  
46  
47  
48  
49  
50  
51  
52  
53  
54  
55  
56  
57  
58  
59  
60



Table 2: Characteristics of included studies

| Author /year     | Country                                    | Study design and population                                                                                 | Yrs f/u | Method of NAFLD diag* | Method of measuring alcohol consumption                           | Definition of moderate consumption studied as RF                      | Study outcomes of interest and event no                         | Adjustments of interest considered                          | Adjusted HRs/OR/ mean differences for liver events with 95% CI and p-values                                                                                            | Risk of bias |
|------------------|--------------------------------------------|-------------------------------------------------------------------------------------------------------------|---------|-----------------------|-------------------------------------------------------------------|-----------------------------------------------------------------------|-----------------------------------------------------------------|-------------------------------------------------------------|------------------------------------------------------------------------------------------------------------------------------------------------------------------------|--------------|
| Aberg 2019 (56)  | Finland                                    | retrospective data linkage cohort analysis NAFLD population 6462, mean age 53 yrs, 60% M                    | 10.9    | FLI >30               | Questionnaire at cohort entry                                     | < 50g/day in 10 g categories with abstinence as reference             | composite non-fatal and fatal liver disease 58 events           | ? unclear other than age, sex                               | per increase in 10g of alcohol per day v abstinence HR 1.43 (1.12 - 1.82) p=0.004                                                                                      | high         |
| Aberg 2020 (57)  | Finland (FINRISK Health survey)            | retrospective data linkage cohort analysis NAFLD population 8345, mean age 53.7 yrs, 60% M                  | 11.1    | FLI >60               | Questionnaire at cohort entry (recall for past month)             | < 50g/day in 10 g categories with abstinence as reference             | composite non-fatal and fatal liver disease 152 events          | age, sex, smoking, T2DM                                     | g alcohol/day v abstinence<br>0-9 HR 1.38 (0.74-2.58)<br>10-19 HR 2.18(1.04-4.53)<br>20-29 HR 3.62(1.67-7.76)<br>30-39 HR 3.53(1.53-8.14)<br>40-49 HR8.79(3.95-19.56)  | low          |
| Ajmera 2018 (58) | USA                                        | retrospective analysis of longitudinal cohorts within NASH CRN NAFLD population 285, mean age 47 yrs, 30% M | 3.9     | liver biopsy          | Questionnaire at cohort entry (Skinner lifetime drinking history) | <2 drinks per day and excluded if >6 drinks on 1 occasion >/= monthly | histological resolution or progression on follow up biopsy      | age, sex, race, smoking                                     | persistent moderate drinkers v abstinence**<br><b>resolution</b> of NASH: OR 0.32 (0.11-0.92) p =0.04<br>fibrosis progression: adj mean diff 0.00 (-0.29-0.29) p =0.99 | mod          |
| Chang 2019 (59)  | South Korea (Kangbuk Samsung Health Study) | prospective population cohort NAFLD population 58927, mean age 37.7, 82% M                                  | 4.9     | US                    | Questionnaire at each study visit (annual or biennial)            | 10 - 19.9 g/day (F)<br>10 - 29.9 g/day (M)<br>(low 1-9.9g/day)        | fibrosis progress as estimated by high indirect serum scores*** | age, sex, BMI, smoking, exercise level, education, T2DM, BP | mod v abstinence\$ (repeat observations)<br>Fib4: HR 1.33(1.13-1.57)<br>NFS: HR 1.37(1.23-1.52)<br>low v abstinence (repeat observations)<br>Fib 4: HR 1.08(0.91-1.27) | low          |

1  
2  
3  
4  
5  
6  
7  
8  
9  
10  
11  
12  
13  
14  
15  
16  
17  
18  
19  
20  
21  
22  
23  
24  
25  
26  
27  
28  
29  
30  
31  
32  
33  
34  
35  
36  
37  
38  
39  
40  
41  
42  
43  
44  
45  
46  
47

|                    |        |                                                                                                                      |      |                     |                                                  |                                                |                                       |                                           |                                                                                                                                    |     |
|--------------------|--------|----------------------------------------------------------------------------------------------------------------------|------|---------------------|--------------------------------------------------|------------------------------------------------|---------------------------------------|-------------------------------------------|------------------------------------------------------------------------------------------------------------------------------------|-----|
|                    |        |                                                                                                                      |      |                     |                                                  |                                                |                                       |                                           | NFS: HR 1.14(1.02-1.27)                                                                                                            |     |
| Ekstedt 2009 (60)  | Sweden | retrospective cohort NAFLD population 71, mean age 47.3, 72% M                                                       | 13.8 | US and liver biopsy | Questionnaire AUDIT-C and interview at follow up | g/day - no upper limit defined as 'moderate'   | fibrosis progress on follow up biopsy | age, sex, BMI, T2DM, fibrosis at baseline | increasing alcohol g/week v abstinence OR 1.012 (1.000-1.025) p = 0.055                                                            | low |
| Kawamura 2016 (61) | Japan  | prospective cohort NAFLD population 9959, mean age 49, 87% M (included 18 patients >70g alcohol/day defined as ARLD) | 5.4  | US                  | Questionnaire at baseline and every 6 months     | g/day in categories with <20g/day as reference | HCC on imaging                        | age, sex, BMI, T2DM, serum markers        | g/day alcohol v <20g/day 20-39 HR 0.90(0.11-7.90) p=0.919<br>≥40-69 HR 2.48(1.01-6.05) p=0.047<br>>70 HR 12.61(5.68-28.00) p=0.001 | low |

Abbreviations: NAFLD = non-alcohol related fatty liver disease; NASH = non-alcohol related steatohepatitis; ARLD = alcohol related liver disease; RF= risk factor; CRN= clinical research network; Yrs = years; M = Male; FLI = Fatty Liver Index; US = hepatic ultrasound; g = grams; HCC = hepatocellular carcinoma; BMI = body mass index; T2DM = type 2 diabetes mellitus; BP = blood pressure; HR = Hazard ratio; OR = Odds ratio; CI = confidence interval; NFS = NAFLD fibrosis score.

\*\*Note multiple differences in means and OR presented for different histological and biochemical outcomes between abstainers, persistent moderate drinkers, and changes in alcohol consumption between biopsies. Presented data represent histological outcomes of potential clinical prognostic significance within the remit of this review comparing persistent moderate drinking to abstinence

\*\*\* Scores used to estimate fibrosis progression were the Fib4 score, NAFLD fibrosis score (NFS) and APRI score \$ multiple HR presented in paper for different score outcomes for single and repeated outcome measures looking at intermediate/high- or high-risk scores in low and moderate drinkers and different subgroups. Presented data represent outcomes best in keeping with remit of this review using widely used indirect serum markers of liver fibrosis.

1  
2  
3  
4 Within the studies meeting inclusion criteria, three (58,59,60) looked at the exposure of alcohol  
5 consumption up to, or similar to, the accepted international definition of 'moderate consumption'.  
6 This is <20g/day in women and <30g/day in men (26). Three of the studies (56,57,61) looked at  
7 low alcohol consumption but also extended 'moderate consumption' up to levels of alcohol  
8 consumption which would be considered more consistent with ARLD.  
9  
10  
11  
12  
13  
14  
15

### 16 ***Moderate alcohol consumption (accepted international definitions) and risk of liver*** 17 ***disease progression in NAFLD*** 18 19 20

21 Three studies examined the effects of alcohol in NAFLD using definitions in keeping with the  
22 accepted international definition of 'moderate consumption' (58,59,60). Although these studies  
23 shared a similar aim, they varied in NAFLD population definition, measurement of alcohol  
24 consumption and choice of liver outcomes. Two looked at histological progression outcomes  
25 and one used non-invasive indirect blood-based markers of liver fibrosis. Two of the studies  
26 were rated as having a low risk of bias (59,60) and one was rated as having a moderate risk  
27 (58).  
28  
29  
30  
31  
32  
33

34 Ajmera et al (58) studied a NAFLD population taken retrospectively from the NASH clinical  
35 research network, including populations from an observational study and the placebo arm of two  
36 NASH drug trials, all of whom had biopsy proven NAFLD (285 participants). Alcohol  
37 consumption was measured at cohort entry and at varying time points up to, and including,  
38 follow-up liver biopsy, which occurred, on average, 3.9 years later. Multiple histological markers  
39 of disease progression and resolution were studied, and the authors looked at the association  
40 between baseline drinking status and disease, as well as change in drinking status over time  
41 and disease progression/resolution. For most of the histological end points studied, there was  
42 no significant difference between moderate drinkers and abstainers in outcomes, with the only  
43 significant results suggesting that abstainers had less progressive or a higher likelihood of  
44 resolution of their disease between biopsies, particularly the persistent abstainers when  
45 compared to the persistent moderate drinkers. Results should be interpreted in the knowledge  
46 that a large number of related histological outcomes were reported, increasing the likelihood of  
47 a statistically significant result by chance. The study also had a relatively short follow up period  
48  
49  
50  
51  
52  
53  
54  
55  
56  
57  
58  
59  
60

1  
2  
3 between biopsies. The absence of detailed information on which other prognostic factors were  
4 taken into account, led to a rating of moderate on risk of bias assessment.  
5  
6

7  
8 A similar study by Ekstedt et al (60) looked at a smaller group (71 participants) of biopsy proven  
9 NAFLD, with follow up histology an average of 13.8 years after initial biopsy. Alcohol  
10 consumption was assessed at baseline and follow up, with heavy episodic drinking assessed in  
11 addition to weekly consumption. Primary outcome was significant fibrosis progression, defined  
12 as progression by one or more fibrosis stage or the development of end stage liver disease  
13 during follow up. Although higher weekly alcohol consumption showed some tendency to predict  
14 fibrosis progression (OR for increase in grams of alcohol per week 1.012 (1.000 - 1.025)) only  
15 the presence of heavy episodic drinking (defined as >60g/day in men and >48g/day in women  
16 more than once a month) reached statistical significance in predicting fibrosis progression.  
17  
18  
19  
20  
21  
22

23  
24 Of note in both the Ajmera and Ekstedt studies were the very low levels of alcohol consumption  
25 in the 'moderate drinkers', with the majority (78%) of the moderate drinkers drinking less than  
26 monthly in the Ajmera study and the average weekly alcohol consumption in the Ekstedt study  
27 being only 39 g/week. Both studies also included a significant number of patients who already  
28 had liver inflammation (NASH) at baseline (over 50% in both studies), indicating a higher  
29 proportion of patients with a tendency to progressive disease as compared to a general NAFLD  
30 population, as would be expected with biopsy-based studies.  
31  
32  
33  
34  
35

36  
37 In contrast to the relatively selective biopsy studies, Chang et al (59) studied a large prospective  
38 population cohort (Kangbuk Samsung Health Study) of whom 58,927 had ultrasound evidence  
39 of fatty liver but without evidence of other liver diagnoses or advanced disease. Alcohol  
40 exposure was weekly units at baseline and follow up was for a median of 8.3 years with  
41 outcome of interest being progression to advanced liver fibrosis using non-invasive blood-based  
42 markers of disease. For moderate drinkers (10 - 30 g/day), the risk of progressing to advanced  
43 fibrosis (using intermediate/high Fib4 score as the outcome) was HR 1.33 (1.13 - 1.57), when  
44 compared to abstainers. Light drinkers (1-10 g/day) showed a tendency towards more advanced  
45 disease when compared to abstainers, but this did not reach statistical significance (HR 1.08 CI  
46 0.91-1.27).  
47  
48  
49  
50  
51  
52

53  
54 ***Moderate alcohol consumption (below the threshold that would be consistent with ARLD)***  
55 ***and risk of liver disease progression in NAFLD***  
56  
57  
58  
59

1  
2  
3  
4  
5 Three studies extended the definition of moderate alcohol consumption beyond the international  
6 consensus definition of 'moderate consumption'. Two of the studies were rated as having a low  
7 risk of bias (57,61), with one rated as high risk of bias (56).  
8  
9

10  
11 The general population longitudinal data presented by Chang et al (59) is supplemented by two  
12 recent related studies by Aberg et al (56,57), using data from the same Finnish National Health  
13 Surveys (FINRISK, Health 2000) cohort. The definition of moderate alcohol consumption was  
14 increased to include anything up to 50 grams per day in these studies. Although the exposures  
15 and outcome measures were the same in the two related studies, the NAFLD population was  
16 defined using different fatty liver index (FLI) cut offs values, generating overlapping but distinct  
17 study populations. For this reason, data are presented from both studies.  
18  
19

20  
21 The first study, only available as a conference abstract, (56) used a FLI>30 to retrospectively  
22 define their NAFLD population. This low FLI would generally be used as a 'rule out' rather than  
23 'rule in' cutoff for NAFLD diagnosis (62) and the limited data presented suggests that using  
24 abstinence as a reference, any increase in alcohol consumption by 10 g/day, increased incident  
25 liver events (combined fatal and non-fatal outcomes) by 43% with a presented HR of 1.43 (1.12  
26 - 1.82) for each 10 g rise in daily alcohol consumption. The data presented contained few details  
27 of adjustment factors or analysis plan. This study was graded as having a high risk of bias, and  
28 these results should be interpreted with caution.  
29  
30  
31  
32  
33  
34  
35

36  
37 A larger study (57), based on the same cohort, retrospectively identified a NAFLD population  
38 based on a FLI of >60 (the accepted and validated cut off for making a positive diagnosis of  
39 NAFLD in the literature (63)). Alcohol intake at cohort entry was based on estimated  
40 consumption over the previous year. Lifetime abstainers were used as the reference group.  
41 Fatal and non-fatal liver outcomes were studied in 8345 participants over 92 350 person years  
42 of follow up. The study concluded that incident liver disease is higher at all levels of alcohol  
43 consumption, compared to lifetime abstainers with steadily rising hazard ratios as the level of  
44 alcohol consumption increases. Although drinking up to 10g per day was not statistically  
45 significantly different to abstaining (HR 1.38 CI 0.74 -2.58 in the final model), levels of alcohol  
46 consumption between 10 g and 19 g, which are roughly equivalent to the 14 units per week  
47 recommended limits, prognosticated for over double the number of incident liver events in  
48 NAFLD patients (HR 2.18 CI 1.05-4.53). At higher levels, which would not necessarily trigger a  
49 liver assessment for alcohol related harm in current guidelines, risk of significant liver disease  
50  
51  
52  
53  
54  
55  
56  
57  
58  
59  
60

1  
2  
3 was nearly nine times higher (for consumption of 40 - 49 g of alcohol a day, HR 8.79 CI 3.95-  
4 19.56).  
5  
6

7  
8 A retrospective Japanese cohort study (61) also looked at stepwise rises in daily alcohol  
9 consumption as a prognostic factor for the more specific outcome of hepatocellular carcinoma  
10 (HCC) in people with fatty liver (identified on ultrasound). The Kawamura study with 9959  
11 participants followed for a median of nearly 2000 days, had a reference group of people drinking  
12 < 20g of alcohol per day, rather than abstainers. This differed from all the other studies  
13 reviewed. Only those drinking at between 40-69 g of alcohol a day had a statistically significant  
14 increase in rates of HCC (HR 2.48 CI 1.01 - 6.05 p 0.047), with no effect in those drinking at  
15 more moderate levels. The population in this retrospective cohort were patients undergoing  
16 ultrasound at two tertiary hepatology centres in Japan rather than a general population cohort,  
17 and as HCC is known to occur in non-cirrhotic NAFLD (64) comparison with outcomes from  
18 other studies should be interpreted with caution.  
19  
20  
21  
22  
23  
24

25  
26  
27 Excluding the only study rated as having a high risk of bias (56), the other good quality  
28 longitudinal studies of varying design, all reported either no association or a negative impact of  
29 moderate amounts of alcohol on future liver disease outcomes. This was seen across the  
30 studies looking at levels of alcohol consumption within the international definition of moderate  
31 consumption, and those that extended this definition of moderate consumption.  
32  
33  
34  
35

## 36 **Discussion:**

### 37 *Summary of results*

38  
39  
40  
41  
42 In this systematic review of the latest available longitudinal data, we found evidence to suggest  
43 that any amount of alcohol, even at low levels, may be harmful for liver health in people with  
44 diagnosed NAFLD. This evidence comes from both general population-based cohorts using  
45 coded liver outcomes, as well as tertiary centre NAFLD populations defined using histological  
46 end points.  
47  
48  
49  
50

### 51 *Comparison with existing literature*

1  
2  
3 Until recently the majority of evidence in this area has come from cross-sectional studies where  
4 alcohol exposure was assessed at the same time as liver outcomes. These data provide  
5 somewhat contradictory results, with several studies indicating that moderate alcohol  
6 consumption is associated with lower levels of liver disease progression (39,43,65,66) although  
7 more recent studies support of our findings, and suggest the opposite (42,45). The design  
8 employed in these studies does not allow the assessment of temporal relationships and is open  
9 to reverse causality (those with liver damage may be newly abstaining from alcohol for example)  
10 in addition to recall and other biases. On the basis of these limitations, cross-sectional studies  
11 were excluded from this current review, although they have been widely cited in previous critical  
12 reviews in this area, before more recent longitudinal data were available.  
13  
14  
15  
16  
17  
18  
19

20  
21 In the historical absence of large prospective cohort studies and the impossibility of conducting  
22 a controlled trial in the area, comparative work has been undertaken using Mendelian  
23 randomisation. This utilises random genetic variations which affects the rate of alcohol  
24 metabolism as a proxy measure for alcohol exposure, with randomisation of NAFLD patients  
25 based on an allele known to confer lower lifetime alcohol consumption by necessity due to the  
26 unpleasant effects of drinking even low levels of alcohol. Findings from this study were  
27 supportive of our review, with the group with higher lifetime alcohol consumption showing  
28 markers of more severe disease on biopsy, even though alcohol consumption was at very  
29 modest levels (46).  
30  
31  
32  
33  
34  
35

36  
37 In addition to the evidence on the relationship between modest alcohol consumption in NAFLD  
38 and liver outcomes, other published studies have focused on overall mortality and  
39 cardiovascular outcomes. A study of 4264 participants in an ultrasound diagnosed NAFLD  
40 cohort study showed no significant difference in overall mortality in those with alcohol  
41 consumption in the low/moderate range versus abstinence after 20 years of follow up (36). A  
42 subsequent study with the same US cohort reported a protective effect of low alcohol  
43 consumption on overall survival in NAFLD (67). The evidence for a protective effect of low  
44 alcohol consumption on overall survival in NAFLD (67). The evidence for a protective effect of low  
45 alcohol consumption on cardiovascular outcomes in the general population is generally  
46 accepted (68). The evidence for cardiovascular protection in those with NAFLD is more limited,  
47 with some evidence that moderate alcohol may provide some benefit (69) but more recent  
48 studies finding no protective effects (42,70). The comparative evidence on overall mortality and  
49 cardiovascular outcomes highlights the need to assess liver disease risks within these  
50 competing contexts.  
51  
52  
53  
54  
55  
56  
57  
58  
59  
60

### *Strengths and limitations*

Although there have been several recent critical reviews of the role of moderate alcohol consumption in NAFLD, the most recent of which reach similar conclusions (4,49,71), these have been wider in their remit with less well-defined inclusion criteria and less systematic methodology. The predetermined inclusion criteria, robust systematic data collection and reporting techniques (in line with PRISMA guidelines) and decision to avoid cross-sectional data are all important in providing the best available evidence to answer the review question of the temporal relationship between moderate alcohol consumption and liver outcomes in NAFLD. The challenges of synthesising observational data, including unmeasured confounding and heterogeneity, were anticipated, but meant that data pooling was not possible.

A particular limitation hindering comparison between studies were the methods of defining moderate alcohol consumption. The consensus for defining a level of alcohol consumption above which a diagnosis of pure NAFLD cannot be made have been supported by the European Association for the Study of the Liver (EASL) and the American Association for the Study of the Liver Diseases (AASLD) and set at 20g/day in women and 30g/day in men (62,72), yet most of the published studies do not use these cut-offs in their data. Until this is standardised across studies, with an additional consensus defining levels above this 'moderate' but not high enough to reach levels associated with a definite diagnosis of ARLD, synthesising the evidence in this area will remain challenging.

### *Implications for research/practice*

This review adds weight to individual studies showing that any level of alcohol intake in NAFLD may be harmful to liver health. Further prospective cohort studies are needed, with detailed definitions/measures of alcohol exposure, and validated clinical liver outcomes, measured at appropriate times. Future research should focus on looking at outcomes in relation to accepted alcohol intake levels used in definitions of NAFLD. It should also take into account that the clinical reality is a dual-aetiology patient who may currently be excluded from both diagnostic categories based on their alcohol intake being too high for NAFLD, and too low for ARLD definitions. This is an ever-expanding patient group seen in many clinical settings.



1  
2  
3 Based on a synthesis of the evidence presented in this review, clinicians seeing patients with  
4 NAFLD in primary or secondary care should currently advise abstinence from alcohol to avoid  
5 accelerating liver harm. This is likely to be difficult for patients to accept, and public health  
6 messaging will need careful thought if it is to have any impact on liver health.  
7  
8  
9

10  
11  
12 Author contribution statement:

13  
14  
15 HJ: conceptualization, methodology, conduct, analysis, writing of initial draft

16 HO: methodology, conduct, figures/infographic, critical review and comments on drafts

17 DC: supervision of methodology, conduct, critical review and comments on drafts

18 DS: methodology, conduct, critical review and comments on drafts

19 BH: conceptualization, supervision of methodology, conduct, analysis, critical review and  
20 comments on drafts

21 QA: conceptualization, supervision of conduct and analysis, critical review and comments on  
22 drafts  
23  
24  
25

26 Competing interest statement:

27  
28 All authors have completed the Unified Competing Interest form and declare that the study was  
29 funded by an NIHR Doctoral Research Fellowship (HJ personal award). There were no financial  
30 relationships with any organisations that might have an interest in the submitted work in the  
31 previous three years. All authors report no other relationships or activities that could appear to  
32 have influenced the submitted work.  
33  
34

35  
36 HJ reports grants from National Institute for Health research (NIHR), during the conduct of the  
37 study; personal fees from Intercept Pharma, personal fees from Norgine, outside the submitted  
38 work;

39 QMA reports grants from European Commission, during the conduct of the study; other from  
40 Acuitas Medical, grants, personal fees and other from Allergan/Tobira, other from E3Bio, other  
41 from Eli Lilly & Company Ltd, other from Galmed, grants, personal fees and other from Genfit  
42 SA, personal fees and other from Gilead, other from Grunthal, other from Imperial Innovations,  
43 grants and other from Intercept Pharma Europe Ltd, other from Inventiva, other from Janssen,  
44 personal fees from Kenes, other from MedImmune, other from NewGene, grants and other from  
45 Pfizer Ltd, other from Raptor Pharma, grants from GlaxoSmithKline, grants and other from  
46 Novartis Pharma AG, grants from Abbvie, personal fees from BMS, grants from GSK, other from  
47 NGMBio, other from Madrigal, other from Servier, outside the submitted work;  
48  
49  
50

51 Funding statement:

52  
53 This work was supported by and NIHR Doctoral Research Fellowship – HJ personal award.  
54 Award no: NIHR300716.  
55  
56  
57  
58  
59  
60

1  
2  
3 Data Sharing statement:  
4

5 All data relevant to the study are included in the article or uploaded as supplementary  
6 information  
7

8  
9 Ethics approval statement:  
10

11 Ethical approval was not required for this study as it involved synthesising existing data and did  
12 not involve any human or animal participants.  
13  
14

15  
16  
17  
18  
19  
20  
21  
22  
23  
24  
25  
26  
27  
28  
29  
30  
31  
32  
33  
34  
35  
36  
37  
38  
39  
40  
41  
42  
43  
44  
45  
46  
47  
48  
49  
50  
51  
52  
53  
54  
55  
56  
57  
58  
59  
60  
References:  
20

1. Williams R, Aspinall R, Bellis M, et al. Addressing liver disease in the UK: a blueprint for attaining excellence in health care and reducing premature mortality from lifestyle issues of excess consumption of alcohol, obesity, and viral hepatitis. *Lancet*. 2014;384(9958):1953–97.
2. GBD 2017 Cirrhosis Collaborators. The global, regional, and national burden of cirrhosis by cause in 195 countries and territories, 1990-2017: a systematic analysis for the Global Burden of Disease Study 2017. *Lancet Gastroenterol Hepatol*. 2020 Mar;5(3):245-266.
3. Martinez R, Lloyd-Sherlock P, Soliz P, et al. Trends in premature avertable mortality from non-communicable diseases for 195 countries and territories, 1990-2017: a population-based study. *Lancet Glob Health* 2020;8:e511-e523.
4. Boyle M, Masson S, Anstee QM. The bidirectional impacts of alcohol consumption and the metabolic syndrome: Cofactors for progressive fatty liver disease. *J Hepatol*. 2018;68(2):251–67.
5. Williams R, Alexander G, Armstrong I, et al. Disease burden and costs from excess alcohol consumption, obesity, and viral hepatitis: fourth report of the Lancet Standing Commission on Liver Disease in the UK. *Lancet*. 2017 Nov 28;
6. Baumeister SE, Alte D, Meyer C, John U. Health Risk drinking and problematic consumption of alcohol in Pomerania: comparative analysis of the Study of Health in Pomerania (SHIP) compared with the Federal German Health and Examination Survey in 1998. *Gesundheitswesen*. 2005 Jan;67(1):39–47.

- 1  
2  
3 7. Collaborators GBDA. Alcohol use and burden for 195 countries and territories, 1990-  
4 2016: a systematic analysis for the Global Burden of Disease Study 2016. *Lancet*  
5 2018;392:1015-1035.
- 6  
7  
8 8. UK Chief Medical Officers' Low Risk Drinking Guidelines. Available at:  
9 [https://assets.publishing.service.gov.uk/government/uploads/system/uploads/attachment](https://assets.publishing.service.gov.uk/government/uploads/system/uploads/attachment_data/file/545937/UK_CMOs_report.pdf)  
10 [\\_data/file/545937/UK\\_CMOs\\_report.pdf](https://assets.publishing.service.gov.uk/government/uploads/system/uploads/attachment_data/file/545937/UK_CMOs_report.pdf)
- 11  
12 9. Cirrhosis in over 16s: assessment and management | Guidance and guidelines | NICE.  
13 Available from: <https://www.nice.org.uk/guidance/ng50>
- 14  
15 10. Hart CL, Morrison DS, Batty GD, Mitchell RJ, Davey Smith G. Effect of body mass index  
16 and alcohol consumption on liver disease: analysis of data from two prospective cohort  
17 studies. *BMJ*. 2010 Mar 11;340:c1240.
- 18  
19 11. Liu B, Balkwill A, Reeves G, Beral V, Million Women Study Collaborators. Body mass  
20 index and risk of liver cirrhosis in middle aged UK women: prospective study. *BMJ*. 2010  
21 Mar 11;340:c912.
- 22  
23 12. Thun MJ, Peto R, Lopez AD, et al. Alcohol consumption and mortality among middle-  
24 aged and elderly U.S. adults. *N Engl J Med*. 1997 Dec 11;337(24):1705–14.
- 25  
26 13. Sookoian S, Castaño GO, Pirola CJ. Modest alcohol consumption decreases the risk of  
27 non-alcoholic fatty liver disease: a meta-analysis of 43 175 individuals. *Gut*. 2014  
28 Mar;63(3):530–2.
- 29  
30 14. Tarantino G, Citro V, Capone D. Nonalcoholic Fatty Liver Disease: A Challenge from  
31 Mechanisms to Therapy. *Journal of Clinical Medicine*. 2020 Jan;9(1):15. Available from:  
32 <https://www.mdpi.com/2077-0383/9/1/15>
- 33  
34 15. Moher D, Liberati A, Tetzlaff J, Altman DG, The PRISMA Group (2009). *Preferred*  
35 *Reporting Items for Systematic Reviews and Meta-Analyses: The PRISMA Statement*.  
36 *PLoS Med* 6(7): e1000097. doi:10.1371/journal.pmed1000097
- 37  
38 16. Ouzzani M, Hammady H, Fedorowicz Z, Elmagarmid A. Rayyan-a web and mobile app  
39 for systematic reviews. *Syst Rev*. 2016 05;5(1):210.
- 40  
41 17. Moons KGM, Groot JAH de, Bouwmeester W, et al. Critical Appraisal and Data  
42 Extraction for Systematic Reviews of Prediction Modelling Studies: The CHARMS  
43 Checklist. *PLOS Medicine*. 2014 Oct 14;11(10):e1001744.
- 44  
45 18. Hayden JA, van der Windt DA, Cartwright JL, Côté P, Bombardier C. Assessing bias in  
46 studies of prognostic factors. *Ann Intern Med*. 2013 Feb 19;158(4):280–6.
- 47  
48  
49  
50  
51  
52  
53  
54  
55  
56  
57  
58  
59  
60

19. Popay J, Roberts H, Sowden A, et al. Guidance on the conduct of narrative synthesis in systematic reviews: a product from the ESRC Methods Programme. Lancaster: Lancaster University. 2006;10(2.1):1018–4643
20. Akahane T, Fukui K, Yoshiji H. Light-to-moderate alcohol consumption protects against fatty liver and improves insulin resistance. *Hepatology*;66:1143A-4A.
21. Akahane T, Namisaki T, Kitade M, Kaji K, Takaya H, Shimozato N, et al. Moderate alcohol consumption protects against fatty liver in males. *Journal of Hepatology*;68:S841
22. Chang Y, Ryu S, Kim Y, Cho YK, Sung E, Kim HN, et al. Low Levels of Alcohol Consumption, Obesity, and Development of Fatty Liver With and Without Evidence of Advanced Fibrosis. *Hepatology*;19:19.
23. Colic-Cvrlje V, Naumovski-Mihalic S, Prskalo M, Colic A, Cvjeticanin B, Sabaric B. Prognosis for the patients with alcoholic and nonalcoholic liver disease. *Collegium Antropologicum*;24:249-52.
24. Cotrim HP, Freitas LA, Alves E, Almeida A, May DS, Caldwell S. Effects of light-to-moderate alcohol consumption on steatosis and steatohepatitis in severely obese patients. *European Journal of Gastroenterology & Hepatology* 2009;21:969-72.
25. Hara T, Seko Y, Iwai N, Inada Y, Tsuji T, Okuda T, et al. Comparison of the effect of light alcohol consumption on Japanese men with and without fatty liver. *Biomedical Reports*;11:191-8.
26. Hayashi PH, Harrison SA, Torgerson S, Perez TA, Nochajski T, Russell M. Cognitive lifetime drinking history in nonalcoholic fatty liver disease: some cases may be alcohol related. *American Journal of Gastroenterology*;99:76-81.
27. Ascha MS, Hanouneh IA, Lopez R, Tamimi TA, Feldstein AF, Zein NN. The incidence and risk factors of hepatocellular carcinoma in patients with nonalcoholic steatohepatitis. *Hepatology*;51:1972-8.
28. Kimura T, Tanaka N, Fujimori N, Sugiura A, Yamazaki T, Joshita S, et al. Mild drinking habit is a risk factor for hepatocarcinogenesis in non-alcoholic fatty liver disease with advanced fibrosis. *World Journal of Gastroenterology*;24:1440-50.
29. Moylan CA, Dellinger A, Pang H, Suzuki A, Tillmann HL, Hampton D, et al. Modest alcohol consumption attenuates expression of fibrosis-associated genes in patients with non-alcoholic fatty liver disease (NAFLD). *Gastroenterology*;1:S914-S5.
30. Patel PJ, Smith D, Connor JP, Horsfall LU, Hayward KL, Hossain F, et al. Alcohol consumption in diabetic patients with nonalcoholic fatty liver disease. *Canadian Journal of Gastroenterology and Hepatology* 2017;2017 7927685.

- 1  
2  
3 31. Patel PJ, Smith DD, Stuart KA, Horsfall LU, Hayward KL, Hossain F, et al. Can modest  
4 alcohol intake be dismissed as a co-factor in diabetic patients with non-alcoholic fatty  
5 liver disease? *Journal of Hepatology* 2017;66:S588.
- 6  
7  
8 32. Bharmal SJ, Lake J, Boldt M, Watt KD, Jackson S, Hanouneh I. Long-term outcomes of  
9 patients with non-obese fatty liver disease (NOFLD): A study from the national health  
10 and nutrition examination survey. *Gastroenterology*;152:S683-S4.
- 11  
12  
13 33. Clement P, Ellison RC. Alcohol consumption and risk of death in people with  
14 nonalcoholic fatty liver disease. [French]. *Revue Medicale Suisse*;15:1416
- 15  
16 34. Hajifathalian K, McCullough A. Effect of alcohol consumption on survival in nonalcoholic  
17 fatty liver disease: A national prospective cohort study. *Gastroenterology*;152:S1054-S5.
- 18  
19 35. Xu L, Xie J, Chen S, Chen Y, Yang H, Miao M, et al. Light-to-Moderate Alcohol  
20 Consumption Is Associated With Increased Risk of Type 2 Diabetes in Individuals With  
21 Nonalcoholic Fatty Liver Disease: A Nine-Year Cohort Study. *The American journal of*  
22 *gastroenterology*. 2020;115(6):876-84.
- 23  
24  
25 36. Younossi ZM, Stepanova M, Ong J, Yilmaz Y, Duseja A, Eguchi Y, et al. Effects of  
26 Alcohol Consumption and Metabolic Syndrome on Mortality in Patients With  
27 Nonalcoholic and Alcohol-Related Fatty Liver Disease. *Clinical Gastroenterology &*  
28 *Hepatology*;17:1625-33.e1
- 29  
30  
31 37. Huang A, Chang B, Sun Y, Teng G, Zou ZS. Effect of alcohol consumption on  
32 biochemical and histological features of patients with biopsy-proven steatohepatitis.  
33 *Hepatology*;68:1309A
- 34  
35  
36 38. Ivanova R, Alexiev A, Mateva L. Fatty liver disease (FLD) and various alcohol intake in  
37 patients with obesity. *Journal of Gastrointestinal and Liver Diseases* 2012;3:20.
- 38  
39 39. Mitchell T, Jeffrey GP, MacQuillan GC, Garas G, Ching H, Hamdorf JM, et al. The  
40 impact of alcohol consumption on hepatic fibrosis in non-alcoholic fatty liver disease.  
41 *Hepatology*;64:548A.
- 42  
43  
44 40. Younossi ZM, Stepanova M, Ong J, Yilmaz Y, Duseja AK, Eguchi Y, et al. Non-alcoholic  
45 fatty liver disease (NAFLD) and alcoholic fatty liver disease (AFLD): The impact of  
46 alcohol consumption and metabolic syndrome on mortality. *Hepatology*;68:801A-2A
- 47  
48  
49 41. Hagstrom H, Nasr P, Ekstedt M, Kechagias S, Onnerhag K, Nilsson E, et al. Low to  
50 moderate lifetime alcohol consumption is associated with less advanced stages of  
51 fibrosis in non-alcoholic fatty liver disease. *Hepatology*;64:18A-9A
- 52  
53  
54  
55  
56  
57  
58  
59  
60

- 1
  - 2
  - 3
  - 4
  - 5
  - 6
  - 7
  - 8
  - 9
  - 10
  - 11
  - 12
  - 13
  - 14
  - 15
  - 16
  - 17
  - 18
  - 19
  - 20
  - 21
  - 22
  - 23
  - 24
  - 25
  - 26
  - 27
  - 28
  - 29
  - 30
  - 31
  - 32
  - 33
  - 34
  - 35
  - 36
  - 37
  - 38
  - 39
  - 40
  - 41
  - 42
  - 43
  - 44
  - 45
  - 46
  - 47
  - 48
  - 49
  - 50
  - 51
  - 52
  - 53
  - 54
  - 55
  - 56
  - 57
  - 58
  - 59
  - 60
42. Kashiwagi K, Yamaguchi A, Shiba S, Taniki N, Inoue N, Takaishi H, et al. Moderate alcohol consumption is not associated with subclinical cardiovascular damage but with hepatic fibrosis in non-alcoholic fatty liver disease. *Alcohol*. 2020;89:1-7.
43. Kwon HK, Greenson JK, Conjeevaram HS. Effect of lifetime alcohol consumption on the histological severity of non-alcoholic fatty liver disease. *Liver International*;34:129-35.
44. Mitchell T, Jeffrey GP, de Boer B, MacQuillan G, Garas G, Ching H, et al. Type and Pattern of Alcohol Consumption is Associated With Liver Fibrosis in Patients With Non-alcoholic Fatty Liver Disease. *American Journal of Gastroenterology*;113:1484-93.
45. Mulazzani L, Alvisi M, Tovoli F, Leoni S, Goio E, Benevento F, et al. Moderate alcohol consumption is associated with risk of fibrosis in patients with non-alcoholic fatty liver disease. *Digestive and Liver Disease*. 2020;52:e43-e4.
46. Sookoian S, Flichman D, Castano GO, Pirola CJ. Mendelian randomisation suggests no beneficial effect of moderate alcohol consumption on the severity of nonalcoholic fatty liver disease. *Alimentary Pharmacology & Therapeutics*;44:1224-34
47. Yamada K, Mizukoshi E, Seike T, Horii R, Kitahara M, Sunagozaka H, et al. Light alcohol consumption has the potential to suppress hepatocellular injury and liver fibrosis in non-alcoholic fatty liver disease. *PLoS ONE*.2018;13:e0191026.
48. Aberg F, Farkkila M. Drinking and Obesity: Alcoholic Liver Disease/Nonalcoholic Fatty Liver Disease Interactions. *Seminars in liver disease*. 2020;40(2):154-62.
49. Aberg F, Farkkila M, Mannisto V. Interaction Between Alcohol Use and Metabolic Risk Factors for Liver Disease: A Critical Review of Epidemiological Studies. *Alcoholism-Clinical and Experimental Research*. 2020;44(2):384-403.
50. Aberg F, Puukka P, Salomaa V, Mannisto S, Lundqvist A, Valsta L, et al. Combined Effects of Alcohol and Metabolic Disorders in Patients With Chronic Liver Disease. *Clinical Gastroenterology and Hepatology*. 2020;18(4):995.
51. Armstrong MJ, Mellinger JL, Trivedi PJ. Alcohol Consumption in Patients with Non-alcoholic Fatty Liver Disease: Convenient vs. Inconvenient Truths. *American Journal of Gastroenterology*;113:1437-9.
52. Glyn-Owen K, Bohning D, Parkes J, Roderick P, Buchanan R. The combined effect of alcohol and obesity on risk of liver disease: A systematic review and metaanalysis. *Hepatology* v70 suppl1 2019. 2019;70:753A.
53. Idalsoaga F, Kulkarni AV, Mousa OY, Arrese M, Arab JP. Non-alcoholic Fatty Liver Disease and Alcohol-Related Liver Disease: Two Intertwined Entities. *Frontiers in Medicine*. 2020;7:448.

- 1  
2  
3 54. Petroni ML, Brodosi L, Marchignoli F, Musio A, ra, Marchesini G. Moderate Alcohol  
4 Intake in Non-Alcoholic Fatty Liver Disease: To Drink or Not to Drink? *Nutrients*  
5 2019;11:3048.  
6  
7  
8 55. Weng G, Dunn W. Effect of alcohol consumption on nonalcoholic fatty liver disease.  
9 *Translational Gastroenterology & Hepatology* 2019;4:70.  
10  
11 56. Åberg F, Puukka P, Sahlman P et al. In NAFLD, alcohol drinking habits and genetics  
12 predict progression to advanced liver disease: follow-up of population surveys. *Journal*  
13 *of Hepatology*. 2019; 70: e141. (poster abstract)  
14  
15 57. Åberg F, Puukka P, Salomaa V, et al. Risks of Light and Moderate Alcohol Use in Fatty  
16 Liver Disease: Follow-Up of Population Cohorts. *Hepatology*. 2020 Mar;71(3):835–48.  
17  
18 58. Ajmera V, Belt P, Wilson LA, et al. Among Patients With Nonalcoholic Fatty Liver  
19 Disease, Modest Alcohol Use Is Associated With Less Improvement in Histologic  
20 Steatosis and Steatohepatitis. *Clin Gastroenterol Hepatol*. 2018;16(9):1511-1520.e5.  
21  
22 59. Chang Y, Cho YK, Kim Y, et al. Nonheavy Drinking and Worsening of Noninvasive  
23 Fibrosis Markers in Nonalcoholic Fatty Liver Disease: A Cohort Study. *Hepatology*.  
24 2019;69(1):64–75.  
25  
26 60. Ekstedt M, Franzén LE, Holmqvist M, et al. Alcohol consumption is associated with  
27 progression of hepatic fibrosis in non-alcoholic fatty liver disease. *Scand J*  
28 *Gastroenterol*. 2009;44(3):366–74.  
29  
30 61. Kawamura Y, Arase Y, Ikeda K, et al. Effects of Alcohol Consumption on  
31 Hepatocarcinogenesis in Japanese Patients With Fatty Liver Disease. *Clin Gastroenterol*  
32 *Hepatol*. 2016 Apr;14(4):597–605.  
33  
34 62. European Association for the Study of the Liver (EASL), European Association for the  
35 Study of Diabetes (EASD), European Association for the Study of Obesity (EASO).  
36 EASL-EASD-EASO Clinical Practice Guidelines for the Management of Non-Alcoholic  
37 Fatty Liver Disease. *Obes Facts*. 2016;9(2):65–90.  
38  
39 63. Bedogni G, Bellentani S, Miglioli L, et al. The Fatty Liver Index: a simple and accurate  
40 predictor of hepatic steatosis in the general population. *BMC Gastroenterol*. 2006 Nov  
41 2;6:33.  
42  
43 64. Negro F. Natural history of NASH and HCC. *Liver Int*. 2020;40 Suppl 1:72–6.  
44  
45 65. Dunn W, Sanyal AJ, Brunt EM, et al. Modest alcohol consumption is associated with  
46 decreased prevalence of steatohepatitis in patients with non-alcoholic fatty liver disease  
47 (NAFLD). *J Hepatol*. 2012 Aug;57(2):384–91.  
48  
49  
50  
51  
52  
53  
54  
55  
56  
57  
58  
59  
60

- 1  
2  
3 66. Hagström H, Nasr P, Ekstedt M, et al. Low to moderate lifetime alcohol consumption is  
4 associated with less advanced stages of fibrosis in non-alcoholic fatty liver disease.  
5 Scand J Gastroenterol. 2017 Feb;52(2):159–65.  
6  
7 67. Hajifathalian K, Torabi Sagvand B, McCullough AJ. Effect of Alcohol Consumption on  
8 Survival in Nonalcoholic Fatty Liver Disease: A National Prospective Cohort Study.  
9 Hepatology. 2019;70(2):511–21.  
10  
11 68. Klatsky AL. Alcohol and cardiovascular diseases. Expert Review of Cardiovascular  
12 Therapy [Internet]. 2009 May 1 [cited 2020 Sep 14];7(5):499–506.  
13  
14 69. Sinn DH, Gwak G-Y, Cho J, et al. Modest alcohol consumption and carotid plaques or  
15 carotid artery stenosis in men with non-alcoholic fatty liver disease. Atherosclerosis.  
16 2014 Jun 1;234(2):270–5.  
17  
18 70. VanWagner LB, Ning H, Allen NB, et al. Alcohol Use and Cardiovascular Disease Risk in  
19 Patients With Nonalcoholic Fatty Liver Disease. Gastroenterology. 2017;153(5):1260-  
20 1272.e3.  
21  
22 71. Ajmera VH, Terrault NA, Harrison SA. Is moderate alcohol use in nonalcoholic fatty liver  
23 disease good or bad? A critical review. Hepatology. 2017 Jun;65(6):2090–9.  
24  
25 72. Chalasani N, Younossi Z, Lavine JE, et al. The diagnosis and management of non-  
26 alcoholic fatty liver disease: practice guideline by the American Gastroenterological  
27 Association, American Association for the Study of Liver Diseases, and American  
28 College of Gastroenterology. Gastroenterology. 2012 Jun;142(7):1592–609.  
29  
30  
31  
32  
33  
34  
35  
36  
37

38 Figure 1: PRISMA diagram of study selection  
39  
40  
41  
42  
43  
44  
45  
46  
47  
48  
49  
50  
51  
52  
53  
54  
55  
56  
57  
58  
59  
60



Fig 1: PRISMA diagram of study selection

7

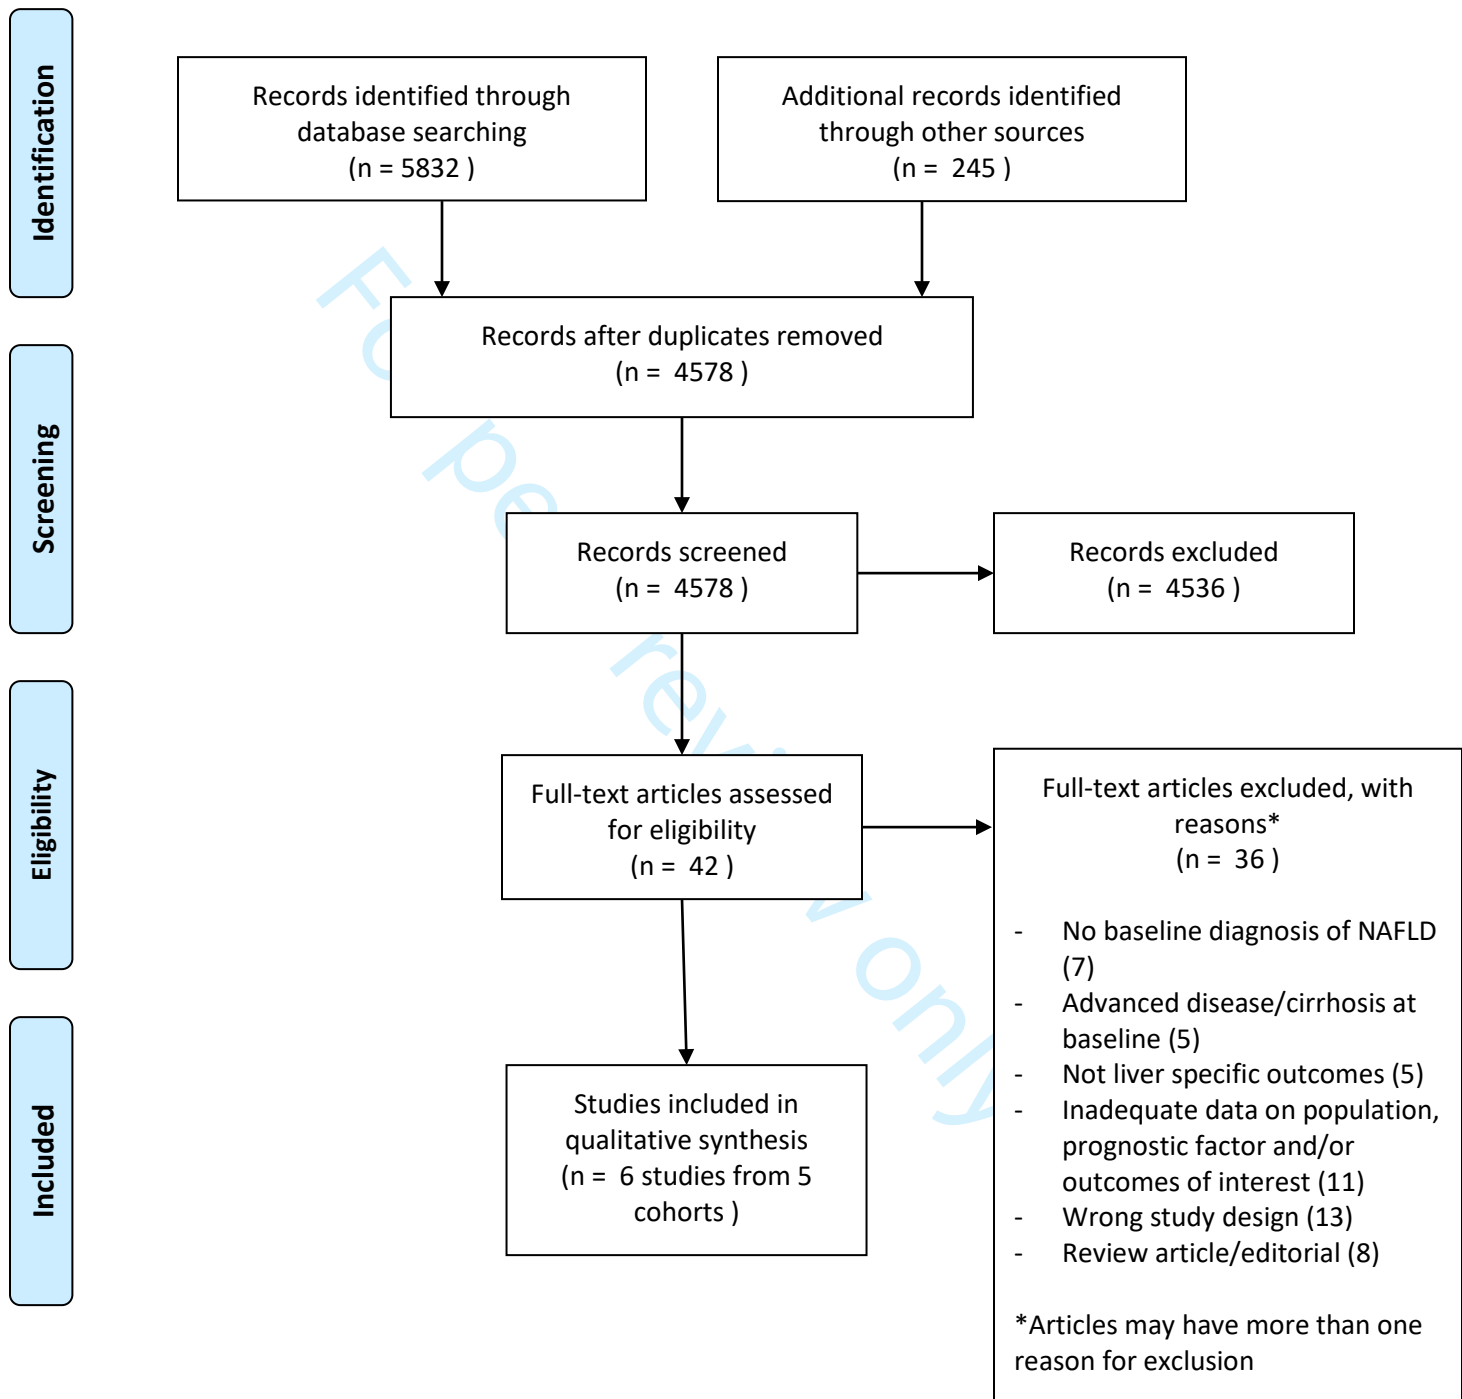

**Medline(Ovid)**

1. (((fatty or fat or steato\*) adj3 (liver\* or hepat\*))) or steatohepat\* or (visceral adj2 steato\*).ti,ab.
2. non-alcoholic fatty liver disease/
3. fatty liver/
4. (nafl\* or nash).ti,ab.
5. non?alcoholic steato\*.mp. [mp=title, abstract, original title, name of substance word, subject heading word, floating sub-heading word, keyword heading word, organism supplementary concept word, protocol supplementary concept word, rare disease supplementary concept word, unique identifier, synonyms]
6. (non?alcoholic adj3 (liver or fat\*)).mp. [mp=title, abstract, original title, name of substance word, subject heading word, floating sub-heading word, keyword heading word, organism supplementary concept word, protocol supplementary concept word, rare disease supplementary concept word, unique identifier, synonyms]
7. or/1-6
8. exp Alcohol Drinking/
9. Alcoholism/ or Alcoholic Beverages/
10. (alcohol adj2 (unit\* or consum\* or level\* or mg or g)).ti,ab.
11. (moderat\* adj3 alcohol\*).mp. [mp=title, abstract, original title, name of substance word, subject heading word, floating sub-heading word, keyword heading word, organism supplementary concept word, protocol supplementary concept word, rare disease supplementary concept word, unique identifier, synonyms]
12. or/8-11
13. 7 and 12
14. liver disease.mp. [mp=title, abstract, original title, name of substance word, subject heading word, floating sub-heading word, keyword heading word, organism supplementary concept word, protocol supplementary concept word, rare disease supplementary concept word, unique identifier, synonyms]
15. fibrosis.mp. [mp=title, abstract, original title, name of substance word, subject heading word, floating sub-heading word, keyword heading word, organism supplementary concept word, protocol supplementary concept word, rare disease supplementary concept word, unique identifier, synonyms]
16. (scar\* adj3 liver).mp. [mp=title, abstract, original title, name of substance word, subject heading word, floating sub-heading word, keyword heading word, organism supplementary concept word, protocol supplementary concept word, rare disease supplementary concept word, unique identifier, synonyms]
17. cicatrix.mp. [mp=title, abstract, original title, name of substance word, subject heading word, floating sub-heading word, keyword heading word, organism supplementary concept word, protocol supplementary concept word, rare disease supplementary concept word, unique identifier, synonyms]
18. (end-stage adj3 liver).mp. [mp=title, abstract, original title, name of substance word, subject heading word, floating sub-heading word, keyword heading word, organism supplementary concept word, protocol supplementary concept word, rare disease supplementary concept word, unique identifier, synonyms]
19. ((liver or biliary) adj cirrhosis).mp. [mp=title, abstract, original title, name of substance word, subject heading word, floating sub-heading word, keyword heading word, organism supplementary concept word, protocol supplementary concept word, rare disease supplementary concept word, unique identifier, synonyms]
20. (hepatic insufficiency or liver failure or end stage liver disease or hepatic failure or hepatic encephalopathy or hepatic impairment).mp. [mp=title, abstract, original title, name of substance

word, subject heading word, floating sub-heading word, keyword heading word, organism supplementary concept word, protocol supplementary concept word, rare disease supplementary concept word, unique identifier, synonyms]

21. (mortality or death or dead or deceased or passed away).mp. [mp=title, abstract, original title, name of substance word, subject heading word, floating sub-heading word, keyword heading word, organism supplementary concept word, protocol supplementary concept word, rare disease supplementary concept word, unique identifier, synonyms]

22. ((hepatocellular or liver cell) adj carcinoma).mp. [mp=title, abstract, original title, name of substance word, subject heading word, floating sub-heading word, keyword heading word, organism supplementary concept word, protocol supplementary concept word, rare disease supplementary concept word, unique identifier, synonyms]

23. or/14-22

24. 13 and 23

25. limit 24 to yr="1990-Current"

### Embase(Ovid)

1. (((fatty or fat or steato\*) adj3 (liver\* or hepat\*))) or steatohepat\* or (visceral adj2 steato\*).ti,ab.

2. exp nonalcoholic fatty liver/

3. (naf1\* or nash).ti,ab.

4. non?alcoholic steato\*.mp. [mp=title, abstract, heading word, drug trade name, original title, device manufacturer, drug manufacturer, device trade name, keyword, floating subheading word, candidate term word]

5. (non?alcoholic adj3 (liver or fat\*)).mp. [mp=title, abstract, heading word, drug trade name, original title, device manufacturer, drug manufacturer, device trade name, keyword, floating subheading word, candidate term word]

6. or/1-5

7. drinking behavior/

8. exp alcoholism/

9. exp alcoholic beverage/

10. (alcohol adj2 (unit\* or consum\* or level\* or mg or g)).ti,ab.

11. (moderat\* adj3 alcohol\*).mp. [mp=title, abstract, heading word, drug trade name, original title, device manufacturer, drug manufacturer, device trade name, keyword, floating subheading word, candidate term word]

12. or/7-11

13. 6 and 12

14. liver disease.mp. [mp=title, abstract, heading word, drug trade name, original title, device manufacturer, drug manufacturer, device trade name, keyword, floating subheading word, candidate term word]

15. fibrosis.mp. [mp=title, abstract, heading word, drug trade name, original title, device manufacturer, drug manufacturer, device trade name, keyword, floating subheading word, candidate term word]

16. (scar\* adj3 liver).mp. [mp=title, abstract, heading word, drug trade name, original title, device manufacturer, drug manufacturer, device trade name, keyword, floating subheading word, candidate term word]

17. cicatrix.mp. [mp=title, abstract, heading word, drug trade name, original title, device manufacturer, drug manufacturer, device trade name, keyword, floating subheading word, candidate term word]

- 1  
2  
3 18. ((hepatocellular or liver cell) adj carcinoma).mp. [mp=title, abstract, heading word, drug trade  
4 name, original title, device manufacturer, drug manufacturer, device trade name, keyword, floating  
5 subheading word, candidate term word]  
6  
7 19. (end-stage adj3 liver).mp. [mp=title, abstract, heading word, drug trade name, original title,  
8 device manufacturer, drug manufacturer, device trade name, keyword, floating subheading word,  
9 candidate term word]  
10  
11 20. (Mortality or death or dead or deceased or passed away).mp. [mp=title, abstract, heading  
12 word, drug trade name, original title, device manufacturer, drug manufacturer, device trade name,  
13 keyword, floating subheading word, candidate term word]  
14  
15 21. ((liver or biliary) adj cirrhosis).mp. [mp=title, abstract, heading word, drug trade name,  
16 original title, device manufacturer, drug manufacturer, device trade name, keyword, floating  
17 subheading word, candidate term word]  
18  
19 22. (hepatic insufficiency or liver failure or end stage liver disease or hepatic failure or hepatic  
20 encephalopathy or hepatic impairment).mp. [mp=title, abstract, heading word, drug trade name,  
21 original title, device manufacturer, drug manufacturer, device trade name, keyword, floating  
22 subheading word, candidate term word]  
23  
24 23. or/14-22  
25  
26 24. 13 and 23  
27  
28 25.  
29  
30 26. limit 25 to yr="1990 -Current"

### Cochrane library

- | ID  | Search                                                                                                                                 | Hits |
|-----|----------------------------------------------------------------------------------------------------------------------------------------|------|
| #1  | ((fatty or fat or steato*) NEAR/3 (liver* or hepat*)) or steatohepat* or (visceral NEAR/2 steato*)                                     |      |
| #2  | MeSH descriptor: [Non-alcoholic Fatty Liver Disease] this term only                                                                    |      |
| #3  | MeSH descriptor: [Fatty Liver] this term only                                                                                          |      |
| #4  | (naf1* or nash)                                                                                                                        |      |
| #5  | non?alcoholic steato*                                                                                                                  |      |
| #6  | (non?alcoholic NEAR/3 (liver or fat*))                                                                                                 |      |
| #7  | #1 or #2 or #3 or #4 or #5 or #6                                                                                                       |      |
| #8  | MeSH descriptor: [Alcohol Drinking] explode all trees                                                                                  |      |
| #9  | MeSH descriptor: [Alcoholism] this term only                                                                                           |      |
| #10 | MeSH descriptor: [Alcoholic Beverages] this term only                                                                                  |      |
| #11 | (alcohol NEAR/2 (unit* or consum* or level* or mg or g))                                                                               |      |
| #12 | (moderat* NEAR/3 alcohol)                                                                                                              |      |
| #13 | #8 or #9 or #10 or #11 or #12                                                                                                          |      |
| #14 | #7 AND #13                                                                                                                             |      |
| #15 | Liver disease                                                                                                                          |      |
| #16 | Fibrosis                                                                                                                               |      |
| #17 | cicatrix or (scar* NEAR/3 liver)                                                                                                       |      |
| #18 | (end-stage NEAR/3 liver)                                                                                                               |      |
| #19 | ((Liver or biliary) NEAR cirrhosis)                                                                                                    |      |
| #20 | (hepatic insufficiency or liver failure or end stage liver disease or hepatic failure or hepatic encephalopathy or hepatic impairment) |      |
| #21 | (Mortality or death or dead or deceased or passed away)                                                                                |      |
| #22 | ((hepatocellular or liver cell) NEAR carcinoma)                                                                                        |      |
| #23 | #15 or #16 or #17 or #18 or #19 or #20 or #21 or #22                                                                                   |      |

#24 #14 AND #23 with Cochrane Library publication date Between Jan 1990 and Dec 2019

### CINAHL(EBSKO)

S1 TI ( (((fatty or fat or steato\*) N3 (liver\* or hepat\*)) or steatohepat\* or (visceral N2 steato\*)) ) OR AB ( (((fatty or fat or steato\*) N3 (liver\* or hepat\*)) or steatohepat\* or (visceral N2 steato\*)) ) OR (MH "Nonalcoholic Fatty Liver Disease") OR (MH "Fatty Liver") OR TI ( (naf1\* or nash) ) OR AB ( (naf1\* or nash) ) OR non#alcoholic steato\* OR ( (non-alcoholic N3 (liver or fat\*)) )

S2 (MH "Alcoholic Drinking+") OR ( ((MH "Alcoholism") or (MH "Alcoholic Beverages")) ) OR TI ( (alcohol N2 (unit\* or consum\* or level\* or mg or g)) ) OR AB ( (alcohol N2 (unit\* or consum\* or level\* or mg or g)) ) OR AB (moderat\* N3 alcohol)

S3 S1 AND S2

S4 (Liver Diseases OR Liver Failure OR ((Liver or biliary) N1 Cirrhosis) OR Fibrosis OR Cicatrix OR (scar\* N3 liver) OR (end-stage N3 liver) OR hepatic insufficiency OR end stage liver disease OR hepatic failure OR hepatic encephalopathy OR hepatic impairment OR Mortality OR death OR dead OR deceased OR passed away OR ((Hepatocellular OR liver cell) N1 carcinoma))

S5 S3 AND S4

### Web of Science (CPCI)

1. TS = (((fatty or fat or steato\* \_ NEAR/3 (liver\* or hepat\*)) or steatohepat\* or (visceral NEAR/2 steato\*))
2. TS = non-alcoholic fatty liver disease
3. TS = fatty liver
4. TS = (naf1\* or nash)
5. TS = non-alcohol steato\*
6. TS = (non-alcoholic NEAR/3 (liver or fat\*))
7. #1 OR #2 OR #3 OR #4 OR #5 OR #6
8. TS = alcohol drinking
9. TS = (alcoholism or alcoholic beverages)
10. TS = (alcohol NEAR/2 (unit\* or consum\* or level\* or mg or g))
11. TS = (moderate NEAR/3 alcohol\*)
12. #8 OR #9 OR #10 OR #11
13. #7 AND #12
14. TS = liver disease
15. TS = fibrosis
16. TS = cicatrix
17. TS = (end-stage NEAR/3 liver)
18. TS = liver cirrhosis
19. TS = hepatic insufficiency
20. #14 OR #15 OR #16 OR #17 OR #18 OR #19
21. #13 AND #20

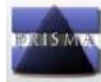

## PRISMA 2020 Checklist

| Section and Topic             | Item # | Checklist item                                                                                                                                                                                                                                                                                       | Location where item is reported |
|-------------------------------|--------|------------------------------------------------------------------------------------------------------------------------------------------------------------------------------------------------------------------------------------------------------------------------------------------------------|---------------------------------|
| <b>TITLE</b>                  |        |                                                                                                                                                                                                                                                                                                      |                                 |
| Title                         | 1      | Identify the report as a systematic review.                                                                                                                                                                                                                                                          | title                           |
| <b>ABSTRACT</b>               |        |                                                                                                                                                                                                                                                                                                      |                                 |
| Abstract                      | 2      | See the PRISMA 2020 for Abstracts checklist.                                                                                                                                                                                                                                                         | P 2-3                           |
| <b>INTRODUCTION</b>           |        |                                                                                                                                                                                                                                                                                                      |                                 |
| Rationale                     | 3      | Describe the rationale for the review in the context of existing knowledge.                                                                                                                                                                                                                          | P3-5                            |
| Objectives                    | 4      | Provide an explicit statement of the objective(s) or question(s) the review addresses.                                                                                                                                                                                                               | P 5(end)                        |
| <b>METHODS</b>                |        |                                                                                                                                                                                                                                                                                                      |                                 |
| Eligibility criteria          | 5      | Specify the inclusion and exclusion criteria for the review and how studies were grouped for the syntheses.                                                                                                                                                                                          | P 6 (para 1-2)                  |
| Information sources           | 6      | Specify all databases, registers, websites, organisations, reference lists and other sources searched or consulted to identify studies. Specify the date when each source was last searched or consulted.                                                                                            | P 6 -7                          |
| Search strategy               | 7      | Present the full search strategies for all databases, registers and websites, including any filters and limits used.                                                                                                                                                                                 | supplementary data              |
| Selection process             | 8      | Specify the methods used to decide whether a study met the inclusion criteria of the review, including how many reviewers screened each record and each report retrieved, whether they worked independently, and if applicable, details of automation tools used in the process.                     | end P6 - P7                     |
| Data collection process       | 9      | Specify the methods used to collect data from reports, including how many reviewers collected data from each report, whether they worked independently, any processes for obtaining or confirming data from study investigators, and if applicable, details of automation tools used in the process. | end P6-7                        |
| Data items                    | 10a    | List and define all outcomes for which data were sought. Specify whether all results that were compatible with each outcome domain in each study were sought (e.g. for all measures, time points, analyses), and if not, the methods used to decide which results to collect.                        | P7                              |
|                               | 10b    | List and define all other variables for which data were sought (e.g. participant and intervention characteristics, funding sources). Describe any assumptions made about any missing or unclear information.                                                                                         | P7                              |
| Study risk of bias assessment | 11     | Specify the methods used to assess risk of bias in the included studies, including details of the tool(s) used, how many reviewers assessed each study and whether they worked independently, and if applicable, details of automation tools used in the process.                                    | P7                              |
| Effect measures               | 12     | Specify for each outcome the effect measure(s) (e.g. risk ratio, mean difference) used in the synthesis or presentation of results.                                                                                                                                                                  | table 2                         |
| Synthesis methods             | 13a    | Describe the processes used to decide which studies were eligible for each synthesis (e.g. tabulating the study intervention characteristics and comparing against the planned groups for each synthesis (item #5)).                                                                                 | P7                              |
|                               | 13b    | Describe any methods required to prepare the data for presentation or synthesis, such as handling of missing summary statistics, or data conversions.                                                                                                                                                | N/A                             |
|                               | 13c    | Describe any methods used to tabulate or visually display results of individual studies and syntheses.                                                                                                                                                                                               | table 2                         |
|                               | 13d    | Describe any methods used to synthesize results and provide a rationale for the choice(s). If meta-analysis was performed, describe the model(s), method(s) to identify the presence and extent of statistical heterogeneity, and software package(s) used.                                          | narrative                       |
|                               | 13e    | Describe any methods used to explore possible causes of heterogeneity among study results (e.g. subgroup analysis, meta-regression).                                                                                                                                                                 | N/A                             |
|                               | 13f    | Describe any sensitivity analyses conducted to assess robustness of the synthesized results.                                                                                                                                                                                                         | N/A                             |

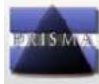

## PRISMA 2020 Checklist

|                               |     |                                                                                                                                                                                                                                                                                      |                                               |
|-------------------------------|-----|--------------------------------------------------------------------------------------------------------------------------------------------------------------------------------------------------------------------------------------------------------------------------------------|-----------------------------------------------|
| Reporting bias assessment     | 14  | Describe any methods used to assess risk of bias due to missing results in a synthesis (arising from reporting biases).                                                                                                                                                              | ROB QUIPS used - P7                           |
| Certainty assessment          | 15  | Describe any methods used to assess certainty (or confidence) in the body of evidence for an outcome.                                                                                                                                                                                | ROB - QUIPS used - P7                         |
| <b>RESULTS</b>                |     |                                                                                                                                                                                                                                                                                      |                                               |
| Study selection               | 16a | Describe the results of the search and selection process, from the number of records identified in the search to the number of studies included in the review, ideally using a flow diagram.                                                                                         | Fig 1 and para 1 of results P7-8              |
|                               | 16b | Cite studies that might appear to meet the inclusion criteria, but which were excluded, and explain why they were excluded.                                                                                                                                                          | beginning 8 and box in PRISMA diagram (fig 1) |
| Study characteristics         | 17  | Cite each included study and present its characteristics.                                                                                                                                                                                                                            | Table 2                                       |
| Risk of bias in studies       | 18  | Present assessments of risk of bias for each included study.                                                                                                                                                                                                                         | Table 2                                       |
| Results of individual studies | 19  | For all outcomes, present, for each study: (a) summary statistics for each group (where appropriate) and (b) an effect estimate and its precision (e.g. confidence/credible interval), ideally using structured tables or plots.                                                     | Table 2                                       |
| Results of syntheses          | 20a | For each synthesis, briefly summarise the characteristics and risk of bias among contributing studies.                                                                                                                                                                               | Table 2 and results narrative P10-14          |
|                               | 20b | Present results of all statistical syntheses conducted. If meta-analysis was done, present for each the summary estimate and its precision (e.g. confidence/credible interval) and measures of statistical heterogeneity. If comparing groups, describe the direction of the effect. | N/A                                           |
|                               | 20c | Present results of all investigations of possible causes of heterogeneity among study results.                                                                                                                                                                                       | N/A                                           |
|                               | 20d | Present results of all sensitivity analyses conducted to assess the robustness of the synthesized results.                                                                                                                                                                           | N/A                                           |
| Reporting biases              | 21  | Present assessments of risk of bias due to missing results (arising from reporting biases) for each synthesis assessed.                                                                                                                                                              | N/A                                           |
| Certainty of evidence         | 22  | Present assessments of certainty (or confidence) in the body of evidence for each outcome assessed.                                                                                                                                                                                  | N/A                                           |
| <b>DISCUSSION</b>             |     |                                                                                                                                                                                                                                                                                      |                                               |
| Discussion                    | 23a | Provide a general interpretation of the results in the context of other evidence.                                                                                                                                                                                                    | p16 - 1st paragraph discussion                |
|                               | 23b | Discuss any limitations of the evidence included in the review.                                                                                                                                                                                                                      | P17                                           |
|                               | 23c | Discuss any limitations of the review processes used.                                                                                                                                                                                                                                | P17                                           |
|                               | 23d | Discuss implications of the results for practice, policy, and future research.                                                                                                                                                                                                       | P18                                           |
| <b>OTHER INFORMATION</b>      |     |                                                                                                                                                                                                                                                                                      |                                               |
| Registration and              | 24a | Provide registration information for the review, including register name and registration number, or state that the review was not registered.                                                                                                                                       | abstract and 1st line                         |

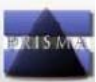

PRISMA 2020 Checklist

1  
2  
3  
4  
5  
6  
7  
8  
9  
10  
11  
12  
13  
14  
15  
16  
17  
18  
19  
20  
21  
22  
23  
24  
25  
26  
27  
28  
29  
30  
31  
32  
33  
34  
35  
36  
37  
38  
39  
40  
41  
42  
43  
44  
45  
46  
47

|                                                |     |                                                                                                                                                                                                                                            |                                                  |
|------------------------------------------------|-----|--------------------------------------------------------------------------------------------------------------------------------------------------------------------------------------------------------------------------------------------|--------------------------------------------------|
| protocol                                       |     |                                                                                                                                                                                                                                            | methods (P5/6)                                   |
|                                                | 24b | Indicate where the review protocol can be accessed, or state that a protocol was not prepared.                                                                                                                                             | methods P5/6                                     |
|                                                | 24c | Describe and explain any amendments to information provided at registration or in the protocol.                                                                                                                                            | N/A                                              |
| Support                                        | 25  | Describe sources of financial or non-financial support for the review, and the role of the funders or sponsors in the review.                                                                                                              | abstract and end of text (p19)                   |
| Competing interests                            | 26  | Declare any competing interests of review authors.                                                                                                                                                                                         | p18-19                                           |
| Availability of data, code and other materials | 27  | Report which of the following are publicly available and where they can be found: template data collection forms; data extracted from included studies; data used for all analyses; analytic code; any other materials used in the review. | search strat available - supplementary material. |

From: Page MJ, McKenzie JE, Bossuyt PM, Boutron I, Hoffmann TC, Mulrow CD, et al. The PRISMA 2020 statement: an updated guideline for reporting systematic reviews. *BMJ* 2021;372:n71. doi: 10.1136/bmj.n71  
 For more information, visit: <http://www.prisma-statement.org/>
